# Supplementary material for: Fostering student motivation towards community healthcare: a qualitative study
Source: PubMed Central journal article supplement — BMJ Open. 2021 Jan 7;11(1):e039344. doi: 10.1136/bmjopen-2020-039344 (PMC7797248; doi:10.1136/bmjopen-2020-039344), 2021-01-07
Supplement: bmjopen-2020-039344.draft_revisions.pdf [file bmjopen-2020-039344.draft_revisions.pdf]

# BMJ Open

BMJ Open is committed to open peer review. As part of this commitment we make the peer review history of every article we publish publicly available.

When an article is published we post the peer reviewers' comments and the authors' responses online. We also post the versions of the paper that were used during peer review. These are the versions that the peer review comments apply to.

The versions of the paper that follow are the versions that were submitted during the peer review process. They are not the versions of record or the final published versions. They should not be cited or distributed as the published version of this manuscript.

BMJ Open is an open access journal and the full, final, typeset and author-corrected version of record of the manuscript is available on our site with no access controls, subscription charges or pay-per-view fees (<http://bmjopen.bmj.com>).

If you have any questions on BMJ Open's open peer review process please email [info.bmjopen@bmj.com](mailto:info.bmjopen@bmj.com)

# BMJ Open

## Fostering Student Motivation toward Community Healthcare: A Qualitative Study

|                               |                                                                                                                                                                                                                                                                                                                                                                                                                                                                                                                                                                                                                                                                             |
|-------------------------------|-----------------------------------------------------------------------------------------------------------------------------------------------------------------------------------------------------------------------------------------------------------------------------------------------------------------------------------------------------------------------------------------------------------------------------------------------------------------------------------------------------------------------------------------------------------------------------------------------------------------------------------------------------------------------------|
| Journal:                      | <i>BMJ Open</i>                                                                                                                                                                                                                                                                                                                                                                                                                                                                                                                                                                                                                                                             |
| Manuscript ID                 | bmjopen-2020-039344                                                                                                                                                                                                                                                                                                                                                                                                                                                                                                                                                                                                                                                         |
| Article Type:                 | Original research                                                                                                                                                                                                                                                                                                                                                                                                                                                                                                                                                                                                                                                           |
| Date Submitted by the Author: | 12-Apr-2020                                                                                                                                                                                                                                                                                                                                                                                                                                                                                                                                                                                                                                                                 |
| Complete List of Authors:     | Yahata, Shinsuke; Kobe University Graduate School of Medicine School of Medicine, Division of Community Medicine and Medical Education Takeshima, Taro; Fukushima Medical University, Department of General Medicine, Shirakawa Satellite for Teaching and Research (STAR); Fukushima Medical University, Center for Innovative Research for Communities and Clinical Excellence (CIRC2LE) Kanzaka, Tsuneaki; Kobe University Graduate School of Medicine School of Medicine, Division of Community Medicine and Career Development Okayama, Masanobu; Kobe University Graduate School of Medicine School of Medicine, Division of Community Medicine and Medical Education |
| Keywords:                     | MEDICAL EDUCATION & TRAINING, PRIMARY CARE, QUALITATIVE RESEARCH                                                                                                                                                                                                                                                                                                                                                                                                                                                                                                                                                                                                            |
|                               |                                                                                                                                                                                                                                                                                                                                                                                                                                                                                                                                                                                                                                                                             |

SCHOLARONE™  
Manuscripts

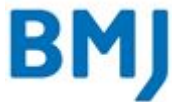

I, the Submitting Author has the right to grant and does grant on behalf of all authors of the Work (as defined in the below author licence), an exclusive licence and/or a non-exclusive licence for contributions from authors who are: i) UK Crown employees; ii) where BMJ has agreed a CC-BY licence shall apply, and/or iii) in accordance with the terms applicable for US Federal Government officers or employees acting as part of their official duties; on a worldwide, perpetual, irrevocable, royalty-free basis to BMJ Publishing Group Ltd ("BMJ") its licensees and where the relevant Journal is co-owned by BMJ to the co-owners of the Journal, to publish the Work in this journal and any other BMJ products and to exploit all rights, as set out in our [licence](#).

The Submitting Author accepts and understands that any supply made under these terms is made by BMJ to the Submitting Author unless you are acting as an employee on behalf of your employer or a postgraduate student of an affiliated institution which is paying any applicable article publishing charge ("APC") for Open Access articles. Where the Submitting Author wishes to make the Work available on an Open Access basis (and intends to pay the relevant APC), the terms of reuse of such Open Access shall be governed by a Creative Commons licence – details of these licences and which [Creative Commons](#) licence will apply to this Work are set out in our licence referred to above.

Other than as permitted in any relevant BMJ Author's Self Archiving Policies, I confirm this Work has not been accepted for publication elsewhere, is not being considered for publication elsewhere and does not duplicate material already published. I confirm all authors consent to publication of this Work and authorise the granting of this licence.

1  
2  
3  
4  
5  
6 **Fostering Student Motivation toward Community Healthcare: A**  
7  
8  
9 **Qualitative Study**  
10

11 Words: 3861  
12

13  
14  
15 Shinsuke Yahata<sup>1</sup>, Taro Takeshima<sup>2</sup>, Tsuneaki Kenzaka<sup>3</sup>, and Masanobu  
16  
17  
18 Okayama<sup>1</sup>  
19

20  
21  
22 *<sup>1</sup>Division of Community Medicine and Medical Education, Kobe University Graduate*  
23  
24  
25 *School of Medicine, Kobe, Japan.*  
26

27  
28  
29 *<sup>2</sup>Department of General Medicine, Shirakawa Satellite for Teaching and Research*  
30  
31  
32 *(STAR), Fukushima Medical University, Fukushima, Japan, and the Center for Innovative*  
33  
34  
35 *Research for Communities and Clinical Excellence (CIRC2LE), Fukushima Medical*  
36  
37  
38 *University, Fukushima, Japan.*  
39

40  
41  
42 *<sup>3</sup>Division of Community Medicine and Career Development, Kobe University Graduate*  
43  
44  
45 *School of Medicine, Kobe, Japan.*  
46

47  
48  
49 *Correspondence: Shinsuke Yahata, Division of Community Medicine and Medical*  
50  
51  
52 *Education, Kobe University Graduate School of Medicine, 2-1-5, Arata-cho, Hyogo-ku,*  
53  
54  
55 *Kobe, Hyogo, 652-0032, Japan; telephone: +81-78-382-6732; e-mail: yahata-*  
56  
57  
58 *jci@umin.ac.jp.*  
59  
60

1  
2  
3  
4  
5 Keyword: community healthcare, community-based medical education, motivation,  
6  
7 medical student, self-determination theory  
8  
9  
10

## 11 12 **Abstract**

13  
14  
15 **Objectives:** This study aims to explore the motivation mechanisms (including the factors  
16  
17 and the processes) of medical students toward community healthcare (CH) in community-  
18  
19 based medical education (CBME) program.  
20  
21  
22

23  
24  
25 **Design:** This is a qualitative study using individual in-depth semi-structured interviews.  
26  
27

28 **Setting:** Participants were recruited from regional quota (*chiikiwaku*) medical students of  
29  
30 Kobe University, Japan using consecutive sampling.  
31  
32

33  
34 **Participants:** Fourteen students participated. The median (inter-quartile range) age of  
35  
36 participants was 23 (23-24); half were in their sixth year and half in their fifth year.  
37  
38

39  
40 **Methods:** From September to December 2018, the interviews were audio-recorded and  
41  
42 transcribed verbatim. The transcribed interview data was analyzed according to the “Steps  
43  
44 for Coding and Theorization” method. Self-determination theory was used as theoretical  
45  
46 framework.  
47  
48  
49

50  
51 **Results:** While exploring the factors that influence the students’ motivation toward CH,  
52  
53 three themes emerged: preparing for the future, community relationships, and  
54  
55 psychological effects. Preparing for the future was developed through five experiences  
56  
57  
58  
59  
60

1  
2  
3  
4  
5  
6 (i.e., empathy for the community, grasping the universal demands for CH, understanding  
7  
8  
9 the practices of CH, finding a role model, and conflicts between personal life and career),  
10  
11  
12 evoked three basic psychological needs (i.e., autonomy, competence, and relatedness  
13  
14  
15 needs), and promoted internalization (i.e., introjected, identified, integrated, and intrinsic  
16  
17  
18 regulation). Community relationships evoked autonomy and relatedness needs and  
19  
20  
21 promoted integrated regulation by robustly constructing the internal community, to which  
22  
23  
24 the students belong, and through harmonization with the external community, such as  
25  
26  
27 community residents. Psychological effects, namely affect heuristic and framing effects,  
28  
29  
30 obtained from positive experiences improved students' conceptual image of CH and  
31  
32  
33 directly promoted intrinsic regulation.  
34

35  
36 **Conclusions:** The authors revealed the motivation mechanisms of medical students  
37  
38 toward CH. These mechanisms consisted of the three factors evoking basic psychological  
39  
40 needs and promoting internalization. These mechanisms should be incorporated into  
41  
42  
43 CBME programs to effectively foster CH professionals.  
44  
45  
46  
47  
48  
49  
50  
51

## 52 **Strengths and limitations of this study**

- 53  
54  
55  
56 • This study describes the motivation mechanisms of medical students toward  
57  
58  
59  
60

community healthcare more precisely than previous findings.

- It is unclear whether all medical students will be motivated to participate in community healthcare through similar mechanisms since the study focuses on a specific group of participants.
- Social desirability bias occurring through the relationship between teachers and students cannot be completely eliminated.

## INTRODUCTION

Elderly patients with multimorbidity or irremediable diseases have been increasing in number as global populations age.<sup>1</sup> Thus, the healthcare paradigm has shifted from conventional medical care, which cures diseases at hospitals, to community-based integrated care, which supports patients in the community.<sup>2</sup> These social contexts demand nurturing healthcare professionals with insights into the concept of community healthcare (CH), defined as the integration of health services and social care in the community,<sup>3</sup> who can effectively manage integrated care systems.<sup>4</sup>

Furthermore, the uneven distribution of doctors is a serious global problem. The World Health Organization published global policy recommendations regarding access to health workers,<sup>5</sup> which several countries have adopted to confront this challenge. The

1  
2  
3  
4  
5  
6 Japanese government has implemented a regional quota system (*chiikiwaku*) to manage  
7  
8  
9 this problem.<sup>6</sup> *Chiikiwaku* allows medical students to receive prior benefits (e.g., special  
10  
11  
12 entrance qualifications and scholarships) on the condition they work for a specified  
13  
14  
15 medical institution (especially in rural areas) for a certain period after graduation, during  
16  
17  
18 which they are required to practice CH. In other words, they are required to become  
19  
20  
21 professionals who properly manage integrated care and compensate for the uneven  
22  
23  
24 distribution of doctors. Therefore, *chiikiwaku* students need to deepen their learning of  
25  
26  
27 CH during undergraduate studies. Motivating *chiikiwaku* students to study CH is  
28  
29  
30 necessary to promote proactive learning.  
31

32  
33 Numerous studies have demonstrated that community-based medical education  
34  
35  
36 (CBME) programs, which have been implemented worldwide, improve CH skills<sup>7-10</sup> and  
37  
38  
39 increase motivation toward CH, primary care, and rural practice.<sup>7-17</sup> However, although  
40  
41  
42 the overall effectiveness of these programs has been evaluated, and some educational  
43  
44  
45 components have been described,<sup>18-19</sup> the knowledge of mechanisms that motivate  
46  
47  
48 students to participate in CH are insufficient. Elucidating these mechanisms can provide  
49  
50  
51 significant insights for designing and reconstructing CBME programs to nurturing future  
52  
53  
54 CH physicians. As such, our research objective is to explore the factors and processes that  
55  
56  
57 influence the *chiikiwaku* students' motivation toward CH.  
58  
59  
60



## METHODS

### Participants

We used consecutive sampling to recruit participants until obtaining saturation, i.e. no further themes or constructs could be identified in the analysis.<sup>20</sup> There were 19 *chiikiwaku* students (female = 10, male = 9) in their fifth and sixth years at Kobe University. First, the first author (YS) contacted them by e-mail; then, the students who expressed interest in participating were informed of the details in person. A total of 14 students (73.7%; female = 9, male = 5) agreed to participate. Participants' median (inter-quartile range) age was 23 (23–24); half were fifth-year and the other half sixth-year students. Five participants subjectively recognized their hometown as rural and nine as urban. Written informed consent was obtained from all participants.

### Kobe University *Chiikiwaku*

Candidates who want to join Kobe University's *chiikiwaku* must receive recommendations from graduate high schools and then take the specific entrance examination. After admission, they receive scholarships from the Hyogo prefectural government, which is responsible for securing medical care in Hyogo prefecture's rural areas. They have the obligation to work for nine years post-graduation at rural medical

1  
2  
3  
4  
5  
6 institutions assigned by the prefectural government. These systems are common  
7  
8  
9 throughout Japan, with some differences. *Chiikiwaku* students constitute about 10% of all  
10  
11  
12 Kobe University medical students.  
13  
14  
15

## 16 **Kobe University CBME**

17  
18  
19 All pre-clinical students, including *chiikiwaku* students, attend university CH lectures,  
20  
21  
22 programs at nursing care facilities, and special needs schools. During their clinical years,  
23  
24  
25 they are exposed to home care, and a community-based clerkship program for about two  
26  
27  
28 weeks or one month is available. Additionally, certain special programs are provided  
29  
30  
31 mainly for *chiikiwaku* students: a two-day early exposure program in rural community  
32  
33  
34 clinics, three-day summer program in rural medical institutions, and a health education  
35  
36  
37 program for the elderly in rural areas.  
38  
39  
40  
41

## 42 **Data collection**

43  
44  
45 We used qualitative study methods. We chose individual, in-depth, semi-structured  
46  
47  
48 interviews to delve deeply into interviewees' experiences and co-create meanings by  
49  
50  
51 reconstructing perceptions of experiences.<sup>21</sup> Before the interviews, we prepared the  
52  
53  
54 interview form, including eight questions based on the students' past practical CH-related  
55  
56  
57 experiences (see Supplemental appendix). After a pilot study with one student, it was  
58  
59  
60

1  
2  
3  
4  
5  
6 adapted and confirmed that it had no major matters of concern. YS interviewed all study  
7  
8  
9 participants from September to December 2018. Each interview lasted about 60 minutes  
10  
11  
12 and was audio-recorded and then transcribed by YS.  
13  
14  
15

16 **Supplemental appendix.** Interview form used in the study.  
17

---

- 18 1. What do you think about community healthcare (CH)?
  - 19 2. Why do you think so?
  - 20 3. What were the events that affected your feelings about CH?
  - 21 4. How did the events affect your feelings about CH?
  - 22 5. How does the experience of home care affect your feelings about CH?
  - 23 6. How does the experience of day care/service affect your feelings about CH?
  - 24 7. How does the experience of health education for local residents affect your feelings  
25 about CH?
  - 26 8. How does the experience in the rural area affect your feelings about CH?
  - 27
  - 28
  - 29
  - 30
- 

31  
32  
33  
34  
35 **Data analysis**  
36

37  
38 The transcripts were analyzed following the ‘Steps for Coding and Theorization’ (SCAT)  
39  
40 method.<sup>22</sup> SCAT consists of a four-step coding process: (1) determining focused words  
41  
42 from the segmented text; (2) determining words that can replace the words in (1) with  
43  
44 words from outside of the text; (3) determining words that explain the words in (1) and  
45  
46 (2); and (4) creating themes and constructs, then writing a story-line and generating  
47  
48 theories. These analysis processes were all done in Excel 2013 (Microsoft Corporation,  
49  
50 Redmond, WA, USA). We chose this approach for its usability, process explicitness, and  
51  
52  
53  
54  
55  
56  
57  
58  
59  
60

1  
2  
3  
4  
5  
6 improved reflectability and falsifiability.  
7  
8

9           YS analyzed the data in each step, and a co-researcher (OM) reviewed the  
10 transcripts and analysis results as an inquiry audit. These processes assessed the analysis'  
11 dependability and confirmability.<sup>23</sup>  
12  
13  
14  
15  
16  
17  
18  
19

## 20 **Research paradigm and researcher characteristics**

21  
22 We chose the constructivist paradigm to acknowledge researchers' subjectivities.<sup>24</sup> As  
23 undergraduates, YS and OM were obligated students, such as *chiikiwaku*, then worked at  
24 rural medical institutions for nine years post-graduation. Currently, they engage in  
25 community medicine education and research at the university while practicing at rural  
26 medical institutions.  
27  
28  
29  
30  
31  
32  
33  
34  
35  
36  
37  
38  
39

## 40 **Theoretical framework**

41  
42 Self-determination theory (SDT)<sup>25</sup> was used as the theoretical framework to explore  
43 influencing factors on *chiikiwaku* students' motivation to be involved in CH. This  
44 framework comprises three basic psychological needs: autonomy, competence, and  
45 relatedness. The need for autonomy is a propensity to self-organize experiences and  
46 behaviors. The need for competence refers to a propensity to affect the environment and  
47 attain valued outcomes. The need for relatedness is a propensity to love and care for and  
48  
49  
50  
51  
52  
53  
54  
55  
56  
57  
58  
59  
60

1  
2  
3  
4  
5  
6 be loved and cared for by others. SDT also classifies the regulation types of internalization  
7  
8  
9 related to motivation: external, introjected, identified, integrated, and intrinsic regulations.  
10  
11  
12 External regulation refers to the act being controlled by external contingencies such as  
13  
14  
15 rewards or punishments, for example 'I can earn money providing CH.' Introjected  
16  
17  
18 regulation refers to avoiding guilt or raising self-esteem by internalizing external  
19  
20  
21 pressures, for example 'If I provide CH, I would be praised; if not, I would be looked at  
22  
23  
24 with disdain.' Identified regulation derives from the recognition and acceptance of the  
25  
26  
27 behavior's importance, for example 'I provide CH because it is important.' Integrated  
28  
29  
30 regulation refers to the act of integrating external identifications into other aspects of the  
31  
32  
33 self, for example 'I provide CH because it fits my beliefs.' In intrinsic regulation, the act  
34  
35  
36 itself becomes the purpose with a strong interest, for example 'I provide CH because it is  
37  
38  
39 very interesting.' This regulation type brings the most autonomous motivation.  
40  
41  
42  
43

### 44 **Patient or public involvement**

45  
46 This research was done with partially participants involvement. Participants were not  
47  
48  
49 invited to comment on the study design and methods, however were invited to comment  
50  
51  
52 on the results and editing of this document for readability or accuracy.  
53  
54  
55  
56  
57  
58  
59  
60

## RESULTS

While exploring the factors that influence the *chiikiwaku* students' motivation toward CH, three themes emerged: preparing for the future, community relationships, and psychological effects.

### 1. Preparing for the future

*Chiikiwaku* students prepared for the future through five experiences: 'empathy for the community,' 'grasping the universal demands for CH,' 'understanding the practices of CH,' 'finding a role model,' and 'conflicts between personal life and career.'

#### 1.1 Empathy for the community

Students generated empathy by comparing their own thoughts, living environments, and cultural backgrounds with those of community residents and healthcare professionals through community dialogues and experiences.

I've been to many different areas... When I talk to local people, I can see their lives are not different from those in other areas. I think it's very important to listen to local people. (Student 5, male, rural)

This empathy results from the recognition that there is little difference between them.

1  
2  
3  
4  
5  
6  
7 Even if there were some differences, they still felt empathy.  
8  
9

10 In certain areas I've visited, I heard I couldn't survive without a car. As my  
11  
12  
13  
14  
15  
16  
17  
18  
19  
20  
21  
22  
23  
24  
25  
26  
27  
28  
29  
30  
31  
32  
33  
34  
35  
36  
37  
38  
39  
40  
41  
42  
43  
44  
45  
46  
47  
48  
49  
50  
51  
52  
53  
54  
55  
56  
57  
58  
59  
60  
In certain areas I've visited, I heard I couldn't survive without a car. As my  
parents don't have a car, I could never imagine a life in which a car is  
indispensable. I understood what such a life is like when I went there...It may  
be simply that different people have different lifestyles. (Student 6, female,  
urban)

This empathy created a sense of familiarity and security in the community and reduced  
psychological barriers to continuing to belong to the community in the future. These  
fulfilled the students' 'autonomy needs' to be part of the community.

## 1.2 Grasping the universal demands for CH

Students saw that patients and their families appreciated healthcare professionals and  
directly experienced the community residents' expectations of the students. These  
experiences satisfied 'competence needs,' which involve being evaluated by others, and  
the willingness to commit to this universal demand fulfilled students' 'relatedness needs.'  
These experiences also promoted 'introjected regulation,' 'identified regulation,' and  
'integrated regulation.'

Every individual I saw expressed gratitude to the doctor....It was a good

1  
2  
3  
4  
5  
6 experience. I'm not sure if this will be my life's work, but I thought it would  
7  
8  
9 be nice to commit to this kind of work for a certain period. (Student 14, female,  
10  
11  
12 urban)

13  
14  
15 The residents were kind. I was impressed when they said to me, 'Please come  
16  
17  
18 back.' This experience made me feel that doctors like us are in demand.  
19  
20  
21 (Student 13, male, rural)

22  
23  
24  
25  
26 Conversely, community residents' excessive expectations for students led to  
27  
28  
29 students' fears that they may not be able to fulfill them, which threatened the students'  
30  
31  
32 'autonomy needs.'

33  
34  
35  
36 Of course, I would be glad...if I could actually save people's lives in the  
37  
38  
39 future. That being said, the pressure is too much, I wouldn't be able to do  
40  
41  
42 everything perfectly. Therefore... I feel it would be challenging. (Student 7,  
43  
44  
45 female, urban)

### 46 47 48 49 1.3 Understanding the practices of CH

50  
51  
52 Students understood CH practices such as holistic medical care, comprehensive care,  
53  
54  
55 home care, preventive care, and a community-oriented approach, then imagined their  
56  
57  
58 future practice. Replacing uncertainty about their own future practices with practical  
59  
60



1  
2  
3  
4  
5  
6 knowledge fostered their self-efficacy and satisfied their ‘autonomy needs.’ Furthermore,  
7  
8  
9 if students were interested in these practices, their ‘competence needs’ were stimulated,  
10  
11  
12 which promoted ‘integrated regulation’ or ‘intrinsic regulation.’  
13  
14  
15

16 It goes without saying that I want to do this job. These experiences are really  
17  
18 helpful in that I can now imagine how I would be working in the future. They  
19  
20 were very effective opportunities because I could think about what I need to  
21  
22 know. (Student 12, male, urban)  
23  
24  
25  
26  
27  
28  
29

#### 30 1.4 Finding a role model

31  
32  
33 If the students’ role models’ practices were deemed achievable for students in the future,  
34  
35 their ‘competence needs’ were evoked by their desire to emulate the role model, which  
36  
37 promoted ‘integrated regulation’ or ‘intrinsic regulation.’  
38  
39  
40  
41  
42

43 The doctor was really...the best.... He can be an ideal role model. I’m grateful  
44  
45  
46 I had many opportunities to see the doctor thereafter. I listened to many of his  
47  
48 stories. (Student 5, male, rural)  
49  
50  
51  
52

53 However, this was obstructed if the students thought the role models’ abilities  
54  
55 were beyond their own capacities. Furthermore, their anxiety about carrying out  
56  
57  
58  
59  
60

1  
2  
3  
4  
5  
6  
7  
8  
9  
10  
11  
12  
13  
14  
15  
16  
17  
18  
19  
20  
21  
22  
23  
24  
25  
26  
27  
28  
29  
30  
31  
32  
33  
34  
35  
36  
37  
38  
39  
40  
41  
42  
43  
44  
45  
46  
47  
48  
49  
50  
51  
52  
53  
54  
55  
56  
57  
58  
59  
60

unfeasible practices in the future threatened their self-efficacy and ‘autonomy needs.’

I really admire them. I think they’re great. On the other hand, I’m not confident I can be like them.... There are a lot of genuinely smart doctors and those who are passionate about CH. If I was asked if I have such a strong passion, I don’t have that much passion, so I’m worried if I can actually become a doctor like them. (Student 7, female, urban)

### 1.5 Conflicts between personal life and career

Students felt a potential conflict between their imagined future private lives, including marriage and childcare, and their career ideals (e.g., attaining specialist certifications).

Reducing this conflict secured their ‘autonomy needs’ of daily lives and career choices.

I felt that life events like marriage and having a child will inevitably weaken motivation. That’s why, having listened to Dr. A., I’m glad her talk helped me figure out how I can overcome such challenges. (Student 4, female, urban)

Specialist physician...I have been worried constantly because I don’t know what to do if I became interested in obtaining certification. I mean, I thought I would be far behind if I continued as a *chiikiwaku* physician. However, I’ve heard *chiikiwaku* physicians have been able to obtain specialist

1  
2  
3  
4  
5  
6 certification.... I appreciate this because I no longer have to be worried.  
7  
8

9 (Student 4, female, urban)  
10  
11  
12  
13

## 14 **2. Community relationships**

15  
16

17 Students' relationships with their internal community (i.e., the one to which they belong)  
18  
19 and external community influenced their motivation to be involved in CH.  
20  
21  
22  
23

### 24 2.1 Internal community

25  
26  
27

28 Internal community in this case meant the medical students interested in CH. The sense  
29  
30 of belonging was increased by constructing a robust community and the students' feeling  
31  
32 of belonging to it, which satisfied their 'relatedness needs.'  
33  
34  
35  
36  
37

38 Listening to different views and expectations of CH helps increase motivation.  
39

40 This is because through such experiences, I can feel first-hand that I am part  
41  
42 of a group of people who take CH seriously. (Student 12, male, urban)  
43  
44  
45  
46  
47

48 Furthermore, the community support system made students feel secure. In this  
49  
50 regard, students' affinity with the community of medical doctors had an interesting role.  
51  
52 For some *chiikiwaku* students, their relationships with the local government's  
53  
54 administrative department that has the authority to decide their future working location  
55  
56  
57  
58  
59  
60

1  
2  
3  
4  
5  
6 was perceived as an employee–employer relationship. However, when students realized  
7  
8  
9 there were doctors in the administrative department and that these doctors were involved  
10  
11  
12 in supporting their careers, the feeling of an employee–employer relationship was eased.  
13  
14  
15 This secured their ‘autonomy needs’ regarding career choice.  
16  
17

18  
19 As the government always tells us where to go, I’ve been feeling that I’m  
20  
21 made to work for them. As I didn’t know that certain doctors are working as  
22  
23 government officers, I was thinking that those who don’t know much about  
24  
25 what doctors do are unilaterally deciding what we should do. It was valuable  
26  
27 to learn that the government includes those who understand doctors’ work  
28  
29 and that such people care about our careers and are trying to develop a system  
30  
31 in which we can have equal opportunities. (Student 1, female, urban)  
32  
33  
34  
35  
36  
37  
38  
39  
40  
41

## 42 2.2 External community

43  
44  
45 External community in this case meant both critics of CH and community residents.  
46  
47  
48 Those who criticize CH can decrease students’ motivation. However, if the internal  
49  
50  
51 community functioned in a robust manner and students recognized their own community  
52  
53  
54 belonging, then these conflicts might conversely strengthen their ‘relatedness needs’ and  
55  
56  
57 promote ‘integrated regulation.’  
58  
59  
60

1  
2  
3  
4  
5  
6 From time to time, I came across a doctor who unshakably believes in  
7  
8  
9 specialists. I didn't enjoy listening to such a doctor. ...I would have a myopic  
10  
11  
12 view if I constantly listened to people who keep on saying that community  
13  
14  
15 physicians are better. I would rather like to say I have seen that side and I dare  
16  
17  
18 to have chosen this side. At that time, I felt uncomfortable. Though, in  
19  
20  
21 hindsight, that experience helped me choose the right path. (Student 1, female,  
22  
23  
24 urban)  
25  
26  
27  
28

29 Additionally, as newcomers, students felt anxious about creating relationships  
30  
31  
32 with the community of residents. However, as students recognized that they were  
33  
34  
35 accepted into the community, the external community became an internal community.  
36  
37  
38 Furthermore, community residents' dedication to CH and medical education evoked  
39  
40  
41 students' desires to contribute to the community. This satisfied their 'relatedness needs'  
42  
43  
44 and promoted 'integrated regulation.'  
45  
46  
47

48 As I was very welcomed there, I would like to give back to them by working  
49  
50  
51 hard. ...When they said, 'Is there anything to learn from us?' and 'I would be  
52  
53  
54 more than happy to help you if it would be beneficial,' I felt that I was given  
55  
56  
57 such valuable opportunities to learn. (Student 10, female, urban)  
58  
59  
60

### 3. Psychological effects

Psychological effects, namely the affect heuristic and framing effects, influenced students' motivation to contribute to CH. These psychological effects brought about an improvement in students' conceptual image of CH and promoted 'intrinsic regulation' directly.

#### 3.1 Affect heuristic

This is a psychological effect in which positive or negative emotions affect the judgment of things quickly and automatically.<sup>26</sup> CBME elements such as unique experiences in the community, interaction with others, enjoyable and relaxed practice environments, acquisition of fresh knowledge and skills, and finding a role model induced enjoyable, happy, and positive feelings in students. These positive feelings elicited the affect heuristic, impacting their conceptual image of CH.

For clinical clerkship in university, for example, I have to take training seriously, but the summer program was rather fun, a more harmonious training and hence was quite interesting. (Student 5, male, rural)

### 3.2 Framing effect

This is also a psychological effect in which a positive or negative presentation of something creates a decision-making bias.<sup>27</sup> Showing that CH professionals had an enjoyable work- and lifestyle and describing how rewarding CH can be to students created a framing effect that CH was worthwhile. This affected students' conceptual image of CH.

All doctors look happy there. Every time I go there, I'm reminded they all enjoy working there. Every doctor is thriving there. (Student 4, female, urban)

## DISCUSSION

We explored the factors and processes that influence the *chiikiwaku* students' motivation toward CH using SDT as a theoretical framework. Three main themes and some subthemes emerged: (1) preparing for the future (namely empathy for the community, grasping the universal demands for CH, understanding the practices of CH, finding a role model, and conflicts between personal life and career), (2) community relationships (namely internal and external communities), and (3) psychological effects (namely the affect heuristic and framing effect). These themes and subthemes can have both a positive and negative impact depending on the level of fulfillment of the experiences and whether

1  
2  
3  
4  
5  
6 students accept them.  
7  
8  
9

## 10 **Comparison with previous findings**

11  
12  
13  
14 Previous studies have described the clinical practice factors that influence medical  
15  
16 students' primary care orientations, including broad practice scope,<sup>28-31</sup> role models,<sup>29 30</sup>  
17  
18 <sup>32</sup> specialty,<sup>28 30</sup> work satisfaction,<sup>28 32</sup> lifestyle,<sup>29 30</sup> exposure to different places,<sup>32</sup> and  
19  
20 rural rotation.<sup>32</sup> Some studies have described the clinical practice factors that influence  
21  
22 medical students' orientations toward rural healthcare, including general practice,<sup>33</sup>  
23  
24 clinical skill,<sup>33</sup> patient interaction,<sup>33</sup> role models,<sup>34 35</sup> lifestyle,<sup>33 36</sup> social network,<sup>34</sup> and  
25  
26 informal curriculum.<sup>34</sup> Our study's findings are consistent with these previous findings.  
27  
28  
29 However, the novel significance of our study is that it includes detailed descriptions of  
30  
31 how these factors affected students' motivation.  
32  
33  
34  
35  
36  
37  
38  
39  
40  
41

## 42 **Lessons for CBME programming**

43  
44  
45  
46 How should our results be used when designing and reconstructing CBME programs so  
47  
48 as to effectively foster students' motivation to become involved in CH? We suggest five  
49  
50 possible approaches.  
51  
52  
53

54  
55 First, there should be many opportunities to interact with community residents as  
56  
57 well as patients. This would provide 'empathy for the community,' 'grasping the  
58  
59  
60



1  
2  
3  
4  
5  
6 universal demands for CH,' 'external community relationships,' and a 'positive affect  
7  
8  
9 heuristic.'

10  
11  
12 Second, patients and community residents should be asked to share their  
13  
14 appreciation for healthcare professionals and health-related concerns with students. This  
15  
16 would make 'grasping the universal demands for CH' easier.  
17  
18

19  
20  
21 Third, healthcare professionals should provide positive messages to students  
22  
23 about why they continue their work, how they feel rewarded, what they enjoy in work  
24  
25 and life, and how to deal with conflicts between their private lives and careers. This would  
26  
27 fulfill 'finding a role model' and 'positive framing effect' and reduce 'conflicts between  
28  
29 personal life and career.'  
30  
31  
32  
33  
34

35  
36 Fourth, there should be time for students to interact with each other and have an  
37  
38 enjoyable leisure time. This enhances 'internal community relationships' and elicits a  
39  
40 'positive affect heuristic.'  
41  
42  
43  
44

45  
46 Fifth, there should be time to become familiar with the community environments  
47  
48 and cultures. If these become enjoyable experiences for students, 'empathy for the  
49  
50 community' and a 'positive affect heuristic' will be created.  
51  
52  
53

54  
55 Incorporation of these items into CBME programs may encourage students to  
56  
57 consider CH as a post-graduation option.  
58  
59  
60

## Limitations

There were two limitations in our study. First, study participants were limited to *chiikiwaku* students from a single university. There are many variations in the *chiikiwaku* system, including selection methods, scholarship options, and working style after graduation, among others. *Chiikiwaku* doctors who graduate from Kobe University may work at small medical institutions in rural areas, but some *chiikiwaku* doctors who attended other universities than Kobe may work after graduation at tertiary care medical institutions in the prefectures where their own universities were located. Thus, it is unclear whether all obligated students will be motivated to participate in CH through similar mechanisms. In this regard, further research targeting medical students who belong to other universities or have no obligations are needed.

Second, this study was conducted with students by their teachers. Thus, their hierarchical relationship could be a problem.<sup>37</sup> We cannot completely eliminate the social desirability bias where students give desirable responses to us.<sup>38</sup> To address this problem, some research processes, such as requesting student participation, collecting data, and writing the transcripts, were done only by YS. Although YS is a faculty member, YS has not been involved in the judgment of academic achievement and promotion of participating students. The co-researcher (OM) has been involved in the judgment of

1  
2  
3  
4  
5  
6 students, so he joined the analysis after students' personal identity information was  
7  
8  
9 deleted. We communicated this to the students and made an effort to create an atmosphere  
10  
11  
12 where they could relax and respond freely.  
13  
14  
15

## 16 **CONCLUSIONS**

17  
18  
19 The *chiikiwaku* students developed a motivation to be involved in CH through preparing  
20  
21  
22 for the future, community relationships, and psychological effects that were obtained  
23  
24  
25 from various experiences. These mechanisms should be incorporated into CBME  
26  
27  
28 programs to further encourage students' positive attitudes toward CH.  
29  
30  
31  
32  
33  
34

## 35 **ACKNOWLEDGEMENTS**

36  
37  
38 The authors wish to thank Editage (www.editage.com) for English language editing.  
39  
40

## 41 **COMPETING INTERESTS**

42  
43  
44 The authors report no conflicts of interest. The authors alone are responsible for the  
45  
46  
47 content and writing of the article.  
48  
49

## 50 **FUNDING**

51  
52  
53 This study was supported by Grants-in-Aid for Scientific Research from the Japan Society  
54  
55  
56 for the Promotion of Science (JSPS KAKENHI Grant Number JP16K08870).  
57  
58  
59  
60

## ETHICAL APPROVAL

The Institutional Review Board of Kobe University Graduate School of Medicine approved this study on July 17, 2018 (number 180087).

## CONTRIBUTORS

YS was chiefly responsible for the study design, acquisition, analysis, and interpretation of the data and drafting of the manuscript. OM contributed to the study design, analysis, and interpretation of the data, and a critical revision of the manuscript. TT and KT contributed to the study design and the critical revision of the manuscript. All of the authors approved the final version of the manuscript.

## REFERENCES

1. Marengoni A, Angleman S, Melis R, et al. Aging with multimorbidity: a systematic review of the literature. *Ageing Res Rev* 2011;10(4):430-9. doi: 10.1016/j.arr.2011.03.003 [published Online First: 16 March 2011]
2. Tsutsui T. Implementation process and challenges for the community-based integrated care system in Japan. *Int J Integr Care* 2014;14:e002. doi: 10.5334/ijic.988 [published Online First: 31 January 2014]
3. World Health Organization Centre for Health Development (Kobe, Japan). *A glossary*

- 1  
2  
3  
4  
5  
6  
7 *of terms for community health care and services for older persons. Kobe, Japan:*  
8  
9 *World Health Organization Centre for Health Development. 2004.*  
10  
11  
12 <https://apps.who.int/iris/handle/10665/68896> (accessed 3 April 2020).  
13  
14
- 15 4. Kainuma M, Kikukawa M, Nagata M, et al. Competencies necessary for becoming a  
16  
17 leader in the field of community medicine: a Japanese qualitative interview study.  
18  
19 *BMJ Open* 2018;8(4):e020082. doi: 10.1136/bmjopen-2017-020082 [published  
20  
21  
22 Online First: 19 April 2018]  
23  
24
- 25 5. World Health Organization. (ed.) *Increasing Access to Health Workers in Remote and*  
26  
27 *Rural Areas Through Improved Retention: Global Policy Recommendations.*  
28  
29 Geneva, Switzerland: WHO Press, 2010.  
30  
31  
32  
33  
34
- 35 6. Matsumoto M, Inoue K, Takeuchi K. Quality of care in Japan: an additional strategy.  
36  
37 *Lancet* 2011;378(9807):e17. doi: 10.1016/S0140-6736(11)61841-2 [published  
38  
39  
40  
41  
42 Online First: 6 December 2011]  
43  
44
- 45 7. Barrett FA, Lipsky MS, Lutfiyya MN. The impact of rural training experiences on  
46  
47  
48 medical students: a critical review. *Acad Med* 2011;86(2):259-63. doi:  
49  
50  
51 10.1097/ACM.0b013e3182046387 [published Online First: 21 December 2010]  
52  
53
- 54 8. Kelly L. (ed.) *Community-based medical education: a teacher's handbook.* Radcliffe  
55  
56  
57 Publishing: London, England, 2012.  
58  
59  
60

- 1  
2  
3  
4  
5  
6  
7  
8  
9  
10  
11  
12  
13  
14  
15  
16  
17  
18  
19  
20  
21  
22  
23  
24  
25  
26  
27  
28  
29  
30  
31  
32  
33  
34  
35  
36  
37  
38  
39  
40  
41  
42  
43  
44  
45  
46  
47  
48  
49  
50  
51  
52  
53  
54  
55  
56  
57  
58  
59  
60
9. Crampton PES, McLachlan JC, Illing JC. A systematic literature review of undergraduate clinical placements in underserved areas. *Med Educ* 2013;47(10):969-78. doi: 10.1111/medu.12215 [published Online First: 11 September 2013]
  10. Lee SW, Clement N, Tang N, et al. The current provision of community-based teaching in UK medical schools: an online survey and systematic review. *BMJ Open* 2014;4(12):e005696. doi: 10.1136/bmjopen-2014-005696 [published Online First: 3 December 2014]
  11. Laven G, Wilkinson D. Rural doctors and rural backgrounds: how strong is the evidence? A systematic review. *Aust J Rural Health* 2003;11(6):277-84. doi: 10.1111/j.1440-1584.2003.00534.x [published Online First: 18 December 2003]
  12. Okayama M, Kajii E. Does community-based education increase students' motivation to practice community health care?--a cross sectional study. *BMC Med Educ* 2011;11:19. doi: 10.1186/1472-6920-11-19
  13. Viscomi M, Larkins S, Gupta TS. Recruitment and retention of general practitioners in rural Canada and Australia: a review of the literature. *Can J Rural Med* 2013;18(1):13-23. [published Online First: 25 December 2012]
  14. Pfarrwaller E, Sommer J, Chung C, et al. Impact of Interventions to Increase the

- 1  
2  
3  
4  
5  
6 Proportion of Medical Students Choosing a Primary Care Career: A Systematic  
7  
8  
9 Review. *J Gen Intern Med* 2015;30(9):1349-58. doi: 10.1007/s11606-015-3372-  
10  
11  
12 9 [published Online First: 16 July 2015]  
13  
14
- 15 15. Strasser R, Worley P, Cristobal F, et al. Putting communities in the driver's seat: the  
16  
17 realities of community-engaged medical education. *Acad Med* 2015;90(11):1466-  
18  
19 70. doi: 10.1097/acm.0000000000000765 [published Online First: 29 May 2015]  
20  
21  
22  
23
- 24 16. Budhathoki SS, Zwanikken PA, Pokharel PK, et al. Factors influencing medical  
25  
26 students' motivation to practise in rural areas in low-income and middle-income  
27  
28 countries: a systematic review. *BMJ Open* 2017;7(2):e013501. doi:  
29  
30 10.1136/bmjopen-2016-013501 [published Online First: 25 February 2017]  
31  
32  
33  
34
- 35 17. Johnson GE, Wright FC, Foster K. The impact of rural outreach programs on medical  
36  
37 students' future rural intentions and working locations: a systematic review. *BMC*  
38  
39 *Med Educ* 2018;18(1):196. doi: 10.1186/s12909-018-1287-y [published Online  
40  
41 First: 16 August 2018]  
42  
43  
44  
45  
46  
47
- 48 18. Crampton PES. *Medical student learning during longitudinal clinical placements in*  
49  
50 *under-served, deprived, community areas: A qualitative study*. Doctoral theses.  
51  
52 Durham University; 2015.  
53  
54  
55  
56
- 57 19. Dube TV, Schinke RJ, Strasser R, et al. Transition processes through a longitudinal  
58  
59  
60

- 1  
2  
3  
4  
5  
6 integrated clerkship: a qualitative study of medical students' experiences. *Med*  
7  
8  
9 *Educ* 2015;49(10):1028-37. doi: 10.1111/medu.12797 [published Online First: 19  
10  
11  
12 September 2015]
- 13  
14  
15 20. Saunders B, Sim J, Kingstone T, et al. Saturation in qualitative research: exploring its  
16  
17  
18 conceptualization and operationalization. *Qual Quant* 2018;52(4):1893-907. doi:  
19  
20  
21 10.1007/s11135-017-0574-8 [published Online First: 14 September 2017]  
22  
23
- 24 21. Diccico-Bloom B, Crabtree BF. The qualitative research interview. *Med Educ*  
25  
26  
27 2006;40(4):314-21. doi: 10.1111/j.1365-2929.2006.02418.x [published Online  
28  
29  
30 First: 1 April 2006]  
31  
32
- 33 22. Otani T. "SCAT" A qualitative data analysis method by four-step coding: Easy  
34  
35  
36 startable and small scale data-applicable process of theorization. *Bulletin of the*  
37  
38  
39 *Graduate School of Education and Human Development (Educational Sciences),*  
40  
41  
42 *Nagoya University* 2007;54:27-44 (In Japanese with English abstract).  
43  
44
- 45 23. Polit DF, Beck CT. *Nursing Research: Principles and Methods*. 7th ed. Philadelphia,  
46  
47  
48 PA: Lippincott Williams & Wilkins; 2004.  
49  
50
- 51 24. Denzin NK, Lincoln YS. *The SAGE Handbook of Qualitative Research*. 5th ed.  
52  
53  
54 Thousand Oaks, CA: SAGE Publications; 2017.  
55  
56
- 57 25. Deci EL, Ryan RM. The "What" and "Why" of Goal Pursuits: Human Needs and the  
58  
59  
60



- 1  
2  
3  
4  
5  
6 Self-Determination of Behavior. *Psychol Inq* 2000;11(4):227-68. doi:  
7  
8  
9 10.1207/S15327965PLI1104\_01  
10  
11  
12 26. Finucane ML, Alhakami A, Slovic P, et al. The affect heuristic in judgments of risks  
13 and benefits. *J Behav Decis Mak* 2000;13(1):1-17. doi: 10.1002/(sici)1099-  
14  
15 0771(200001/03)13:1<1::Aid-bdm333>3.0.Co;2-s  
16  
17  
18  
19  
20  
21 27. Tversky A, Kahneman D. The framing of decisions and the psychology of choice.  
22  
23  
24 *Science* 1981;211(4481):453-58. doi: 10.1126/science.7455683  
25  
26  
27 28. Dixon AS, Lam CL, Lam TP. Does a brief clerkship change Hong Kong medical  
28 students' ideas about general practice? *Med Educ* 2000;34(5):339-47. [published  
29  
30 Online First: 12 April 2000]  
31  
32  
33  
34  
35  
36 29. Jordan J, Brown JB, Russell G. Choosing family medicine. What influences medical  
37 students? *Can Fam Physician* 2003;49:1131-7. [published Online First: 7 October  
38  
39 2003]  
40  
41  
42  
43  
44  
45 30. Scott I, Wright B, Brenneis F, et al. Why would I choose a career in family medicine?:  
46 Reflections of medical students at 3 universities. *Can Fam Physician*  
47  
48 2007;53(11):1956-7. [published Online First: 15 November 2007]  
49  
50  
51  
52  
53  
54 31. Ohta R, Ryu Y, Katsube T, et al. Students' perceptions of general medicine following  
55 community-based medical education in rural Japan. *J Gen Fam Med*  
56  
57  
58  
59  
60

- 2019;20(6):236-43. doi: 10.1002/jgf2.274
32. Codsí MP, Rodrigue R, Authier M, et al. Family medicine rotations and medical students' intention to pursue family medicine: Descriptive study. *Can Fam Physician* 2019;65(7):e316-e20. [published Online First: 14 July 2019]
33. Stagg P, Greenhill J, Worley PS. A new model to understand the career choice and practice location decisions of medical graduates. *Rural Remote Health* 2009;9(4):1245. [published Online First: 1 December 2009]
34. Roberts C, Daly M, Kumar K, et al. A longitudinal integrated placement and medical students' intentions to practise rurally. *Med Educ* 2012;46(2):179-91. doi: 10.1111/j.1365-2923.2011.04102.x [published Online First: 14 January 2012]
35. Kawamoto R, Uemoto A, Ninomiya D, et al. Characteristics of Japanese medical students associated with their intention for rural practice. *Rural Remote Health* 2015;15(2):3112. [published Online First: 13 June 2015]
36. Birden HH, Wilson I. Rural placements are effective for teaching medicine in Australia: evaluation of a cohort of students studying in rural placements. *Rural Remote Health* 2012;12:2167. [published Online First: 20 November 2012]
37. Boet S, Sharma S, Goldman J, et al. Review article: medical education research: an overview of methods. *Can J Anaesth* 2012;59(2):159-70. doi: 10.1007/s12630-

1  
2  
3  
4  
5  
6  
7  
8  
9  
10  
11  
12  
13  
14  
15  
16  
17  
18  
19  
20  
21  
22  
23  
24  
25  
26  
27  
28  
29  
30  
31  
32  
33  
34  
35  
36  
37  
38  
39  
40  
41  
42  
43  
44  
45  
46  
47  
48  
49  
50  
51  
52  
53  
54  
55  
56  
57  
58  
59  
60

011-9635-y [published Online First: 5 January 2012]

38. Nederhof AJ. Methods of coping with social desirability bias: A review. *Eur J Soc*

*Psychol* 1985;15(3):263-80. doi: 10.1002/ejsp.2420150303

For peer review only

# Reporting checklist for qualitative study.

Based on the SRQR guidelines.

## Instructions to authors

Complete this checklist by entering the page numbers from your manuscript where readers will find each of the items listed below.

Your article may not currently address all the items on the checklist. Please modify your text to include the missing information. If you are certain that an item does not apply, please write "n/a" and provide a short explanation.

Upload your completed checklist as an extra file when you submit to a journal.

In your methods section, say that you used the SRQR reporting guidelines, and cite them as:

O'Brien BC, Harris IB, Beckman TJ, Reed DA, Cook DA. Standards for reporting qualitative research: a synthesis of recommendations. *Acad Med.* 2014;89(9):1245-1251.

|                              | Reporting Item                                                                                                                                                                                                                                          | Page Number |
|------------------------------|---------------------------------------------------------------------------------------------------------------------------------------------------------------------------------------------------------------------------------------------------------|-------------|
| <b>Title</b>                 |                                                                                                                                                                                                                                                         |             |
|                              | <a href="#">#1</a> Concise description of the nature and topic of the study identifying the study as qualitative or indicating the approach (e.g. ethnography, grounded theory) or data collection methods (e.g. interview, focus group) is recommended | 1           |
| <b>Abstract</b>              |                                                                                                                                                                                                                                                         |             |
|                              | <a href="#">#2</a> Summary of the key elements of the study using the abstract format of the intended publication; typically includes background, purpose, methods, results and conclusions                                                             | 2-3         |
| <b>Introduction</b>          |                                                                                                                                                                                                                                                         |             |
| Problem formulation          | <a href="#">#3</a> Description and significance of the problem / phenomenon studied: review of relevant theory and empirical work; problem statement                                                                                                    | 4-5         |
| Purpose or research question | <a href="#">#4</a> Purpose of the study and specific objectives or questions                                                                                                                                                                            | 5           |

## 1 **Methods**

|    |                              |                     |                                                                    |
|----|------------------------------|---------------------|--------------------------------------------------------------------|
| 2  |                              |                     |                                                                    |
| 3  | Qualitative approach and     | <a href="#">#5</a>  | Qualitative approach (e.g. ethnography, grounded theory, case      |
| 4  | research paradigm            |                     | study, phenomenology, narrative research) and guiding theory if    |
| 5  |                              |                     | appropriate; identifying the research paradigm (e.g.               |
| 6  |                              |                     | postpositivist, constructivist / interpretivist) is also           |
| 7  |                              |                     | recommended; rationale. The rationale should briefly discuss       |
| 8  |                              |                     | the justification for choosing that theory, approach, method or    |
| 9  |                              |                     | technique rather than other options available; the assumptions     |
| 10 |                              |                     | and limitations implicit in those choices and how those choices    |
| 11 |                              |                     | influence study conclusions and transferability. As appropriate    |
| 12 |                              |                     | the rationale for several items might be discussed together.       |
| 13 |                              |                     |                                                                    |
| 14 |                              |                     |                                                                    |
| 15 |                              |                     |                                                                    |
| 16 |                              |                     |                                                                    |
| 17 |                              |                     |                                                                    |
| 18 |                              |                     |                                                                    |
| 19 | Researcher characteristics   | <a href="#">#6</a>  | Researchers' characteristics that may influence the research,      |
| 20 | and reflexivity              |                     | including personal attributes, qualifications / experience,        |
| 21 |                              |                     | relationship with participants, assumptions and / or               |
| 22 |                              |                     | presuppositions; potential or actual interaction between           |
| 23 |                              |                     | researchers' characteristics and the research questions, approach, |
| 24 |                              |                     | methods, results and / or transferability                          |
| 25 |                              |                     |                                                                    |
| 26 |                              |                     |                                                                    |
| 27 |                              |                     |                                                                    |
| 28 |                              |                     |                                                                    |
| 29 | Context                      | <a href="#">#7</a>  | Setting / site and salient contextual factors; rationale           |
| 30 |                              |                     |                                                                    |
| 31 | Sampling strategy            | <a href="#">#8</a>  | How and why research participants, documents, or events were       |
| 32 |                              |                     | selected; criteria for deciding when no further sampling was       |
| 33 |                              |                     | necessary (e.g. sampling saturation); rationale                    |
| 34 |                              |                     |                                                                    |
| 35 |                              |                     |                                                                    |
| 36 |                              |                     |                                                                    |
| 37 | Ethical issues pertaining to | <a href="#">#9</a>  | Documentation of approval by an appropriate ethics review          |
| 38 | human subjects               |                     | board and participant consent, or explanation for lack thereof;    |
| 39 |                              |                     | other confidentiality and data security issues                     |
| 40 |                              |                     |                                                                    |
| 41 |                              |                     |                                                                    |
| 42 | Data collection methods      | <a href="#">#10</a> | Types of data collected; details of data collection procedures     |
| 43 |                              |                     | including (as appropriate) start and stop dates of data collection |
| 44 |                              |                     | and analysis, iterative process, triangulation of sources /        |
| 45 |                              |                     | methods, and modification of procedures in response to             |
| 46 |                              |                     | evolving study findings; rationale                                 |
| 47 |                              |                     |                                                                    |
| 48 |                              |                     |                                                                    |
| 49 |                              |                     |                                                                    |
| 50 | Data collection instruments  | <a href="#">#11</a> | Description of instruments (e.g. interview guides,                 |
| 51 | and technologies             |                     | questionnaires) and devices (e.g. audio recorders) used for data   |
| 52 |                              |                     | collection; if / how the instruments(s) changed over the course    |
| 53 |                              |                     | of the study                                                       |
| 54 |                              |                     |                                                                    |
| 55 |                              |                     |                                                                    |
| 56 |                              |                     |                                                                    |
| 57 | Units of study               | <a href="#">#12</a> | Number and relevant characteristics of participants, documents,    |
| 58 |                              |                     | or events included in the study; level of participation (could be  |
| 59 |                              |                     |                                                                    |
| 60 |                              |                     |                                                                    |

reported in results)

|    |                              |                     |       |
|----|------------------------------|---------------------|-------|
| 1  |                              |                     |       |
| 2  |                              |                     |       |
| 3  | Data processing              | <a href="#">#13</a> | 8-9   |
| 4  |                              |                     |       |
| 5  |                              |                     |       |
| 6  |                              |                     |       |
| 7  |                              |                     |       |
| 8  |                              |                     |       |
| 9  | Data analysis                | <a href="#">#14</a> | 9-10  |
| 10 |                              |                     |       |
| 11 |                              |                     |       |
| 12 |                              |                     |       |
| 13 |                              |                     |       |
| 14 |                              |                     |       |
| 15 | Techniques to enhance        | <a href="#">#15</a> | 9-10  |
| 16 | trustworthiness              |                     |       |
| 17 |                              |                     |       |
| 18 |                              |                     |       |
| 19 |                              |                     |       |
| 20 | <b>Results/findings</b>      |                     |       |
| 21 |                              |                     |       |
| 22 | Syntheses and                | <a href="#">#16</a> | 11    |
| 23 | interpretation               |                     |       |
| 24 |                              |                     |       |
| 25 |                              |                     |       |
| 26 |                              |                     |       |
| 27 |                              |                     |       |
| 28 | Links to empirical data      | <a href="#">#17</a> | 11-20 |
| 29 |                              |                     |       |
| 30 |                              |                     |       |
| 31 | <b>Discussion</b>            |                     |       |
| 32 |                              |                     |       |
| 33 |                              |                     |       |
| 34 | Intergration with prior      | <a href="#">#18</a> | 21    |
| 35 | work, implications,          |                     |       |
| 36 | transferability and          |                     |       |
| 37 | contribution(s) to the field |                     |       |
| 38 |                              |                     |       |
| 39 |                              |                     |       |
| 40 |                              |                     |       |
| 41 |                              |                     |       |
| 42 | Limitations                  | <a href="#">#19</a> | 23-24 |
| 43 |                              |                     |       |
| 44 | <b>Other</b>                 |                     |       |
| 45 |                              |                     |       |
| 46 |                              |                     |       |
| 47 | Conflicts of interest        | <a href="#">#20</a> | 24    |
| 48 |                              |                     |       |
| 49 |                              |                     |       |
| 50 |                              |                     |       |
| 51 | Funding                      | <a href="#">#21</a> | 24    |
| 52 |                              |                     |       |
| 53 |                              |                     |       |

The SRQR checklist is distributed with permission of Wolters Kluwer © 2014 by the Association of American Medical Colleges. This checklist was completed on 11. April 2020 using <https://www.goodreports.org/>, a tool made by the [EQUATOR Network](#) in collaboration with [Penelope.ai](#)

# BMJ Open

## Fostering Student Motivation toward Community Healthcare: A Qualitative Study

|                                 |                                                                                                                                                                                                                                                                                                                                                                                                                                                                                                                                                                                                                                                                             |
|---------------------------------|-----------------------------------------------------------------------------------------------------------------------------------------------------------------------------------------------------------------------------------------------------------------------------------------------------------------------------------------------------------------------------------------------------------------------------------------------------------------------------------------------------------------------------------------------------------------------------------------------------------------------------------------------------------------------------|
| Journal:                        | <i>BMJ Open</i>                                                                                                                                                                                                                                                                                                                                                                                                                                                                                                                                                                                                                                                             |
| Manuscript ID                   | bmjopen-2020-039344.R1                                                                                                                                                                                                                                                                                                                                                                                                                                                                                                                                                                                                                                                      |
| Article Type:                   | Original research                                                                                                                                                                                                                                                                                                                                                                                                                                                                                                                                                                                                                                                           |
| Date Submitted by the Author:   | 22-Aug-2020                                                                                                                                                                                                                                                                                                                                                                                                                                                                                                                                                                                                                                                                 |
| Complete List of Authors:       | Yahata, Shinsuke; Kobe University Graduate School of Medicine School of Medicine, Division of Community Medicine and Medical Education Takeshima, Taro; Fukushima Medical University, Department of General Medicine, Shirakawa Satellite for Teaching and Research (STAR); Fukushima Medical University, Center for Innovative Research for Communities and Clinical Excellence (CIRC2LE) Kenzaka, Tsuneaki; Kobe University Graduate School of Medicine School of Medicine, Division of Community Medicine and Career Development Okayama, Masanobu; Kobe University Graduate School of Medicine School of Medicine, Division of Community Medicine and Medical Education |
| <b>Primary Subject Heading</b>: | Medical education and training                                                                                                                                                                                                                                                                                                                                                                                                                                                                                                                                                                                                                                              |
| Secondary Subject Heading:      | General practice / Family practice                                                                                                                                                                                                                                                                                                                                                                                                                                                                                                                                                                                                                                          |
| Keywords:                       | MEDICAL EDUCATION & TRAINING, PRIMARY CARE, QUALITATIVE RESEARCH                                                                                                                                                                                                                                                                                                                                                                                                                                                                                                                                                                                                            |
|                                 |                                                                                                                                                                                                                                                                                                                                                                                                                                                                                                                                                                                                                                                                             |

SCHOLARONE™  
Manuscripts

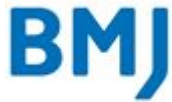

I, the Submitting Author has the right to grant and does grant on behalf of all authors of the Work (as defined in the below author licence), an exclusive licence and/or a non-exclusive licence for contributions from authors who are: i) UK Crown employees; ii) where BMJ has agreed a CC-BY licence shall apply, and/or iii) in accordance with the terms applicable for US Federal Government officers or employees acting as part of their official duties; on a worldwide, perpetual, irrevocable, royalty-free basis to BMJ Publishing Group Ltd ("BMJ") its licensees and where the relevant Journal is co-owned by BMJ to the co-owners of the Journal, to publish the Work in this journal and any other BMJ products and to exploit all rights, as set out in our [licence](#).

The Submitting Author accepts and understands that any supply made under these terms is made by BMJ to the Submitting Author unless you are acting as an employee on behalf of your employer or a postgraduate student of an affiliated institution which is paying any applicable article publishing charge ("APC") for Open Access articles. Where the Submitting Author wishes to make the Work available on an Open Access basis (and intends to pay the relevant APC), the terms of reuse of such Open Access shall be governed by a Creative Commons licence – details of these licences and which [Creative Commons](#) licence will apply to this Work are set out in our licence referred to above.

Other than as permitted in any relevant BMJ Author's Self Archiving Policies, I confirm this Work has not been accepted for publication elsewhere, is not being considered for publication elsewhere and does not duplicate material already published. I confirm all authors consent to publication of this Work and authorise the granting of this licence.



1  
2  
3  
4  
5  
6 **Fostering Student Motivation toward Community Healthcare: A**  
7  
8  
9 **Qualitative Study**  
10

11  
12 Words: 5643  
13

14  
15 Shinsuke Yahata<sup>1</sup>, Taro Takeshima<sup>2</sup>, Tsuneaki Kenzaka<sup>3</sup>, and Masanobu  
16  
17  
18 Okayama<sup>1</sup>  
19

20  
21  
22 *<sup>1</sup>Division of Community Medicine and Medical Education, Kobe University Graduate*  
23  
24 *School of Medicine, Kobe, Japan.*  
25

26  
27  
28  
29 *<sup>2</sup>Department of General Medicine, Shirakawa Satellite for Teaching and Research*  
30  
31 *(STAR), Fukushima Medical University, Fukushima, Japan, and the Center for Innovative*  
32  
33 *Research for Communities and Clinical Excellence (CIRC2LE), Fukushima Medical*  
34  
35 *University, Fukushima, Japan.*  
36  
37

38  
39  
40  
41  
42 *<sup>3</sup>Division of Community Medicine and Career Development, Kobe University Graduate*  
43  
44 *School of Medicine, Kobe, Japan.*  
45

46  
47  
48  
49 *Correspondence: Shinsuke Yahata, Division of Community Medicine and Medical*  
50  
51 *Education, Kobe University Graduate School of Medicine, 2-1-5, Arata-cho, Hyogo-ku,*  
52  
53 *Kobe, Hyogo, 652-0032, Japan; telephone: +81-78-382-6732; e-mail: yahata-*  
54  
55 *jci@umin.ac.jp.*  
56  
57  
58  
59  
60

1  
2  
3  
4  
5  
6  
7  
8  
9  
10  
11  
12  
13  
14  
15  
16  
17  
18  
19  
20  
21  
22  
23  
24  
25  
26  
27  
28  
29  
30  
31  
32  
33  
34  
35  
36  
37  
38  
39  
40  
41  
42  
43  
44  
45  
46  
47  
48  
49  
50  
51  
52  
53  
54  
55  
56  
57  
58  
59  
60

Keywords: community healthcare, community-based medical education, self-determination theory, expectancy-value theories, emotions

## ABSTRACT

**Objectives:** This study investigated what kinds of experiences influence regional quota (*chiikiwaku*) medical students' motivation to practice community healthcare (CH), and the mechanism of this influence, by focusing on their experiences in a community-based medical education (CBME) program.

**Design:** A qualitative thematic analysis based on interviews.

**Setting:** Participants were recruited from the *chiikiwaku* students of Kobe University, Japan, using purposive sampling.

**Participants:** Fourteen students participated. The median (inter-quartile range) age of participants was 23 (23-24); half were sixth-year and half fifth-year students.

**Methods:** From September to December 2018, the interviews were audio-recorded and transcribed verbatim. Data were analyzed according to the "Steps for Coding and Theorization" method. Our theoretical framework comprised three internal motives (i.e., needs, cognitions, and emotions) and their subordinate motivation theories self-determination theory, expectancy-value theories, and positive and negative emotions, respectively, were.

1  
2  
3  
4  
5  
6  
7 **Results:** Three mechanisms and corresponding experiences emerged: (1) envisioning and  
8  
9 preparing for practicing CH (empathy for the community, grasping the demands of CH,  
10  
11 understanding the practices of CH, finding a role model, and diminishing the conflicts  
12  
13 between personal life and career), (2) belonging to a supportive community (robust  
14  
15 construction of students' community for CH and harmonization with community  
16  
17 residents), and (3) heuristics and biases (the affect heuristic and framing effect). Student  
18  
19 experiences brought about the changes and influences described in the presented  
20  
21 mechanisms, and had both positive and negative impacts on their motivation toward CH.  
22  
23  
24  
25  
26  
27  
28  
29  
30  
31  
32 These results can be interpreted through the multifaceted lenses of motivation theories.

33  
34 **Conclusions:** The authors revealed the motivation mechanisms of medical students  
35  
36 toward CH, many of which derived from positive interaction with community residents,  
37  
38 healthcare professionals, and other students, and from exposure to attractive community  
39  
40 environments and cultures. These experiences should be incorporated into CBME  
41  
42 programs to further encourage positive attitudes toward CH.  
43  
44  
45  
46  
47  
48  
49  
50  
51

## 52 **Strengths and limitations of this study**

- 53  
54  
55  
56 • This study precisely describes the motivation mechanisms of medical students  
57  
58  
59  
60

1  
2  
3  
4  
5  
6 toward practicing community healthcare.

- 7  
8  
9
- 10 • It is unclear whether all medical students will be motivated to participate in  
11  
12 community healthcare through similar mechanisms since the study focuses on a  
13  
14 specific group of participants.
  - 15  
16 • Social desirability bias occurring through the relationship between teachers and  
17  
18 students cannot be completely eliminated.  
19  
20  
21  
22  
23  
24

## 25 26 **INTRODUCTION**

27  
28  
29 Elderly patients with multimorbidity or irremediable diseases have been increasing in  
30  
31 number as global populations age.<sup>1</sup> Thus, the healthcare paradigm has shifted from  
32  
33 conventional medical care, which cures diseases at hospitals, to community-based  
34  
35 integrated care, which supports patients in the community.<sup>2</sup> These social contexts demand  
36  
37 nurturing healthcare professionals with insights into the concept of community healthcare  
38  
39 (CH), defined as the integration of health services and social care in the community,<sup>3</sup> who  
40  
41 can effectively manage integrated care systems.<sup>4</sup> In addition, the impact of the COVID-  
42  
43  
44  
45  
46  
47  
48  
49  
50  
51  
52  
53  
54  
55  
56  
57  
58  
59  
60  
19 pandemic has highlighted the division between hospital and primary care. There is no  
doubt that in the case where a patient needs a ventilator, the hospital is the appropriate  
location. Nevertheless, it has also been shown that primary healthcare also has an essential

1  
2  
3  
4  
5  
6 role to play in fighting acute infectious diseases.  
7  
8

9  
10 Furthermore, the uneven distribution of physician manpower among regions in a  
11  
12 single country is a serious global problem. The World Health Organization published  
13  
14 global policy recommendations regarding access to health workers,<sup>5</sup> which several  
15  
16 countries have adopted to confront this challenge. The Japanese government has  
17  
18 implemented a regional quota system (*chiikiwaku*) to manage this problem.<sup>6</sup> *Chiikiwaku*  
19  
20 allows medical students to receive prior benefits (e.g., special entrance qualifications and  
21  
22 scholarships) on the condition they work for a specified medical institution (especially in  
23  
24 rural areas) for a certain period after graduation, during which they are required to practice  
25  
26 CH. In other words, they are required to become professionals who properly manage  
27  
28 integrated care and compensate for the uneven distribution of doctors. However, it has  
29  
30 been reported that the willingness of *chiikiwaku* students to remain in medically  
31  
32 underserved areas declines from 52.3% to 19.2% during their studies.<sup>7</sup> Withdrawal from  
33  
34 the *chiikiwaku* system, which was reported to be about 10%, is also a problem.<sup>8</sup> Moreover,  
35  
36 the preference for a primary care career, which is necessary for practicing CH, may  
37  
38 decrease during medical school.<sup>9 10</sup> Therefore, it is necessary to continuously encourage  
39  
40 *chiikiwaku* students, while they are undergraduates, to maintain and improve their  
41  
42 motivation for practicing CH.  
43  
44  
45  
46  
47  
48  
49  
50  
51  
52  
53  
54  
55  
56  
57  
58  
59  
60

1  
2  
3  
4  
5  
6  
7 Numerous studies have demonstrated that community-based medical education  
8  
9 (CBME) programs, which have been implemented worldwide, improve CH skills<sup>11-14</sup> and  
10  
11 increase motivation toward CH, primary care, and rural practice.<sup>11 13-21</sup> However,  
12  
13 although the overall effectiveness of these programs has been evaluated, and some  
14  
15 educational components have been described,<sup>22 23</sup> the knowledge of mechanisms that  
16  
17 motivate students to participate in CH is insufficient. Elucidating these mechanisms can  
18  
19 provide significant insights for designing and reconstructing CBME programs to nurture  
20  
21 future CH physicians. As such, our research objective is to retrospectively investigate  
22  
23 what kind of experiences influenced their motivation for practicing CH, and the  
24  
25 mechanism of this influence, by focusing on the lived experiences of *chiikiwaku* students  
26  
27 in CBME programs.  
28  
29  
30  
31  
32  
33  
34  
35  
36  
37  
38  
39  
40

## 41 **METHODS**

### 42 **Qualitative approach and research paradigm**

43  
44  
45 We conducted a qualitative thematic analysis using interview data. The  
46  
47 Standards for Reporting Qualitative Research (SRQR)<sup>24</sup> were adopted for the presentation  
48  
49 of our research. We chose the constructivism paradigm to interpret and understand the  
50  
51 meanings of students' experiences.<sup>25</sup>  
52  
53  
54  
55  
56  
57  
58  
59  
60

1  
2  
3  
4  
5  
6  
7 To interpret how students' experiences influenced their motivation for practicing  
8  
9 CH, we used Reeve's concept of three internal motives,<sup>26</sup> and some additional motivation  
10  
11 theories, were the foundation for our theoretical framework. There are numerous  
12  
13 motivation theories; however, some confusion has arisen from their diversity because of  
14  
15 their conceptual overlaps and disagreements.<sup>27</sup> In other words, there is no one theory that  
16  
17 can absolutely explain human motivation. We addressed this issue by using the concepts  
18  
19 of three internal motives based on their clarity. Reeve defines "motivation" as "a condition  
20  
21 inside us that desires a change" and proposes three internal motives for action: needs,  
22  
23 cognitions, and emotions. We considered "student motivation toward CH" as "a condition  
24  
25 inside students that they desire to practice CH" and adopted these three internal motives  
26  
27 as a framework. In addition, in order to explain the three internal motives in detail, we  
28  
29 used self-determination theory (SDT),<sup>28</sup> expectancy-value theories (EVT),<sup>29</sup> and positive  
30  
31 and negative emotions<sup>30</sup> as subordinate guiding theories. We chose SDT and EVT  
32  
33 because they are current, widely recognized theories.<sup>27 31-33</sup> Emotions have been  
34  
35 characterized as feeling-arousal-purposive-expressive phenomena, whose components  
36  
37 cooperate in a complicated manner and allow us to react adaptively to the important  
38  
39 events in our lives.<sup>26</sup> For the purposes of our study, in order to express them more simply,  
40  
41 we adopted six positive and six negative emotions.<sup>30</sup>  
42  
43  
44  
45  
46  
47  
48  
49  
50  
51  
52  
53  
54  
55  
56  
57  
58  
59  
60

1  
2  
3  
4  
5  
6 SDT, which is involved in needs, comprises three basic psychological needs:  
7  
8  
9 autonomy, competence, and relatedness.<sup>28</sup> The need for autonomy is a tendency to self-  
10  
11  
12 organize experiences and behaviors. The need for competence refers to a desire to affect  
13  
14  
15 the environment and attain valued outcomes. Finally, the need for relatedness is a  
16  
17  
18 tendency to love and care for and be loved and cared for by others. SDT also classifies  
19  
20  
21 the regulation types related to motivation: external, introjected, identified, integrated, and  
22  
23  
24 intrinsic regulations.<sup>28</sup> External regulation refers to the act of being controlled by external  
25  
26  
27 contingencies such as rewards or punishments. Introjected regulation refers to avoiding  
28  
29  
30 guilt or raising self-esteem by internalizing external pressures. Identified regulation  
31  
32  
33 derives from the recognition and acceptance of the behavior's importance. Integrated  
34  
35  
36 regulation refers to the act of integrating external identifications into other aspects of the  
37  
38  
39 self. In intrinsic regulation, the act itself becomes the purpose with a strong motivation.  
40  
41  
42 This regulation type leads to the most autonomous motivation.  
43  
44

45  
46 EVT, which is involved in cognitions, consists of two important independent  
47  
48  
49 factors that influence behavior: expectation of success and subjective task value. The  
50  
51  
52 expectation of success is the belief that one will succeed in one's tasks. The subjective  
53  
54  
55 task value comprises attainment value, utility value, and cost.<sup>29</sup>  
56

57  
58 Regarding emotions, we defined six positive emotions as enthusiasm,  
59  
60



1  
2  
3  
4  
5  
6 cheerfulness, optimism, contentedness, calmness, and relaxation, and negative emotions  
7  
8  
9 were tension, gloominess, depression, worry, miserableness, and uneasiness.<sup>30</sup> These  
10  
11  
12 frameworks were adopted to analyze the students' experiences and facilitate the  
13  
14  
15 interpretation of what their effects were on motivation and the mechanisms by which they  
16  
17  
18 operated. Using multiple theories encourages a deeper understanding of motivational  
19  
20  
21 principles.<sup>27</sup>  
22  
23  
24  
25

### 26 **Researcher characteristics and reflexivity**

27  
28  
29 As undergraduates, all researchers in this study were obligated students who then worked  
30  
31  
32 at rural medical institutions for nine years post-graduation. Currently, they engage in  
33  
34  
35 community medicine education and research at the university while practicing at rural  
36  
37  
38 medical institutions.  
39  
40

41  
42 Additionally, YS and OM taught the research participants. Their hierarchical  
43  
44 relationship<sup>34</sup> could have resulted in the social desirability bias whereby students are  
45  
46  
47 motivated to respond in ways they think may be desirable to their teachers.<sup>35</sup> To address  
48  
49  
50 this problem, some research processes, such as requesting student participation, collecting  
51  
52  
53 data, and writing the transcripts, were done only by YS. Although YS is a faculty member,  
54  
55  
56 YS has not been involved in the judgment of academic achievement and promotion of  
57  
58  
59  
60

1  
2  
3  
4  
5  
6 participating students. The co-researcher (OM) has been involved in the judgment of  
7  
8  
9 students, so he joined the analysis after students' personal identity information was  
10  
11  
12 deleted. We communicated this to the students and made an effort to create an atmosphere  
13  
14  
15 where they could relax and respond freely. The other co-researchers (TT and KT) were  
16  
17  
18 not involved in the research processes described above.  
19  
20  
21  
22

### 23 **Research context**

24  
25  
26 Kobe University *Chiikiwaku*  
27

28  
29 This research was conducted at Kobe University. Candidates who want to join Kobe  
30  
31  
32 University's *chiikiwaku* program must receive recommendations from graduate high  
33  
34  
35 schools and then take the specific entrance examination. They can only apply to the  
36  
37  
38 program before admission. After admission, they receive scholarships from the Hyogo  
39  
40  
41 prefectural government, which is responsible for securing medical care in Hyogo  
42  
43  
44 prefecture's rural areas. They have the obligation to work for nine years post-graduation  
45  
46  
47 at rural medical institutions assigned by the prefectural government. These systems are  
48  
49  
50 common throughout Japan, with some differences. *Chiikiwaku* students comprise about  
51  
52  
53 10% of all Kobe University medical students.  
54  
55  
56  
57  
58  
59  
60

## Kobe University CBME

All pre-clinical students, including *chiikiwaku* students, attend university CH lectures, programs at nursing care facilities, and special needs schools. During their clinical years, they are exposed to home care, and a community-based clerkship program for about two weeks or one month is available. Additionally, certain special programs are provided mainly for *chiikiwaku* students: a two-day early exposure program in rural community clinics, a three-day summer program in rural medical institutions, and a health education program for the elderly in rural areas.

## Participants

We used purposive sampling<sup>36</sup> in order to focus on the mechanisms through which *chiikiwaku* students maintained and improved their motivation for practicing CH. We recruited fifth- or sixth-year *chiikiwaku* students at Kobe University as research participants. We selected fifth- or sixth-year students (i.e., students in their clinical years) to effectively collect rich experiences related to CH. There were 19 *chiikiwaku* students who satisfied the selection criteria. We could not predetermine the required sample size. However, using rough rules of thumb, it was judged that 12 to 26 participants could be considered appropriate,<sup>37</sup> and so we estimated that it would be possible to carry out the

1  
2  
3  
4  
5  
6 research using the selected criteria. We continued sampling until obtaining saturation, i.e.,  
7  
8  
9 no further themes or constructs could be identified in the analysis.<sup>38</sup>  
10  
11

12 As a practical procedure, the first author (YS) emailed the first participant who  
13  
14 was randomly selected from the target groups that satisfied the selection criteria; then, if  
15  
16 this student expressed an interest in participating, they were informed of the details in  
17  
18 person and gave their written informed consent. After collecting and analyzing their data,  
19  
20  
21  
22  
23  
24 YS contacted the next participant in a similar manner.  
25  
26  
27

## 28 **Data collection**

29  
30  
31 We chose individual, in-depth, semi-structured interviews that allowed us to delve deeply  
32  
33 into interviewees' experiences in order to acquire concrete descriptions.<sup>25</sup> Before the  
34  
35 interviews, we prepared the interview guide, including eight questions based on the  
36  
37 students' past practical CH-related experiences (see Supplemental Appendix). This guide  
38  
39 was used as a pilot guide and was intended to be revised as the study progressed; in the  
40  
41 end it was not revised because a sufficient quantity of descriptions by interviewees was  
42  
43  
44  
45  
46  
47  
48  
49  
50  
51  
52  
53  
54  
55  
56  
57  
58  
59  
60  
61  
62  
63  
64  
65  
66  
67  
68  
69  
70  
71  
72  
73  
74  
75  
76  
77  
78  
79  
80  
81  
82  
83  
84  
85  
86  
87  
88  
89  
90  
91  
92  
93  
94  
95  
96  
97  
98  
99  
100  
101  
102  
103  
104  
105  
106  
107  
108  
109  
110  
111  
112  
113  
114  
115  
116  
117  
118  
119  
120  
121  
122  
123  
124  
125  
126  
127  
128  
129  
130  
131  
132  
133  
134  
135  
136  
137  
138  
139  
140  
141  
142  
143  
144  
145  
146  
147  
148  
149  
150  
151  
152  
153  
154  
155  
156  
157  
158  
159  
160  
161  
162  
163  
164  
165  
166  
167  
168  
169  
170  
171  
172  
173  
174  
175  
176  
177  
178  
179  
180  
181  
182  
183  
184  
185  
186  
187  
188  
189  
190  
191  
192  
193  
194  
195  
196  
197  
198  
199  
200  
201  
202  
203  
204  
205  
206  
207  
208  
209  
210  
211  
212  
213  
214  
215  
216  
217  
218  
219  
220  
221  
222  
223  
224  
225  
226  
227  
228  
229  
230  
231  
232  
233  
234  
235  
236  
237  
238  
239  
240  
241  
242  
243  
244  
245  
246  
247  
248  
249  
250  
251  
252  
253  
254  
255  
256  
257  
258  
259  
260  
261  
262  
263  
264  
265  
266  
267  
268  
269  
270  
271  
272  
273  
274  
275  
276  
277  
278  
279  
280  
281  
282  
283  
284  
285  
286  
287  
288  
289  
290  
291  
292  
293  
294  
295  
296  
297  
298  
299  
300  
301  
302  
303  
304  
305  
306  
307  
308  
309  
310  
311  
312  
313  
314  
315  
316  
317  
318  
319  
320  
321  
322  
323  
324  
325  
326  
327  
328  
329  
330  
331  
332  
333  
334  
335  
336  
337  
338  
339  
340  
341  
342  
343  
344  
345  
346  
347  
348  
349  
350  
351  
352  
353  
354  
355  
356  
357  
358  
359  
360  
361  
362  
363  
364  
365  
366  
367  
368  
369  
370  
371  
372  
373  
374  
375  
376  
377  
378  
379  
380  
381  
382  
383  
384  
385  
386  
387  
388  
389  
390  
391  
392  
393  
394  
395  
396  
397  
398  
399  
400  
401  
402  
403  
404  
405  
406  
407  
408  
409  
410  
411  
412  
413  
414  
415  
416  
417  
418  
419  
420  
421  
422  
423  
424  
425  
426  
427  
428  
429  
430  
431  
432  
433  
434  
435  
436  
437  
438  
439  
440  
441  
442  
443  
444  
445  
446  
447  
448  
449  
450  
451  
452  
453  
454  
455  
456  
457  
458  
459  
460  
461  
462  
463  
464  
465  
466  
467  
468  
469  
470  
471  
472  
473  
474  
475  
476  
477  
478  
479  
480  
481  
482  
483  
484  
485  
486  
487  
488  
489  
490  
491  
492  
493  
494  
495  
496  
497  
498  
499  
500  
501  
502  
503  
504  
505  
506  
507  
508  
509  
510  
511  
512  
513  
514  
515  
516  
517  
518  
519  
520  
521  
522  
523  
524  
525  
526  
527  
528  
529  
530  
531  
532  
533  
534  
535  
536  
537  
538  
539  
540  
541  
542  
543  
544  
545  
546  
547  
548  
549  
550  
551  
552  
553  
554  
555  
556  
557  
558  
559  
560  
561  
562  
563  
564  
565  
566  
567  
568  
569  
570  
571  
572  
573  
574  
575  
576  
577  
578  
579  
580  
581  
582  
583  
584  
585  
586  
587  
588  
589  
590  
591  
592  
593  
594  
595  
596  
597  
598  
599  
600  
601  
602  
603  
604  
605  
606  
607  
608  
609  
610  
611  
612  
613  
614  
615  
616  
617  
618  
619  
620  
621  
622  
623  
624  
625  
626  
627  
628  
629  
630  
631  
632  
633  
634  
635  
636  
637  
638  
639  
640  
641  
642  
643  
644  
645  
646  
647  
648  
649  
650  
651  
652  
653  
654  
655  
656  
657  
658  
659  
660  
661  
662  
663  
664  
665  
666  
667  
668  
669  
670  
671  
672  
673  
674  
675  
676  
677  
678  
679  
680  
681  
682  
683  
684  
685  
686  
687  
688  
689  
690  
691  
692  
693  
694  
695  
696  
697  
698  
699  
700  
701  
702  
703  
704  
705  
706  
707  
708  
709  
710  
711  
712  
713  
714  
715  
716  
717  
718  
719  
720  
721  
722  
723  
724  
725  
726  
727  
728  
729  
730  
731  
732  
733  
734  
735  
736  
737  
738  
739  
740  
741  
742  
743  
744  
745  
746  
747  
748  
749  
750  
751  
752  
753  
754  
755  
756  
757  
758  
759  
760  
761  
762  
763  
764  
765  
766  
767  
768  
769  
770  
771  
772  
773  
774  
775  
776  
777  
778  
779  
780  
781  
782  
783  
784  
785  
786  
787  
788  
789  
790  
791  
792  
793  
794  
795  
796  
797  
798  
799  
800  
801  
802  
803  
804  
805  
806  
807  
808  
809  
810  
811  
812  
813  
814  
815  
816  
817  
818  
819  
820  
821  
822  
823  
824  
825  
826  
827  
828  
829  
830  
831  
832  
833  
834  
835  
836  
837  
838  
839  
840  
841  
842  
843  
844  
845  
846  
847  
848  
849  
850  
851  
852  
853  
854  
855  
856  
857  
858  
859  
860  
861  
862  
863  
864  
865  
866  
867  
868  
869  
870  
871  
872  
873  
874  
875  
876  
877  
878  
879  
880  
881  
882  
883  
884  
885  
886  
887  
888  
889  
890  
891  
892  
893  
894  
895  
896  
897  
898  
899  
900  
901  
902  
903  
904  
905  
906  
907  
908  
909  
910  
911  
912  
913  
914  
915  
916  
917  
918  
919  
920  
921  
922  
923  
924  
925  
926  
927  
928  
929  
930  
931  
932  
933  
934  
935  
936  
937  
938  
939  
940  
941  
942  
943  
944  
945  
946  
947  
948  
949  
950  
951  
952  
953  
954  
955  
956  
957  
958  
959  
960  
961  
962  
963  
964  
965  
966  
967  
968  
969  
970  
971  
972  
973  
974  
975  
976  
977  
978  
979  
980  
981  
982  
983  
984  
985  
986  
987  
988  
989  
990  
991  
992  
993  
994  
995  
996  
997  
998  
999  
1000

There were 19 fifth- or sixth-year *chiikiwaku* students (female = 10, male = 9) at

1  
2  
3  
4  
5  
6 Kobe University. Everyone who received the request kindly agreed to participate. Finally,  
7  
8  
9 a total of 14 students (73.7%; female = 9, male = 5) participated (i.e., theoretical saturation  
10  
11  
12 was reached after 14 students had been interviewed, at which point the interviews were  
13  
14  
15 concluded). Participants' median (inter-quartile range) age was 23 (23–24); half were  
16  
17  
18 fifth-year and the other half sixth-year students. Five participants subjectively recognized  
19  
20  
21 their hometown as rural and nine as urban.  
22  
23  
24  
25  
26  
27  
28

## 29 **Data analysis**

30  
31  
32 The transcripts were analyzed following the “Steps for Coding and Theorization” (SCAT)  
33  
34  
35 method, which is a grounded theory-inspired thematic analytical approach.<sup>39</sup> SCAT  
36  
37  
38 consists of a four-step coding process. As a preliminary preparation, the text of the  
39  
40  
41 transcript is segmented properly on a per-speech basis. Then, (1) determining focused  
42  
43  
44 words from the segmented text: identifying the important words (codes) from the  
45  
46  
47 segmented text. (2) Determining words that can replace the words in step (1) with words  
48  
49  
50 external to the text: writing other codes that represent the meanings of the codes in step  
51  
52  
53 (1). (3) Determining words that explain the words in steps (1) and (2): writing other codes  
54  
55  
56 that can explain the codes in step (1) and (2) while considering the context of the entire  
57  
58  
59  
60

1  
2  
3  
4  
5  
6 data. (4) Creating themes and constructs: reading the product of steps (1) to (3) carefully  
7  
8  
9 and drawing out new themes and constructs.  
10

11  
12 The next step is writing a story line, which was defined by Otani as a "description  
13  
14 of the latent meanings of the events described in the data by piecing the themes mainly  
15  
16 described in step (4)." Through the process of decontextualizing and recontextualizing  
17  
18 the data, the "deep context" of the data can be obtained from their "surface context."  
19  
20  
21 Finally, theories are generated by fragmenting the story line to discover new theories.  
22  
23  
24 According to Otani, the theories identified in this process are "not something that is  
25  
26  
27 universal and generally accepted, but what can be said from this data."  
28  
29  
30  
31  
32  
33

34 To facilitate an understanding of the analysis process of SCAT, Otani described  
35  
36 practical examples<sup>39</sup> using the text from Akatsu<sup>40</sup>: "Auscultation of Heart Sounds Taught  
37  
38 by Body." We summarized and introduced one part of the analysis process. The  
39  
40 fragmented data were "*The professor began to undress on the platform. Everyone was*  
41  
42 *taken aback. Then, on his chest, an image of heart and blood vessels appeared. Everyone*  
43  
44 *cheered and applauded.*" Step (1): he focused on "*professor,*" "*image of heart and blood*  
45  
46 *vessels appeared,*" and "*cheered and applauded.*" Step (2): he replaced each word to  
47  
48 "*authoritative teacher,*" "*overlaying reality with teaching materials,*" "*surprise teaching*  
49  
50 *material presentation,*" and "*students' surprise and pleasure.*" Step (3): he determined  
51  
52  
53  
54  
55  
56  
57  
58  
59  
60

1  
2  
3  
4  
5  
6 the words “*superimposition of real body and picture*” and “*element of surprise*” Step (4):  
7  
8  
9 he created the themes and constructs of “*modeling reality*,” “*layer presentation of reality*  
10  
11  
12  
13  
14  
15  
16 Writing a story line: he wrote that “*this professor turned his body into a type of teaching*  
17  
18  
19  
20  
21  
22  
23  
24  
25  
26  
27  
28  
29  
30  
31  
32  
33  
34  
35  
36  
37  
38  
39  
40  
41  
42  
43  
44  
45  
46  
47  
48  
49  
50  
51  
52  
53  
54  
55  
56  
57  
58  
59  
60

the words “*superimposition of real body and picture*” and “*element of surprise*” Step (4):

he created the themes and constructs of “*modeling reality*,” “*layer presentation of reality and teaching materials*,” and “*extracting motivation and expectations based on surprise*.”

Writing a story line: he wrote that “*this professor turned his body into a type of teaching material in a surprising way and realized a learning process that included surprises*.”

Generating theory: he generated the theories “*the use of one’s body in medical education can leave a strong impression on learners*.”

As such, we have described the final themes by organizing the theories that emerged through analysis. The process of going back and forth between steps (1) and (4) and reading them repeatedly improves the quality and depth of the analyst’s reflection. Furthermore, the explicit description of the analytic process allowed the readers to falsify the result. These analysis processes were all done in Excel 2013 (Microsoft Corporation, Redmond, WA, USA). We chose this approach for its usability, process explicitness, and improved reflectability and falsifiability.

YS analyzed the data in each step, and a co-researcher (OM) reviewed the transcripts and analysis results.

## **Patient or public involvement**

This research was conducted with partial participant involvement. Participants were not

1  
2  
3  
4  
5  
6 invited to comment on the study design and methods. However, they were emailed their  
7  
8  
9 own transcripts and analysis results, and invited to comment on them. Four commented  
10  
11  
12 via email or face-to-face, and confirmed that there were no issues in the readability and  
13  
14  
15 accuracy of the transcripts and the results obtained from them. This process strengthened  
16  
17  
18 the overall credibility of the study.<sup>36</sup>  
19  
20  
21  
22  
23

## 24 RESULTS

25  
26  
27 While exploring the details of what kind of experiences influence *chiikiwaku* students'  
28  
29  
30 motivation for practicing CH and the mechanisms of this influence, three mechanisms  
31  
32  
33 and corresponding experiences emerged as the final themes. First, envisioning and  
34  
35  
36 preparing for practicing CH (comprising corresponding experiences of empathy for the  
37  
38  
39 community, grasping the demands for CH, understanding the practices of CH, finding a  
40  
41  
42 role model, and diminishing the conflicts between personal life and career); second,  
43  
44  
45 belonging to a supportive community (comprising robust construction of students'  
46  
47  
48 community for CH and harmonization with community residents); and third, heuristics  
49  
50  
51 and biases (affect heuristic and framing effects). The corresponding experiences brought  
52  
53  
54 about the changes and influences described in the presented mechanism and had both a  
55  
56  
57 positive and negative impact on students' motivation toward CH, depending on the level  
58  
59  
60



1  
2  
3  
4  
5  
6 of fulfillment obtained through the experiences and whether students were able to accept  
7  
8  
9 them.

## 10 11 12 13 14 **1. Envisioning and preparing for practicing CH**

15  
16  
17 *Chiikiwaku* students envisioned and prepared for their future practice of CH through five  
18  
19 experiences: “empathy for the community,” “grasping the demands for CH,”  
20  
21 “understanding the practices of CH,” “finding a role model,” and “diminishing the  
22  
23 conflicts between personal life and career.”  
24  
25  
26  
27

### 28 29 30 1.1 Empathy for the community

31  
32  
33 Students generated empathy by comparing their own thoughts, living environments, and  
34  
35 cultural backgrounds with those of community residents and healthcare professionals  
36  
37 through community dialogues and experiences.  
38  
39  
40

41  
42  
43 I’ve been to many different areas...When I talk to local people, I can see their  
44  
45 lives are not different from those in other areas. I think it’s very important to  
46  
47 listen to local people. (Student 5, male, rural)  
48  
49  
50

51  
52  
53 This empathy results from the recognition that there is little difference between them.  
54  
55  
56  
57 Even if there were some differences, they still felt empathy.  
58  
59  
60

1  
2  
3  
4  
5  
6 In certain areas I've visited, I heard I couldn't survive without a car. As my  
7  
8  
9  
10  
11  
12  
13  
14  
15  
16  
17  
18  
19  
20  
21  
22  
23  
24  
25  
26  
27  
28  
29  
30  
31  
32  
33  
34  
35  
36  
37  
38  
39  
40  
41  
42  
43  
44  
45  
46  
47  
48  
49  
50  
51  
52  
53  
54  
55  
56  
57  
58  
59  
60

In certain areas I've visited, I heard I couldn't survive without a car. As my parents don't have a car, I could never imagine a life in which a car is indispensable. I understood what such a life is like when I went there...It may be simply that different people have different lifestyles. (Student 6, female, urban)

This empathy created a sense of familiarity and security in the community and reduced psychological barriers to continuing to belong to the community in the future.

## 1.2 Grasping the demands of CH

Students saw that patients and their families appreciated healthcare professionals and directly experienced the community residents' expectations of the students. These experiences satisfied the needs of being evaluated by others, and evoked the willingness to commit to this demand in their future CH practice.

Every individual I saw expressed gratitude to the doctor...It was a good experience. I'm not sure if this will be my life's work, but I thought it would be nice to commit to this kind of work for a certain period. (Student 14, female, urban)

The residents were kind. I was impressed when they said to me, 'Please come

1  
2  
3  
4  
5  
6  
7  
8  
9  
10  
11  
12  
13  
14  
15  
16  
17  
18  
19  
20  
21  
22  
23  
24  
25  
26  
27  
28  
29  
30  
31  
32  
33  
34  
35  
36  
37  
38  
39  
40  
41  
42  
43  
44  
45  
46  
47  
48  
49  
50  
51  
52  
53  
54  
55  
56  
57  
58  
59  
60

back.’ This experience made me feel that doctors like us are in demand.

(Student 13, male, rural)

Conversely, community residents’ excessive expectations for students led to students’ fears that they may not be able to fulfill them. This caused anxiety about future CH practices.

Of course, I would be glad...if I could actually save people’s lives in the future. That being said, the pressure is too much, I wouldn’t be able to do everything perfectly. Therefore... I feel it would be challenging. (Student 7, female, urban)

### 1.3 Understanding the practices of CH

Students understood CH practices such as holistic medical care, comprehensive care, home care, preventive care, and a community-oriented approach, then imagined their future practice. This experience enabled students to replace uncertainty about their own future practices with practical knowledge. Furthermore, if students were interested in these practices, the desire to practice these activities was stimulated.

It goes without saying that I want to do this job. These experiences are really

1  
2  
3  
4  
5  
6 helpful in that I can now imagine how I would be working in the future. They  
7  
8  
9 were very effective opportunities because I could think about what I need to  
10  
11  
12 know. (Student 12, male, urban)  
13  
14  
15  
16

#### 17 1.4 Finding a role model

18  
19  
20 If the students' role models' practices were deemed achievable for students in the future,  
21  
22  
23 their desire to emulate the role model was stimulated. This experience contributed to the  
24  
25  
26 formation of future self-images engaging in CH.  
27  
28  
29

30 The doctor was really...the best... He can be an ideal role model. I'm grateful  
31  
32  
33 I had many opportunities to see the doctor thereafter. I listened to many of his  
34  
35  
36 stories. (Student 5, male, rural)  
37  
38  
39

40 However, this was obstructed if the students thought the role models' abilities  
41  
42  
43 were beyond their own capacities. Their anxiety about carrying out unfeasible practices  
44  
45  
46 in the future was stimulated.  
47  
48  
49

50 I really admire them. I think they're great. On the other hand, I'm not  
51  
52  
53 confident I can be like them... There are a lot of genuinely smart doctors and  
54  
55  
56 those who are passionate about CH. If I was asked if I have such a strong  
57  
58  
59  
60

1  
2  
3  
4  
5  
6 passion, I don't have that much passion, so I'm worried if I can actually  
7  
8  
9 become a doctor like them. (Student 7, female, urban)  
10  
11  
12  
13

#### 14 1.5 Diminishing the conflicts between personal life and career

15  
16

17 Students felt a potential conflict between their imagined future private lives, including  
18 marriage and childcare, and their career ideals (e.g., attaining specialist certifications).  
19  
20  
21

22 Diminishing this conflict secured the autonomy of their future daily lives and career  
23 choices.  
24  
25  
26  
27

28  
29  
30 I felt that life events like marriage and having a child will inevitably weaken  
31 motivation. That's why, having listened to Dr. A., I'm glad her talk helped  
32 me figure out how I can overcome such challenges. (Student 4, female, urban)  
33  
34  
35

36 Specialist physician...I have been worried constantly because I don't know  
37 what to do if I became interested in obtaining certification. I mean, I thought  
38 I would be far behind if I continued as a *chiikiwaku* physician. However, I've  
39 heard *chiikiwaku* physicians have been able to obtain specialist  
40 certification.... I appreciate this because I no longer have to be worried.  
41  
42  
43  
44  
45  
46  
47  
48  
49  
50  
51  
52

53  
54 (Student 4, female, urban)  
55  
56  
57  
58  
59  
60

## 2. Belonging to a supportive community

Robust construction of students' CH community and harmonization with community residents brought about a sense of belonging to a supportive community for *chiikiwaku* students.

### 2.1 Robust construction of students' CH community

The sense of belonging to the medical student community interested in CH was increased by constructing a robust community relationship.

Listening to different views and expectations of CH helps increase motivation.

This is because through such experiences, I can feel first-hand that I am part of a group of people who take CH seriously. (Student 12, male, urban)

On the other hand, critics of CH can decrease students' motivation. However, if the students' CH community functioned in a robust manner and students recognized their own sense of community belonging, then these conflicts might conversely strengthen their sense of belonging.

From time to time, I came across a doctor who unshakably believes in specialists. I didn't enjoy listening to such a doctor ... I would have a myopic

1  
2  
3  
4  
5  
6 view if I constantly listened to people who keep on saying that community  
7  
8  
9 physicians are better. I would rather like to say I have seen that side and I dare  
10  
11  
12 to have chosen this side. At that time, I felt uncomfortable. Though, in  
13  
14  
15 hindsight, that experience helped me choose the right path. (Student 1, female,  
16  
17  
18 urban)  
19

20  
21  
22  
23 Furthermore, the community support system made students feel secure. In this  
24  
25 regard, students' affinity with the community of medical doctors had an interesting role.  
26  
27 For some *chiikiwaku* students, their relationships with the local government's  
28  
29 administrative department that has the authority to decide their future working location  
30  
31 was perceived as an employee–employer relationship. However, when students realized  
32  
33 there were doctors in the administrative department and that these doctors were involved  
34  
35 in supporting their careers, the feeling of an employee–employer relationship was eased,  
36  
37  
38 and their feeling of autonomy regarding career choice was secured.  
39  
40  
41  
42  
43  
44  
45  
46  
47

48 As the government always tells us where to go, I've been feeling that I'm  
49  
50 made to work for them. As I didn't know that certain doctors are working as  
51  
52 government officers, I was thinking that those who don't know much about  
53  
54 what doctors do are unilaterally deciding what we should do. It was valuable  
55  
56  
57  
58  
59  
60

1  
2  
3  
4  
5  
6 to learn that the government includes those who understand doctors' work  
7  
8  
9 and that such people care about our careers and are trying to develop a system  
10  
11  
12 in which we can have equal opportunities. (Student 1, female, urban)  
13  
14  
15  
16

## 17 2.2 Harmonization with community residents 18

19  
20 As newcomers, students felt anxious about creating relationships with the community  
21  
22 residents. However, as students recognized that they were accepted into the community,  
23  
24 the sense of belonging to the community of residents was engendered. Furthermore,  
25  
26 community residents' dedication to CH and medical education evoked students' desires  
27  
28 to contribute to the community.  
29  
30  
31  
32  
33  
34  
35

36 As I was very welcomed there, I would like to give back to them by working  
37  
38 hard. ... When they said, 'Is there anything to learn from us?' and 'I would be  
39  
40 more than happy to help you if it would be beneficial,' I felt that I was given  
41  
42 such valuable opportunities to learn. (Student 10, female, urban)  
43  
44  
45  
46  
47  
48  
49

## 50 3. Heuristics and biases 51

52 Heuristics and biases, namely the affect heuristic and framing effect, stimulated students'  
53  
54 motivation to contribute to CH, by improving their conceptual image of CH.  
55  
56  
57  
58  
59  
60



### 3.1 Affect heuristic

This is an heuristic in which positive or negative emotions affect the judgment of things quickly and automatically.<sup>41</sup> CBME elements such as unique experiences in the community, interaction with others, enjoyable and relaxed practice environments, acquisition of fresh knowledge and skills, and finding a role model induced enjoyable, happy, and positive feelings in students. These positive feelings elicited the affect heuristic, impacting their conceptual image of CH.

For clinical clerkship in university, for example, I have to take training seriously, but the summer program was rather fun, a more harmonious training and hence was quite interesting. (Student 5, male, rural)

### 3.2 Framing effect

This is a cognitive bias in which a positive or negative presentation of something creates a decision-making bias.<sup>42</sup> Showing that CH professionals had an enjoyable work life and lifestyle, and describing how rewarding CH can be to students created a framing effect that CH was worthwhile. This affected students' conceptual image of CH.

All doctors look happy there. Every time I go there, I'm reminded they all enjoy working there. Every doctor is thriving there. (Student 4, female, urban)

## DISCUSSION

We explored what kind of experiences influence *chiikiwaku* students' motivation for practicing CH and the mechanism of this influence. Three mechanisms and corresponding experiences emerged: (1) envisioning and preparing for practicing CH (namely empathy for the community, grasping the demands for CH, understanding the practices of CH, finding a role model, and diminishing the conflicts between personal life and career), (2) belonging to a supportive community (namely robust construction of students' CH community and harmonization with community residents), and (3) heuristics and biases (namely the affect heuristic and framing effect). The corresponding experiences brought about the changes and influences on the students described in the presented mechanisms, and motivated them to practice CH.

To more deeply interpret the process of how these experiences motivate students, a theoretical framework was used, looking at internal motives such as student needs, cognitions, and emotions, and subordinate guiding theories that explain them in detail. We will now go through the various experiences and mechanisms and discuss their connections to the theoretical framework.

The first mechanism, envisioning and preparing for practicing CH, strengthens the expectation of success and subjective task value through self-images of future CH

1  
2  
3  
4  
5  
6 practice (cognitive motives). In addition, each experience that led to envisioning and  
7  
8  
9 preparing for practicing CH also included other motivating factors for students. Empathy  
10  
11  
12 for the community brings positive emotions such as optimism, calmness, and relaxation  
13  
14  
15 from familiarity and security (emotional motives). Furthermore, deeper knowledge of the  
16  
17  
18 region can increase expectation of success in living and practicing CH in the region  
19  
20  
21 (cognitive motives). With regard to grasping the demands for CH, students can recognize  
22  
23  
24 the importance of CH from the gratitude shown to healthcare professionals and the  
25  
26  
27 expectations of the students expressed by community residents and patients. This  
28  
29  
30 experience makes students recognize the task value of CH (cognitive motives).  
31  
32  
33 Furthermore, the regulation types proposed by SDT (see Methods) can also be used to  
34  
35  
36 interpret these experiences. This is an example of introjected regulation if their practice  
37  
38  
39 of CH is praised by others, and identified regulation which refers to the recognition that  
40  
41  
42 CH is important. Through these regulations, students' need for competence can be  
43  
44  
45 stimulated (needs motives). On the other hand, excessive expectations cause negative  
46  
47  
48 emotions for students (i.e., anxiety), who fear that they may not meet the expectations of  
49  
50  
51 residents and patients, and reduce their expectation of success (emotional and cognitive  
52  
53  
54 motives). With regard to finding a role model, if a student's expectation that they can  
55  
56  
57 become like their role model increases, their need for competence is stimulated; by  
58  
59  
60

1  
2  
3  
4  
5  
6 contrast, if the expectation of success decreases, the need for competence is stifled  
7  
8  
9 (cognitive and need motives). Additionally, finding a role model evokes a positive  
10  
11  
12 emotion arising from the desire to be like the role model: enthusiasm. This positive  
13  
14  
15 emotion could bring more internalized regulation, specifically integrated regulation,  
16  
17  
18 which integrates the identification of the value of CH and students' self-beliefs, or  
19  
20  
21 intrinsic regulation related to students' strong interests (emotional and needs motives).  
22  
23  
24 With regard to diminishing the conflicts between personal life and career, knowing how  
25  
26  
27 physicians practicing CH deal with these conflicts can increase the expectation of success  
28  
29  
30 (cognitive motives). This would secure their need for autonomy in their daily lives and  
31  
32  
33 career choices (needs motives). Moreover, confirmation of autonomy brings about a shift  
34  
35  
36 from negative (worry) to positive emotions (calmness; emotional motives).  
37  
38

39  
40 With reference to the second mechanism, belonging to a supportive community  
41  
42 satisfies students' relatedness needs (needs motives). In addition, regarding the robust  
43  
44  
45 construction of students' CH community, the fact that doctors working in the local  
46  
47  
48 government actively support students and reduce the sense of an employee-employer  
49  
50  
51 relationship brings positive emotions (calmness) for students, and secures their autonomy  
52  
53  
54 needs regarding their career choice (emotional and needs motives). With regard to  
55  
56  
57 harmonization with community residents, the active involvement of residents in student  
58  
59  
60

1  
2  
3  
4  
5  
6 education arouses the students' needs for competence, stimulating their desire to  
7  
8  
9 contribute to the community. This could also stimulate integrated regulation, which goes  
10  
11  
12 beyond simple praise or recognition of importance (needs motives).  
13  
14

15  
16 Regarding the third main theme, the affect heuristic and framing effects induce  
17  
18 improvements in the students' image of CH. Positive emotions (enthusiasm, cheerfulness,  
19  
20 optimism, contentedness, calmness, and relaxation) are greatly involved in this  
21  
22 (emotional motives). These positive emotions also promote intrinsic regulation, related  
23  
24 to students' strong interests (needs motives).  
25  
26  
27  
28  
29

30  
31 In previous studies, broad practice scope,<sup>43-46</sup> general practice,<sup>47</sup> specialty,<sup>43 45</sup>  
32  
33 clinical skill,<sup>47</sup> role models,<sup>44 45 48 49</sup> work satisfaction,<sup>43 50</sup> lifestyle,<sup>44 45 47 51</sup> exposure to  
34  
35 different places,<sup>50</sup> rural rotation,<sup>50</sup> patient interaction,<sup>47</sup> and social network<sup>48</sup> have been  
36  
37 listed as factors that increase the medical students' primary care and/or rural healthcare  
38  
39 motivations. Our study's findings are consistent with these previous findings. For  
40  
41 example, broad practice scope, general practice, specialty, clinical skill and work  
42  
43 satisfaction would be included in understanding the practices of CH; lifestyle would be  
44  
45 included in diminishing the conflicts between personal life and career; exposure to  
46  
47 different places, rural rotation, and patient interaction would be included in empathy for  
48  
49 the community, grasping the demands for CH, and harmonization with community  
50  
51  
52  
53  
54  
55  
56  
57  
58  
59  
60

1  
2  
3  
4  
5  
6 residents; and finally social network would be included in robust construction of students'  
7  
8  
9 CH community and harmonization with community residents. However, the novel  
10  
11  
12 significance of our study is that it includes detailed descriptions of how these factors  
13  
14  
15 (experiences) affected students' motivation and interprets the results through the lenses  
16  
17  
18 of multi-faceted motivation theories. In addition, importantly, the influence of heuristics  
19  
20  
21 and biases on students' motivation was suggested.  
22  
23  
24  
25

### 26 **Lessons for CBME programming**

27  
28  
29 How should our results be used when designing and reconstructing CBME programs so  
30  
31  
32 as to effectively foster students' motivation to become involved in CH? We suggest five  
33  
34  
35 possible approaches.  
36  
37

38 First, there should be many opportunities to interact with community residents as  
39  
40  
41 well as patients. By interacting with them, students can learn more about the community  
42  
43  
44 and the region, understand appreciation for and expectations of healthcare professionals  
45  
46  
47 and students, construct relationships with the community of residents, and have enjoyable  
48  
49  
50 experiences that they cannot otherwise gain by working in hospitals.  
51  
52

53 Second, patients and community residents should be asked to share their  
54  
55  
56 appreciation for healthcare professionals and health-related concerns with students.  
57  
58  
59  
60

1  
2  
3  
4  
5  
6 Communicating gratitude and expectations to others is sometimes embarrassing.  
7  
8

9 However, this is important for helping students easily grasp the demands of CH.  
10  
11

12 Third, healthcare professionals should provide positive messages to students  
13 about why they continue their work, how they feel rewarded, what they enjoy in work  
14 and life, and how to deal with conflicts between their private lives and careers. These  
15 make it easier for students to perceive healthcare professionals as role models, and  
16 facilitate the student's vision of their future CH practice. Furthermore, the framing effect  
17 improves the student's conceptual image of CH.  
18  
19  
20  
21  
22  
23  
24  
25  
26  
27  
28  
29

30 Fourth, there should be time for students to interact with each other and have an  
31 enjoyable leisure time. This would construct robust student relationships and generate  
32 pleasant memories, which would improve the students' conceptual image of CH through  
33 affect heuristics.  
34  
35  
36  
37  
38  
39  
40  
41

42 Fifth, there should be time to become familiar with the community environments  
43 and cultures. If these become enjoyable experiences for students, students would become  
44 attached to the community and region, have increased empathy for them, and their  
45 conceptual image of CH would again be improved through affect heuristics.  
46  
47  
48  
49  
50  
51  
52  
53

54 Incorporation of these items into CBME programs may encourage students to  
55 maintain and improve their motivation for practicing CH.  
56  
57  
58  
59  
60

## Limitations

There were three limitations in our study. First, this study focused on what kind of experiences influence *chiikiwaku* students' motivation for practicing CH, and the mechanism of this influence, and was not intended to provide reasons to motivate other students to participate in the *chiikiwaku* system or engage in CH. In order to increase the number of physicians engaged in CH, it is necessary to motivate not only *chiikiwaku* students but all other students as well. Further research targeting general students who have no CH obligations are needed.

Second, study participants were limited to *chiikiwaku* students from a single university. There are many variations in the *chiikiwaku* system, including selection methods, scholarship options, and working style after graduation, among others. *Chiikiwaku* doctors who graduate from Kobe University may work at small medical institutions in rural areas, but some *chiikiwaku* doctors who attended other universities may work after graduation at tertiary care medical institutions in the prefectures where their own universities were located. Thus, it is unclear whether all obligated students will be motivated to participate in CH through similar mechanisms. In this regard, further research targeting *chiikiwaku* students who belong to other universities is also needed.

Third, this study was conducted with students by their teachers. Thus, their



1  
2  
3  
4  
5  
6 hierarchical relationship could be a problem.<sup>34</sup> To address this problem, we made various  
7  
8  
9 efforts as described in the Methods, however we cannot completely eliminate the social  
10  
11  
12 desirability bias.<sup>35</sup>  
13  
14  
15  
16  
17  
18  
19

## 20 **CONCLUSIONS**

21  
22  
23 The *chiikiwaku* students developed a motivation to be involved in CH through self-images  
24  
25 of their future CH practice and life (i.e., envisioning and preparing for practicing CH);  
26  
27 constructing a robust student CH community and harmonizing with community residents  
28  
29 (i.e., belonging to a supportive community); and experiences generating positive  
30  
31 emotions that improve their conceptual image of CH (heuristics and biases). Many of  
32  
33 these mechanisms are generated by positive interaction with community residents,  
34  
35 healthcare professionals, and other students, and in exposure to attractive community  
36  
37 environments and cultures. Thus, these experiences should be incorporated into CBME  
38  
39 programs to further encourage students' positive attitudes toward CH.  
40  
41  
42  
43  
44  
45  
46  
47  
48  
49  
50  
51

## 52 **ACKNOWLEDGEMENTS**

53  
54 The authors wish to thank Editage ([www.editage.com](http://www.editage.com)) for English language editing.  
55  
56  
57  
58  
59  
60

## COMPETING INTERESTS

The authors report no conflicts of interest. The authors alone are responsible for the content and writing of the article.

## FUNDING

This study was supported by Grants-in-Aid for Scientific Research from the Japan Society for the Promotion of Science (JSPS KAKENHI Grant Number JP16K08870).

## ETHICAL APPROVAL

The Institutional Review Board of Kobe University Graduate School of Medicine approved this study on July 17, 2018 (number 180087).

## CONTRIBUTORS

YS was chiefly responsible for the study design, acquisition, analysis, and interpretation of the data and drafting of the manuscript. OM contributed to the study design, analysis, and interpretation of the data, and a critical revision of the manuscript. TT and KT contributed to the study design and the critical revision of the manuscript. All of the authors approved the final version of the manuscript.

## DATA AVAILABILITY STATEMENT

The data used and/or analyzed during the current study are available from the

1  
2  
3  
4  
5  
6  
7  
8  
9  
10  
11  
12  
13  
14  
15  
16  
17  
18  
19  
20  
21  
22  
23  
24  
25  
26  
27  
28  
29  
30  
31  
32  
33  
34  
35  
36  
37  
38  
39  
40  
41  
42  
43  
44  
45  
46  
47  
48  
49  
50  
51  
52  
53  
54  
55  
56  
57  
58  
59  
60

corresponding author on reasonable request.

## REFERENCES

1. Marengoni A, Angleman S, Melis R, et al. Aging with multimorbidity: a systematic review of the literature. *Ageing Res Rev* 2011;10(4):430-9. doi: 10.1016/j.arr.2011.03.003 [published Online First: 16 March 2011]
2. Tsutsui T. Implementation process and challenges for the community-based integrated care system in Japan. *Int J Integr Care* 2014;14:e002. doi: 10.5334/ijic.988 [published Online First: 31 January 2014]
3. World Health Organization Centre for Health Development (Kobe, Japan). *A glossary of terms for community health care and services for older persons. Kobe, Japan: World Health Organization Centre for Health Development. 2004.* <https://apps.who.int/iris/handle/10665/68896> (accessed 3 April 2020).
4. Kainuma M, Kikukawa M, Nagata M, et al. Competencies necessary for becoming a leader in the field of community medicine: a Japanese qualitative interview study. *BMJ Open* 2018;8(4):e020082. doi: 10.1136/bmjopen-2017-020082 [published Online First: 19 April 2018]
5. World Health Organization. (ed.) *Increasing Access to Health Workers in Remote and*

1  
2  
3  
4  
5  
6  
7 *Rural Areas Through Improved Retention: Global Policy Recommendations.*

8  
9 Geneva, Switzerland: WHO Press, 2010.

10  
11  
12 6. Matsumoto M, Inoue K, Takeuchi K. Quality of care in Japan: an additional strategy.

13  
14  
15 *Lancet* 2011;378(9807):e17. doi: 10.1016/S0140-6736(11)61841-2 [published

16  
17  
18 Online First: 6 December 2011]

19  
20  
21 7. Kataoka Y, Takayashiki A, Sato M, et al. Japanese regional-quota medical students in

22  
23  
24 their final year are less motivated to work in medically underserved areas than

25  
26  
27 they were in their first year: a prospective observational study. *Rural Remote*

28  
29  
30 *Health* 2018;18(4):4840. doi: 10.22605/RRH4840 [published Online First: 27

31  
32  
33 October 2018]

34  
35  
36 8. Matsumoto M, Takeuchi K, Owaki T, et al. Results of physician licence examination

37  
38  
39 and scholarship contract compliance by the graduates of regional quotas in

40  
41  
42 Japanese medical schools: a nationwide cross-sectional survey. *BMJ Open*

43  
44  
45 2017;7(12):e019418. doi: 10.1136/bmjopen-2017-019418 [published Online

46  
47  
48 First: 25 December 2017]

49  
50  
51 9. Hearst N, Shore WB, Hudes ES, et al. Family practice bashing as perceived by students

52  
53  
54 at a university medical center. *Fam Med* 1995;27(6):366-70. [published Online

55  
56  
57 First: 1 June 1995]

- 1  
2  
3  
4  
5  
6  
7  
8  
9  
10  
11  
12  
13  
14  
15  
16  
17  
18  
19  
20  
21  
22  
23  
24  
25  
26  
27  
28  
29  
30  
31  
32  
33  
34  
35  
36  
37  
38  
39  
40  
41  
42  
43  
44  
45  
46  
47  
48  
49  
50  
51  
52  
53  
54  
55  
56  
57  
58  
59  
60
10. Bowman MA, Haynes RA, Rivo ML, et al. Characteristics of medical students by level of interest in family practice. *Fam Med* 1996;28(10):713-9. [published Online First: 1 November 1996]
  11. Barrett FA, Lipsky MS, Lutfiyya MN. The impact of rural training experiences on medical students: a critical review. *Acad Med* 2011;86(2):259-63. doi: 10.1097/ACM.0b013e3182046387 [published Online First: 21 December 2010]
  12. Kelly L. (ed.) *Community-based medical education: a teacher's handbook*. Radcliffe Publishing: London, England, 2012.
  13. Crampton PES, McLachlan JC, Illing JC. A systematic literature review of undergraduate clinical placements in underserved areas. *Med Educ* 2013;47(10):969-78. doi: 10.1111/medu.12215 [published Online First: 11 September 2013]
  14. Lee SW, Clement N, Tang N, et al. The current provision of community-based teaching in UK medical schools: an online survey and systematic review. *BMJ Open* 2014;4(12):e005696. doi: 10.1136/bmjopen-2014-005696 [published Online First: 3 December 2014]
  15. Laven G, Wilkinson D. Rural doctors and rural backgrounds: how strong is the evidence? A systematic review. *Aust J Rural Health* 2003;11(6):277-84. doi:

- 1  
2  
3  
4  
5  
6  
7 10.1111/j.1440-1584.2003.00534.x [published Online First: 18 December 2003]  
8  
9  
10 16. Okayama M, Kajii E. Does community-based education increase students' motivation  
11  
12 to practice community health care?--a cross sectional study. *BMC Med Educ*  
13  
14  
15 2011;11:19. doi: 10.1186/1472-6920-11-19  
16  
17  
18 17. Viscomi M, Larkins S, Gupta TS. Recruitment and retention of general practitioners  
19  
20 in rural Canada and Australia: a review of the literature. *Can J Rural Med*  
21  
22 2013;18(1):13-23. [published Online First: 25 December 2012]  
23  
24  
25  
26  
27 18. Pfarrwaller E, Sommer J, Chung C, et al. Impact of Interventions to Increase the  
28  
29 Proportion of Medical Students Choosing a Primary Care Career: A Systematic  
30  
31 Review. *J Gen Intern Med* 2015;30(9):1349-58. doi: 10.1007/s11606-015-3372-  
32  
33 9 [published Online First: 16 July 2015]  
34  
35  
36  
37  
38  
39 19. Strasser R, Worley P, Cristobal F, et al. Putting communities in the driver's seat: the  
40  
41 realities of community-engaged medical education. *Acad Med* 2015;90(11):1466-  
42  
43 70. doi: 10.1097/acm.0000000000000765 [published Online First: 29 May 2015]  
44  
45  
46  
47  
48 20. Budhathoki SS, Zwanikken PA, Pokharel PK, et al. Factors influencing medical  
49  
50 students' motivation to practise in rural areas in low-income and middle-income  
51  
52 countries: a systematic review. *BMJ Open* 2017;7(2):e013501. doi:  
53  
54 10.1136/bmjopen-2016-013501 [published Online First: 25 February 2017]  
55  
56  
57  
58  
59  
60

- 1  
2  
3  
4  
5  
6  
7 21. Johnson GE, Wright FC, Foster K. The impact of rural outreach programs on medical  
8  
9 students' future rural intentions and working locations: a systematic review. *BMC*  
10  
11  
12 *Med Educ* 2018;18(1):196. doi: 10.1186/s12909-018-1287-y [published Online  
13  
14  
15 First: 16 August 2018]
- 16  
17  
18 22. Crampton PES. *Medical student learning during longitudinal clinical placements in*  
19  
20  
21 *under-served, deprived, community areas: A qualitative study*. Doctoral theses.  
22  
23  
24 Durham University; 2015.
- 25  
26  
27 23. Dube TV, Schinke RJ, Strasser R, et al. Transition processes through a longitudinal  
28  
29  
30 integrated clerkship: a qualitative study of medical students' experiences. *Med*  
31  
32  
33 *Educ* 2015;49(10):1028-37. doi: 10.1111/medu.12797 [published Online First: 19  
34  
35  
36  
37 September 2015]
- 38  
39 24. O'Brien BC, Harris IB, Beckman TJ, et al. Standards for reporting qualitative  
40  
41  
42 research: a synthesis of recommendations. *Acad Med* 2014;89(9):1245-51. doi:  
43  
44  
45 10.1097/acm.0000000000000388 [published Online First: 1 July 2014]
- 46  
47  
48 25. Denzin NK, Lincoln YS. *The SAGE Handbook of Qualitative Research*. 5th ed.  
49  
50  
51  
52 Thousand Oaks, CA: SAGE Publications; 2017.
- 53  
54 26. Reeve J. *Understanding Motivation and Emotion*. 7th ed. Hoboken, NJ: John Wiley  
55  
56  
57 & Sons; 2018.
- 58  
59  
60

- 1  
2  
3  
4  
5  
6  
7  
8  
9  
10  
11  
12  
13  
14  
15  
16  
17  
18  
19  
20  
21  
22  
23  
24  
25  
26  
27  
28  
29  
30  
31  
32  
33  
34  
35  
36  
37  
38  
39  
40  
41  
42  
43  
44  
45  
46  
47  
48  
49  
50  
51  
52  
53  
54  
55  
56  
57  
58  
59  
60
27. Cook DA, Artino AR, Jr. Motivation to learn: an overview of contemporary theories. *Med Educ* 2016;50(10):997-1014. doi: 10.1111/medu.13074
28. Deci EL, Ryan RM. The "What" and "Why" of Goal Pursuits: Human Needs and the Self-Determination of Behavior. *Psychol Inq* 2000;11(4):227-68. doi: 10.1207/S15327965PLI1104\_01
29. Wigfield A, Eccles JS. Expectancy-Value Theory of Achievement Motivation. *Contemp Educ Psychol* 2000;25(1):68-81. doi: 10.1006/ceps.1999.1015 [published Online First: 6 January 2000]
30. Vandercammen L, Hofmans J, Theuns P. Relating specific emotions to intrinsic motivation: on the moderating role of positive and negative emotion differentiation. *PloS One* 2014;9(12):e115396-e96. doi: 10.1371/journal.pone.0115396
31. Ten Cate TJ, Kusurkar RA, Williams GC. How self-determination theory can assist our understanding of the teaching and learning processes in medical education. AMEE guide No. 59. *Med Teach* 2011;33(12):961-73. doi: 10.3109/0142159x.2011.595435 [published Online First: 10 January 2012]
32. Kusurkar RA, Croiset G, Mann KV, et al. Have motivation theories guided the development and reform of medical education curricula? A review of the literature.



- 1  
2  
3  
4  
5  
6  
7  
8  
9  
10  
11  
12  
13  
14  
15  
16  
17  
18  
19  
20  
21  
22  
23  
24  
25  
26  
27  
28  
29  
30  
31  
32  
33  
34  
35  
36  
37  
38  
39  
40  
41  
42  
43  
44  
45  
46  
47  
48  
49  
50  
51  
52  
53  
54  
55  
56  
57  
58  
59  
60
- Acad Med* 2012;87(6):735-43. doi: 10.1097/ACM.0b013e318253cc0e [published Online First: 27 April 2012]
33. Orsini C, Binnie VI, Wilson SL. Determinants and outcomes of motivation in health professions education: a systematic review based on self-determination theory. *J Educ Eval Health Prof* 2016;13:19-19. doi: 10.3352/jeehp.2016.13.19
34. Boet S, Sharma S, Goldman J, et al. Review article: medical education research: an overview of methods. *Can J Anaesth* 2012;59(2):159-70. doi: 10.1007/s12630-011-9635-y [published Online First: 5 January 2012]
35. Nederhof AJ. Methods of coping with social desirability bias: A review. *Eur J Soc Psychol* 1985;15(3):263-80. doi: 10.1002/ejsp.2420150303
36. Polit DF, Beck CT. *Nursing Research: Principles and Methods*. 7th ed. Philadelphia, PA: Lippincott Williams & Wilkins; 2004.
37. Luborsky MR, Rubinstein RL. Sampling in Qualitative Research: Rationale, Issues, and Methods. *Res Aging* 1995;17(1):89-113. doi: 10.1177/0164027595171005
38. Saunders B, Sim J, Kingstone T, et al. Saturation in qualitative research: exploring its conceptualization and operationalization. *Qual Quant* 2018;52(4):1893-907. doi: 10.1007/s11135-017-0574-8 [published Online First: 14 September 2017]
39. Otani T. "SCAT" A qualitative data analysis method by four-step coding: Easy

- 1  
2  
3  
4  
5  
6 startable and small scale data-applicable process of theorization. *Bulletin of the*  
7  
8  
9 *Graduate School of Education and Human Development (Educational Sciences),*  
10  
11  
12 *Nagoya University* 2007;54:27-44 (In Japanese with English abstract).  
13  
14
- 15 40. Akatsu H. *American Medical Education-Diary in Ivy League Medical School*. Tokyo,  
16  
17  
18 Japan: Nippon hyoron sha; 1996 (in Japanese).  
19  
20
- 21 41. Finucane ML, Alhakami A, Slovic P, et al. The affect heuristic in judgments of risks  
22  
23 and benefits. *J Behav Decis Mak* 2000;13(1):1-17. doi: 10.1002/(sici)1099-  
24  
25 0771(200001/03)13:1<1::Aid-bdm333>3.0.Co;2-s  
26  
27  
28  
29
- 30 42. Tversky A, Kahneman D. The framing of decisions and the psychology of choice.  
31  
32  
33 *Science* 1981;211(4481):453-58. doi: 10.1126/science.7455683  
34  
35
- 36 43. Dixon AS, Lam CL, Lam TP. Does a brief clerkship change Hong Kong medical  
37  
38 students' ideas about general practice? *Med Educ* 2000;34(5):339-47. [published  
39  
40 Online First: 12 April 2000]  
41  
42  
43  
44
- 45 44. Jordan J, Brown JB, Russell G. Choosing family medicine. What influences medical  
46  
47 students? *Can Fam Physician* 2003;49:1131-7. [published Online First: 7 October  
48  
49 2003]  
50  
51  
52  
53
- 54 45. Scott I, Wright B, Brenneis F, et al. Why would I choose a career in family medicine?:  
55  
56 Reflections of medical students at 3 universities. *Can Fam Physician*  
57  
58  
59  
60

- 2007;53(11):1956-7. [published Online First: 15 November 2007]
46. Ohta R, Ryu Y, Katsube T, et al. Students' perceptions of general medicine following community-based medical education in rural Japan. *J Gen Fam Med* 2019;20(6):236-43. doi: 10.1002/jgf2.274
47. Stagg P, Greenhill J, Worley PS. A new model to understand the career choice and practice location decisions of medical graduates. *Rural Remote Health* 2009;9(4):1245. [published Online First: 1 December 2009]
48. Roberts C, Daly M, Kumar K, et al. A longitudinal integrated placement and medical students' intentions to practise rurally. *Med Educ* 2012;46(2):179-91. doi: 10.1111/j.1365-2923.2011.04102.x [published Online First: 14 January 2012]
49. Kawamoto R, Uemoto A, Ninomiya D, et al. Characteristics of Japanese medical students associated with their intention for rural practice. *Rural Remote Health* 2015;15(2):3112. [published Online First: 13 June 2015]
50. Codsí MP, Rodrigue R, Authier M, et al. Family medicine rotations and medical students' intention to pursue family medicine: Descriptive study. *Can Fam Physician* 2019;65(7):e316-e20. [published Online First: 14 July 2019] 51. Birden HH, Wilson I. Rural placements are effective for teaching medicine in Australia: evaluation of a cohort of students studying in rural placements. *Rural Remote*

1  
2  
3  
4  
5  
6  
7 *Health* 2012;12:2167. [published Online First: 2012/11/20]  
8  
9

- 10 51. Birden HH, Wilson I. Rural placements are effective for teaching medicine in  
11  
12 Australia: evaluation of a cohort of students studying in rural placements. *Rural*

13  
14  
15  
16 *Remote Health* 2012;12:2167. [published Online First: 20 November 2012]  
17  
18  
19  
20  
21  
22  
23  
24  
25  
26  
27  
28  
29  
30  
31  
32  
33  
34  
35  
36  
37  
38  
39  
40  
41  
42  
43  
44  
45  
46  
47  
48  
49  
50  
51  
52  
53  
54  
55  
56  
57  
58  
59  
60

For peer review only

1  
2 **Supplemental appendix. Interview guide used in the study.**

---

- 3 1. What do you think about community healthcare (CH)?  
4 2. Why do you think so?  
5 3. What were the events that affected your perception about CH?  
6 4. How did the events affect your perception about CH?  
7 5. How does the experience of home care affect your perception about CH?  
8 6. How does the experience of day care/service affect your perception about CH?  
9 7. How does the experience of health education for local residents affect your perception about CH?  
10 8. How does the experience in the rural area affect your perception about CH?  
11  
12
- 

13  
14  
15  
16  
17  
18  
19  
20  
21  
22  
23  
24  
25  
26  
27  
28  
29  
30  
31  
32  
33  
34  
35  
36  
37  
38  
39  
40  
41  
42  
43  
44  
45  
46  
47  
48  
49  
50  
51  
52  
53  
54  
55  
56  
57  
58  
59  
60

For peer review only

# Reporting checklist for qualitative study.

Based on the SRQR guidelines.

## Instructions to authors

Complete this checklist by entering the page numbers from your manuscript where readers will find each of the items listed below.

Your article may not currently address all the items on the checklist. Please modify your text to include the missing information. If you are certain that an item does not apply, please write "n/a" and provide a short explanation.

Upload your completed checklist as an extra file when you submit to a journal.

In your methods section, say that you used the SRQR reporting guidelines, and cite them as:

O'Brien BC, Harris IB, Beckman TJ, Reed DA, Cook DA. Standards for reporting qualitative research: a synthesis of recommendations. Acad Med. 2014;89(9):1245-1251.

|              |                                                                                                                                                                                                                                                                | Page   |
|--------------|----------------------------------------------------------------------------------------------------------------------------------------------------------------------------------------------------------------------------------------------------------------|--------|
|              | Reporting Item                                                                                                                                                                                                                                                 | Number |
| <b>Title</b> | <p><a href="#">#1</a> Concise description of the nature and topic of the study identifying the study as qualitative or indicating the approach (e.g. ethnography, grounded theory) or data collection methods (e.g. interview, focus group) is recommended</p> | 1      |

## Abstract

[#2](#) Summary of the key elements of the study using the abstract format of the intended publication; typically includes background, purpose, methods, results and conclusions

2-3

## Introduction

Problem formulation [#3](#) Description and significance of the problem / phenomenon studied: review of relevant theory and empirical work; problem statement

4-6

Purpose or research question [#4](#) Purpose of the study and specific objectives or questions

6

## Methods

Qualitative approach and research paradigm [#5](#) Qualitative approach (e.g. ethnography, grounded theory, case study, phenomenology, narrative research) and guiding theory if appropriate; identifying the research paradigm (e.g. postpositivist, constructivist / interpretivist) is also recommended; rationale. The rationale should briefly discuss the justification for choosing that theory, approach, method or technique rather than other options available; the assumptions and limitations implicit in those choices and how those choices influence study conclusions and transferability.

6-9

As appropriate the rationale for several items might be discussed together.

|    |                           |                     |        |
|----|---------------------------|---------------------|--------|
| 1  |                           |                     |        |
| 2  |                           |                     |        |
| 3  |                           |                     |        |
| 4  |                           |                     |        |
| 5  |                           |                     |        |
| 6  | Researcher                | <a href="#">#6</a>  | 9-10   |
| 7  |                           |                     |        |
| 8  | characteristics and       |                     |        |
| 9  |                           |                     |        |
| 10 | reflexivity               |                     |        |
| 11 |                           |                     |        |
| 12 |                           |                     |        |
| 13 |                           |                     |        |
| 14 |                           |                     |        |
| 15 |                           |                     |        |
| 16 |                           |                     |        |
| 17 |                           |                     |        |
| 18 |                           |                     |        |
| 19 |                           |                     |        |
| 20 |                           |                     |        |
| 21 |                           |                     |        |
| 22 | Context                   | <a href="#">#7</a>  | 10-11  |
| 23 |                           |                     |        |
| 24 |                           |                     |        |
| 25 | Sampling strategy         | <a href="#">#8</a>  | 11-12  |
| 26 |                           |                     |        |
| 27 |                           |                     |        |
| 28 |                           |                     |        |
| 29 |                           |                     |        |
| 30 |                           |                     |        |
| 31 |                           |                     |        |
| 32 |                           |                     |        |
| 33 |                           |                     |        |
| 34 |                           |                     |        |
| 35 | Ethical issues pertaining | <a href="#">#9</a>  | 12, 34 |
| 36 |                           |                     |        |
| 37 | to human subjects         |                     |        |
| 38 |                           |                     |        |
| 39 |                           |                     |        |
| 40 |                           |                     |        |
| 41 |                           |                     |        |
| 42 |                           |                     |        |
| 43 |                           |                     |        |
| 44 |                           |                     |        |
| 45 | Data collection methods   | <a href="#">#10</a> | 12-13  |
| 46 |                           |                     |        |
| 47 |                           |                     |        |
| 48 |                           |                     |        |
| 49 |                           |                     |        |
| 50 |                           |                     |        |
| 51 |                           |                     |        |
| 52 |                           |                     |        |
| 53 |                           |                     |        |
| 54 |                           |                     |        |
| 55 |                           |                     |        |
| 56 |                           |                     |        |
| 57 |                           |                     |        |
| 58 |                           |                     |        |
| 59 |                           |                     |        |
| 60 |                           |                     |        |



|    |                         |                     |                                                          |       |
|----|-------------------------|---------------------|----------------------------------------------------------|-------|
| 1  | Data collection         | <a href="#">#11</a> | Description of instruments (e.g. interview guides,       | 12    |
| 2  |                         |                     | questionnaires) and devices (e.g. audio recorders)       |       |
| 3  | instruments and         |                     | used for data collection; if / how the instruments(s)    |       |
| 4  |                         |                     | changed over the course of the study                     |       |
| 5  | technologies            |                     |                                                          |       |
| 6  |                         |                     |                                                          |       |
| 7  |                         |                     |                                                          |       |
| 8  |                         |                     |                                                          |       |
| 9  |                         |                     |                                                          |       |
| 10 |                         |                     |                                                          |       |
| 11 | Units of study          | <a href="#">#12</a> | Number and relevant characteristics of participants,     | 12-13 |
| 12 |                         |                     | documents, or events included in the study; level of     |       |
| 13 |                         |                     | participation (could be reported in results)             |       |
| 14 |                         |                     |                                                          |       |
| 15 |                         |                     |                                                          |       |
| 16 |                         |                     |                                                          |       |
| 17 |                         |                     |                                                          |       |
| 18 |                         |                     |                                                          |       |
| 19 | Data processing         | <a href="#">#13</a> | Methods for processing data prior to and during          | 12    |
| 20 |                         |                     | analysis, including transcription, data entry, data      |       |
| 21 |                         |                     | management and security, verification of data integrity, |       |
| 22 |                         |                     | data coding, and anonymisation / deidentification of     |       |
| 23 |                         |                     | excerpts                                                 |       |
| 24 |                         |                     |                                                          |       |
| 25 |                         |                     |                                                          |       |
| 26 |                         |                     |                                                          |       |
| 27 |                         |                     |                                                          |       |
| 28 |                         |                     |                                                          |       |
| 29 |                         |                     |                                                          |       |
| 30 |                         |                     |                                                          |       |
| 31 | Data analysis           | <a href="#">#14</a> | Process by which inferences, themes, etc. were           | 13-15 |
| 32 |                         |                     | identified and developed, including the researchers      |       |
| 33 |                         |                     | involved in data analysis; usually references a specific |       |
| 34 |                         |                     | paradigm or approach; rationale                          |       |
| 35 |                         |                     |                                                          |       |
| 36 |                         |                     |                                                          |       |
| 37 |                         |                     |                                                          |       |
| 38 |                         |                     |                                                          |       |
| 39 |                         |                     |                                                          |       |
| 40 |                         |                     |                                                          |       |
| 41 | Techniques to enhance   | <a href="#">#15</a> | Techniques to enhance trustworthiness and credibility    | 15-16 |
| 42 |                         |                     | of data analysis (e.g. member checking, audit trail,     |       |
| 43 | trustworthiness         |                     | triangulation); rationale                                |       |
| 44 |                         |                     |                                                          |       |
| 45 |                         |                     |                                                          |       |
| 46 |                         |                     |                                                          |       |
| 47 |                         |                     |                                                          |       |
| 48 | <b>Results/findings</b> |                     |                                                          |       |
| 49 |                         |                     |                                                          |       |
| 50 |                         |                     |                                                          |       |
| 51 | Syntheses and           | <a href="#">#16</a> | Main findings (e.g. interpretations, inferences, and     | 16-17 |
| 52 |                         |                     | themes); might include development of a theory or        |       |
| 53 | interpretation          |                     | model, or integration with prior research or theory      |       |
| 54 |                         |                     |                                                          |       |
| 55 |                         |                     |                                                          |       |
| 56 |                         |                     |                                                          |       |
| 57 |                         |                     |                                                          |       |
| 58 |                         |                     |                                                          |       |
| 59 |                         |                     |                                                          |       |
| 60 |                         |                     |                                                          |       |

|    |                              |                     |                                                          |       |
|----|------------------------------|---------------------|----------------------------------------------------------|-------|
| 1  | Links to empirical data      | <a href="#">#17</a> | Evidence (e.g. quotes, field notes, text excerpts,       | 17-25 |
| 2  |                              |                     | photographs) to substantiate analytic findings           |       |
| 3  |                              |                     |                                                          |       |
| 4  |                              |                     |                                                          |       |
| 5  |                              |                     |                                                          |       |
| 6  | <b>Discussion</b>            |                     |                                                          |       |
| 7  |                              |                     |                                                          |       |
| 8  |                              |                     |                                                          |       |
| 9  |                              |                     |                                                          |       |
| 10 | Intergration with prior      | <a href="#">#18</a> | Short summary of main findings; explanation of how       | 26-31 |
| 11 | work, implications,          |                     | findings and conclusions connect to, support, elaborate  |       |
| 12 |                              |                     | on, or challenge conclusions of earlier scholarship;     |       |
| 13 | transferability and          |                     | discussion of scope of application / generalizability;   |       |
| 14 |                              |                     | identification of unique contributions(s) to scholarship |       |
| 15 | contribution(s) to the field |                     | in a discipline or field                                 |       |
| 16 |                              |                     |                                                          |       |
| 17 |                              |                     |                                                          |       |
| 18 |                              |                     |                                                          |       |
| 19 |                              |                     |                                                          |       |
| 20 |                              |                     |                                                          |       |
| 21 |                              |                     |                                                          |       |
| 22 |                              |                     |                                                          |       |
| 23 |                              |                     |                                                          |       |
| 24 | Limitations                  | <a href="#">#19</a> | Trustworthiness and limitations of findings              | 32-33 |
| 25 |                              |                     |                                                          |       |
| 26 |                              |                     |                                                          |       |
| 27 | <b>Other</b>                 |                     |                                                          |       |
| 28 |                              |                     |                                                          |       |
| 29 |                              |                     |                                                          |       |
| 30 | Conflicts of interest        | <a href="#">#20</a> | Potential sources of influence of perceived influence on | 34    |
| 31 |                              |                     | study conduct and conclusions; how these were            |       |
| 32 |                              |                     | managed                                                  |       |
| 33 |                              |                     |                                                          |       |
| 34 |                              |                     |                                                          |       |
| 35 |                              |                     |                                                          |       |
| 36 |                              |                     |                                                          |       |
| 37 |                              |                     |                                                          |       |
| 38 | Funding                      | <a href="#">#21</a> | Sources of funding and other support; role of funders in | 34    |
| 39 |                              |                     | data collection, interpretation and reporting            |       |
| 40 |                              |                     |                                                          |       |
| 41 |                              |                     |                                                          |       |
| 42 |                              |                     |                                                          |       |

43 The SRQR checklist is distributed with permission of Wolters Kluwer © 2014 by the Association of  
 44 American Medical Colleges. This checklist was completed on 11. April 2020 using  
 45 <https://www.goodreports.org/>, a tool made by the [EQUATOR Network](#) in collaboration with  
 46 [Penelope.ai](#)

# BMJ Open

## Fostering Student Motivation toward Community Healthcare: A Qualitative Study

|                                 |                                                                                                                                                                                                                                                                                                                                                                                                                                                                                                                                                                                                                                                                             |
|---------------------------------|-----------------------------------------------------------------------------------------------------------------------------------------------------------------------------------------------------------------------------------------------------------------------------------------------------------------------------------------------------------------------------------------------------------------------------------------------------------------------------------------------------------------------------------------------------------------------------------------------------------------------------------------------------------------------------|
| Journal:                        | <i>BMJ Open</i>                                                                                                                                                                                                                                                                                                                                                                                                                                                                                                                                                                                                                                                             |
| Manuscript ID                   | bmjopen-2020-039344.R2                                                                                                                                                                                                                                                                                                                                                                                                                                                                                                                                                                                                                                                      |
| Article Type:                   | Original research                                                                                                                                                                                                                                                                                                                                                                                                                                                                                                                                                                                                                                                           |
| Date Submitted by the Author:   | 18-Nov-2020                                                                                                                                                                                                                                                                                                                                                                                                                                                                                                                                                                                                                                                                 |
| Complete List of Authors:       | Yahata, Shinsuke; Kobe University Graduate School of Medicine School of Medicine, Division of Community Medicine and Medical Education Takeshima, Taro; Fukushima Medical University, Department of General Medicine, Shirakawa Satellite for Teaching and Research (STAR); Fukushima Medical University, Center for Innovative Research for Communities and Clinical Excellence (CIRC2LE) Kenzaka, Tsuneaki; Kobe University Graduate School of Medicine School of Medicine, Division of Community Medicine and Career Development Okayama, Masanobu; Kobe University Graduate School of Medicine School of Medicine, Division of Community Medicine and Medical Education |
| <b>Primary Subject Heading</b>: | Medical education and training                                                                                                                                                                                                                                                                                                                                                                                                                                                                                                                                                                                                                                              |
| Secondary Subject Heading:      | General practice / Family practice                                                                                                                                                                                                                                                                                                                                                                                                                                                                                                                                                                                                                                          |
| Keywords:                       | MEDICAL EDUCATION & TRAINING, PRIMARY CARE, QUALITATIVE RESEARCH                                                                                                                                                                                                                                                                                                                                                                                                                                                                                                                                                                                                            |
|                                 |                                                                                                                                                                                                                                                                                                                                                                                                                                                                                                                                                                                                                                                                             |

SCHOLARONE™  
Manuscripts



I, the Submitting Author has the right to grant and does grant on behalf of all authors of the Work (as defined in the below author licence), an exclusive licence and/or a non-exclusive licence for contributions from authors who are: i) UK Crown employees; ii) where BMJ has agreed a CC-BY licence shall apply, and/or iii) in accordance with the terms applicable for US Federal Government officers or employees acting as part of their official duties; on a worldwide, perpetual, irrevocable, royalty-free basis to BMJ Publishing Group Ltd ("BMJ") its licensees and where the relevant Journal is co-owned by BMJ to the co-owners of the Journal, to publish the Work in this journal and any other BMJ products and to exploit all rights, as set out in our [licence](#).

The Submitting Author accepts and understands that any supply made under these terms is made by BMJ to the Submitting Author unless you are acting as an employee on behalf of your employer or a postgraduate student of an affiliated institution which is paying any applicable article publishing charge ("APC") for Open Access articles. Where the Submitting Author wishes to make the Work available on an Open Access basis (and intends to pay the relevant APC), the terms of reuse of such Open Access shall be governed by a Creative Commons licence – details of these licences and which [Creative Commons](#) licence will apply to this Work are set out in our licence referred to above.

Other than as permitted in any relevant BMJ Author's Self Archiving Policies, I confirm this Work has not been accepted for publication elsewhere, is not being considered for publication elsewhere and does not duplicate material already published. I confirm all authors consent to publication of this Work and authorise the granting of this licence.

1  
2  
3  
4  
5  
6 **Fostering Student Motivation toward Community Healthcare: A**  
7  
8  
9 **Qualitative Study**  
10

11  
12 Words: 5243  
13

14  
15 Shinsuke Yahata<sup>1</sup>, Taro Takeshima<sup>2</sup>, Tsuneaki Kenzaka<sup>3</sup>, and Masanobu  
16  
17  
18 Okayama<sup>1</sup>  
19

20  
21  
22 *<sup>1</sup>Division of Community Medicine and Medical Education, Kobe University Graduate*  
23  
24  
25 *School of Medicine, Kobe, Japan.*  
26

27  
28  
29 *<sup>2</sup>Department of General Medicine, Shirakawa Satellite for Teaching and Research*  
30  
31  
32 *(STAR), Fukushima Medical University, Fukushima, Japan, and the Center for Innovative*  
33  
34  
35 *Research for Communities and Clinical Excellence (CIRC2LE), Fukushima Medical*  
36  
37  
38 *University, Fukushima, Japan.*  
39

40  
41  
42 *<sup>3</sup>Division of Community Medicine and Career Development, Kobe University Graduate*  
43  
44  
45 *School of Medicine, Kobe, Japan.*  
46

47  
48  
49 *Correspondence: Shinsuke Yahata, Division of Community Medicine and Medical*  
50  
51  
52 *Education, Kobe University Graduate School of Medicine, 2-1-5, Arata-cho, Hyogo-ku,*  
53  
54  
55 *Kobe, Hyogo, 652-0032, Japan; telephone: +81-78-382-6732; e-mail: yahata-*  
56  
57  
58 *jci@umin.ac.jp.*  
59  
60

1  
2  
3  
4  
5  
6  
7  
8  
9  
10  
11  
12  
13  
14  
15  
16  
17  
18  
19  
20  
21  
22  
23  
24  
25  
26  
27  
28  
29  
30  
31  
32  
33  
34  
35  
36  
37  
38  
39  
40  
41  
42  
43  
44  
45  
46  
47  
48  
49  
50  
51  
52  
53  
54  
55  
56  
57  
58  
59  
60

Keywords: community healthcare, community-based medical education, self-determination theory, expectancy-value theories, emotions

## ABSTRACT

**Objectives:** This study investigated what kinds of experiences influence regional quota (*chiikiwaku*) medical students' motivation to practice community healthcare (CH), and the mechanism of this influence, by focusing on their experiences in a community-based medical education (CBME) program.

**Design:** A qualitative thematic analysis based on interviews.

**Setting:** Participants were recruited from the *chiikiwaku* students of Kobe University, Japan, using purposive sampling.

**Participants:** Fourteen students participated. The median (inter-quartile range) age of participants was 23 (23-24); half were sixth-year and half fifth-year students.

**Analysis:** From September to December 2018, the interviews were audio-recorded and transcribed verbatim. Data were analyzed according to the "Steps for Coding and Theorization" method. Our theoretical framework comprised three internal motives (i.e., needs, cognitions, and emotions) and their subordinate motivation theories self-determination theory, expectancy-value theories, and positive and negative emotions, respectively.

1  
2  
3  
4  
5  
6 **Results:** Three mechanisms and corresponding experiences emerged. The first  
7  
8  
9 mechanism, envisioning and preparing for practicing CH, included corresponding  
10  
11  
12 experiences—empathy for the community, grasping the demands of CH, understanding  
13  
14  
15 the practices of CH, finding a role model, and diminishing the conflicts between personal  
16  
17  
18 life and career. The second mechanism, belonging to a supportive community, included  
19  
20  
21 the robust construction of students' CH community and harmonization with community  
22  
23  
24 residents. The third mechanism, psychological effects, included the affect heuristic and  
25  
26  
27 framing effect. Student experiences brought about the changes and influences described  
28  
29  
30 in the presented mechanisms, and had both positive and negative impacts on their  
31  
32  
33 motivation toward CH. These results can be interpreted through the multifaceted lenses  
34  
35  
36 of motivation theories.

37  
38  
39 **Conclusions:** The authors revealed that motivation mechanisms of medical students  
40  
41  
42 towards CH derived from positive interaction with community residents, healthcare  
43  
44  
45 professionals, and other students, and from exposure to attractive community  
46  
47  
48 environments and cultures. These experiences should be incorporated into CBME  
49  
50  
51 programs to further encourage positive attitudes toward CH.  
52  
53  
54  
55  
56  
57  
58  
59  
60

## Strengths and limitations of this study

- This study describes the motivation mechanisms of medical students toward practicing community healthcare.
- It is unclear whether all medical students will be motivated to participate in community healthcare through similar mechanisms since the study focuses on a specific group of participants.
- Social desirability bias occurring through the relationship between teachers and students cannot be completely eliminated.

## INTRODUCTION

Elderly patients with multimorbidity or irremediable diseases have been increasing in number as global populations age.<sup>1</sup> Thus, the healthcare paradigm has shifted from conventional medical care, which cures diseases at hospitals, to community-based integrated care, which supports patients in the community.<sup>2</sup> These social contexts demand nurturing healthcare professionals with insights into the concept of community healthcare (CH), defined as the integration of health services and social care in the community,<sup>3</sup> who can effectively manage integrated care systems.<sup>4</sup>

Furthermore, the uneven distribution of physician manpower is a serious global



1  
2  
3  
4  
5  
6  
7  
8  
9  
10  
11  
12  
13  
14  
15  
16  
17  
18  
19  
20  
21  
22  
23  
24  
25  
26  
27  
28  
29  
30  
31  
32  
33  
34  
35  
36  
37  
38  
39  
40  
41  
42  
43  
44  
45  
46  
47  
48  
49  
50  
51  
52  
53  
54  
55  
56  
57  
58  
59  
60

problem. The World Health Organization published global policy recommendations regarding access to health workers,<sup>5</sup> which several countries have adopted to confront this challenge. The Japanese government has implemented a regional quota system (*chiikiwaku*) to manage this problem.<sup>6</sup> *Chiikiwaku* allows medical students to receive prior benefits (e.g., special entrance qualifications and scholarships) on the condition they work for a specified medical institution (especially in rural areas) for a certain period after graduation, during which they are required to practice CH. In other words, they are required to become professionals who properly manage integrated care and compensate for the uneven distribution of doctors. However, it has been reported that the willingness of *chiikiwaku* students to remain in medically underserved areas declines from 52.3% to 19.2% during their studies.<sup>7</sup> Withdrawal from the *chiikiwaku* system, which was reported to be about 10%, is also a problem.<sup>8</sup> Moreover, the preference for a primary care career, which is necessary for practicing CH, may decrease during medical school.<sup>9 10</sup> Therefore, it is necessary to continuously encourage *chiikiwaku* students, while they are undergraduates, to maintain and improve their motivation for practicing CH.

Numerous studies have demonstrated that community-based medical education (CBME) programs, which have been implemented worldwide, improve CH skills<sup>11-14</sup> and increase motivation toward CH, primary care, and rural practice.<sup>11 13-21</sup> However,

1  
2  
3  
4  
5  
6 although the overall effectiveness of these programs has been evaluated, and some  
7  
8  
9 educational components have been described,<sup>22 23</sup> the knowledge of mechanisms that  
10  
11  
12 motivate students to participate in CH is insufficient. Elucidating these mechanisms can  
13  
14  
15 provide significant insights for designing and reconstructing CBME programs to nurture  
16  
17  
18 future CH physicians. As such, our research objective is to investigate what kind of  
19  
20  
21 experiences influenced chiikiwaku students motivation for practicing CH in CBME  
22  
23  
24 programs and the mechanisms of this influence.  
25  
26  
27  
28

## 29 **METHODS**

### 30 **Qualitative approach and research paradigm**

31  
32  
33 We conducted a qualitative thematic analysis using interview data. The  
34  
35  
36 Standards for Reporting Qualitative Research (SRQR)<sup>24</sup> were adopted for the presentation  
37  
38  
39 of our research. We chose the constructivism paradigm to interpret and understand the  
40  
41  
42 meanings of students' experiences.<sup>25</sup> The constructivism paradigm asserts that people  
43  
44  
45 construct their understanding and knowledge of the world through experience and  
46  
47  
48 reflection on those experiences.  
49  
50  
51

52  
53  
54 To interpret how students' experiences influenced their motivation for practicing  
55  
56  
57 CH, we used motivation theories as theoretical framework. There are numerous  
58  
59  
60

1  
2  
3  
4  
5  
6 motivation theories; however some confusion has arisen because of their conceptual  
7  
8  
9 overlaps and disagreements.<sup>26</sup> In other words, there is no one theory that can absolutely  
10  
11  
12 explain human motivations. We chose to use Reeve's concept of three internal motives.<sup>27</sup>  
13  
14  
15 Reeve defines "motivation" as "a condition inside us that desires a change" and proposes  
16  
17  
18 three internal motives for action: needs, cognitions, and emotions. We considered  
19  
20  
21 "student motivation toward CH" as "a condition inside students that they desire to practice  
22  
23  
24 CH" and adopted these three internal motives as a framework. In addition, in order to  
25  
26  
27 explain the three internal motives in detail, we used self-determination theory (SDT),<sup>28</sup>  
28  
29  
30 expectancy-value theories (EVT),<sup>29</sup> and positive and negative emotions<sup>30</sup> as subordinate  
31  
32  
33 guiding theories. We chose SDT and EVT because they are current, widely recognized  
34  
35  
36 theories.<sup>27 31-33</sup> Emotions have been characterized as feeling-arousal-purposive-  
37  
38  
39 expressive phenomena, whose components cooperate in a complicated manner and allow  
40  
41  
42 us to react adaptively to the important events in our lives.<sup>26</sup> For the purposes of our study,  
43  
44  
45 in order to express them more simply, we adopted six positive and six negative  
46  
47  
48 emotions.<sup>30</sup>  
49

50  
51 SDT, which is involved in needs, comprises three basic psychological needs:  
52  
53  
54 autonomy, competence, and relatedness.<sup>28</sup> The need for autonomy is a tendency to self-  
55  
56  
57 organize experiences and behaviors. The need for competence refers to a desire to affect  
58  
59  
60

1  
2  
3  
4  
5  
6 the environment and attain valued outcomes. Finally, the need for relatedness is a  
7  
8  
9 tendency to love and care for and be loved and cared for by others. SDT also classifies  
10  
11  
12 the regulation types related to motivation: external, introjected, identified, integrated, and  
13  
14  
15 intrinsic regulations.<sup>28</sup> External regulation refers to the act of being controlled by external  
16  
17  
18 contingencies such as rewards or punishments. Introjected regulation refers to avoiding  
19  
20  
21 guilt or raising self-esteem by internalizing external pressures. Identified regulation  
22  
23  
24 derives from the recognition and acceptance of the behavior's importance. Integrated  
25  
26  
27 regulation refers to the act of integrating external identifications into other aspects of the  
28  
29  
30 self. In intrinsic regulation, the act itself becomes the purpose with a strong motivation.  
31  
32  
33 This regulation type leads to the most autonomous motivation.

34  
35  
36 EVT, which is involved in cognitions, consists of two important independent  
37  
38  
39 factors that influence behavior: expectation of success and subjective task value. The  
40  
41  
42 expectation of success is the belief that one will succeed in one's tasks. The subjective  
43  
44  
45 task value comprises attainment value, utility value, and cost.<sup>29</sup>

46  
47  
48 Regarding emotions, we defined six positive emotions as enthusiasm,  
49  
50  
51 cheerfulness, optimism, contentedness, calmness, and relaxation, and negative emotions  
52  
53  
54 were tension, gloominess, depression, worry, miserableness, and uneasiness.<sup>30</sup> These  
55  
56  
57 frameworks were adopted to analyze the students' experiences and facilitate the  
58  
59  
60

1  
2  
3  
4  
5  
6 interpretation of what their effects were on motivation and the mechanisms by which they  
7  
8  
9 operated. Using multiple theories encourages a deeper understanding of motivational  
10  
11  
12 principles.<sup>27</sup>  
13  
14  
15  
16

## 17 **Researcher characteristics and reflexivity**

18  
19  
20 As undergraduates, all researchers in this study were obligated students who then worked  
21  
22  
23 at rural medical institutions for nine years post-graduation. Currently, they engage in  
24  
25  
26 community medicine education and research at the university while practicing at rural  
27  
28  
29 medical institutions.  
30  
31

32 Additionally, YS and OM taught the research participants. Their hierarchical  
33  
34  
35 relationship<sup>34</sup> could have resulted in the social desirability bias whereby students are  
36  
37  
38 motivated to respond in ways they think may be desirable to their teachers.<sup>35</sup> To address  
39  
40  
41 this problem, requesting student participation, collecting data, and writing the transcripts  
42  
43  
44 were done only by YS. Although YS is a faculty member, YS has not been involved in  
45  
46  
47 the judgment of academic achievement and promotion of participating students. The co-  
48  
49  
50 researcher (OM) has been involved in the judgment of students, so he joined the analysis  
51  
52  
53 after students' personal identity information was deleted. We communicated this to the  
54  
55  
56 students and made an effort to create an atmosphere where they could relax and respond  
57  
58  
59  
60

1  
2  
3  
4  
5  
6 freely. The other co-researchers (TT and KT) were not involved in the research processes  
7  
8  
9 described above.  
10  
11  
12  
13

## 14 **Research context**

### 15 Kobe University *Chiikiwaku*

16  
17 This research was conducted at Kobe University. Candidates who want to join Kobe  
18  
19  
20 University's *chiikiwaku* program must receive recommendations from graduate high  
21  
22  
23 schools and then take the specific entrance examination. They can only apply to the  
24  
25  
26 program before admission. After admission, they receive scholarships from the Hyogo  
27  
28  
29 prefectural government, which is responsible for securing medical care in Hyogo  
30  
31  
32 prefecture's rural areas. They have the obligation to work for nine years post-graduation  
33  
34  
35 at rural medical institutions assigned by the prefectural government. These systems are  
36  
37  
38 common throughout Japan, with some differences. *Chiikiwaku* students comprise about  
39  
40  
41 10% of all Kobe University medical students.  
42  
43  
44  
45  
46  
47  
48

### 49 Kobe University CBME

50  
51 All pre-clinical students, including *chiikiwaku* students, attend university CH lectures,  
52  
53  
54 programs at nursing care facilities, and special needs schools. During their clinical years,  
55  
56  
57 they are exposed to home care, and a community-based clerkship program for about two  
58  
59  
60

1  
2  
3  
4  
5  
6 weeks or one month is available. Additionally, certain special programs are provided  
7  
8  
9 mainly for *chiikiwaku* students: a two-day early exposure program in rural community  
10  
11  
12 clinics, a three-day summer program in rural medical institutions, and a health education  
13  
14  
15 program for the elderly in rural areas.  
16  
17

## 18 19 20 21 **Participants**

22  
23  
24 We used purposive sampling<sup>36</sup> in order to focus on the mechanisms through which  
25  
26  
27 *chiikiwaku* students maintained and improved their motivation for practicing CH. We  
28  
29  
30 recruited fifth- or sixth-year *chiikiwaku* students at Kobe University as research  
31  
32  
33 participants. We selected fifth- or sixth-year students (i.e., students in their clinical years)  
34  
35  
36 to effectively collect rich experiences related to CH. There were 19 *chiikiwaku* students  
37  
38  
39 who satisfied the selection criteria. We continued sampling until obtaining saturation, i.e.,  
40  
41  
42 no further themes or constructs could be identified in the analysis.<sup>37</sup>  
43  
44

45  
46 The first author (YS) emailed the first participant selected from the target groups  
47  
48 that satisfied the selection criteria; then, if this student expressed an interest in  
49  
50  
51 participating, they were informed of the details in person and gave their written informed  
52  
53  
54 consent. After collecting and analyzing their data, YS contacted the next participant in a  
55  
56  
57 similar manner.  
58  
59  
60

## Data collection

We chose individual, in-depth, semi-structured interviews that allowed us to delve deeply into interviewees' experiences in order to acquire rich descriptions.<sup>25</sup> Before the interviews, we prepared the interview guide, including eight questions based on the students' past practical CH-related experiences (see Supplemental Appendix). The guide was intended to be revised but it was not necessary because of sufficient data. YS interviewed all study participants from September to December 2018. Each interview lasted about 60 minutes and was audio-recorded and then transcribed by YS.

There were 19 fifth- or sixth-year *chiikiwaku* students (female = 10, male = 9) at Kobe University. Everyone who received the request kindly agreed to participate. Finally, a total of 14 students (73.7%; female = 9, male = 5) participated (i.e., saturation was reached after 14 students had been interviewed, at which point the interviews were concluded). Participants' median (inter-quartile range) age was 23 (23–24); half were fifth-year and the other half sixth-year students. Five participants subjectively recognized their hometown as rural and nine as urban.



## Data analysis

The transcripts were analyzed following the “Steps for Coding and Theorization” (SCAT) method, which is a grounded theory-inspired thematic analytical approach.<sup>38 39</sup> SCAT consists of a four-step coding process. In the following, we describe the analytical approach by using examples provided by Otani p. 36.<sup>38</sup> As a preliminary preparation, the text transcripts are segmented into fragmented data: *“The professor began to undress on the platform. Everyone was taken aback. Then, on his chest, an image of heart and blood vessels appeared. Everyone cheered and applauded.”* In step 1, important words from the segmented text are extracted: *“professor,” “image of heart and blood vessels appeared,”* and *“cheered and applauded.”* Step 2 consists of replacing the extracted word with operationalized words that represent the meaning extracts from step 1: *“authoritative teacher,” “overlaying reality with teaching materials,” “surprise teaching material presentation,”* and *“students’ surprise and pleasure.”* In step 3, words from step 1&2 are operationalized into codes representative for the context of the entire data: *“superimposition of real body and picture”* and *“element of surprise.”* Step 4 consists of creating themes and constructs; *“modeling reality,” “layer presentation of reality and teaching materials,”* and *“extracting motivation and expectations based on surprise.”* Lastly, a storyline defined as latent meaning based on the themes from step 4,

1  
2  
3  
4  
5  
6 are written: *“this professor turned his body into a type of teaching material in a surprising*  
7  
8  
9 *way and realized a learning process that included surprises.”* Finally, theories are  
10  
11  
12 generated based on the storyline: *“the use of one’s body in medical education can leave*  
13  
14  
15 *a strong impression on learners.”* Otani p. 159<sup>39</sup> emphasize that the theories generated  
16  
17  
18 are *“not something that is universal and generally accepted, but what can be said from*  
19  
20  
21 *this data.”*

22  
23  
24 The final themes were described by organizing the theories that emerged through  
25  
26  
27 analysis. Otani stated that the characteristics of SCAT were as follows. The process of  
28  
29  
30 going back and forth between steps (1) and (4) and reading them repeatedly improves the  
31  
32  
33 quality and depth of the analyst’s reflection, i.e. improves reflexivity. Furthermore, the  
34  
35  
36 explicit description of the analytic process allowed the readers to replicate the result and  
37  
38  
39 disprove any errors, i.e. improves falsifiability.<sup>38</sup> We chose this approach for its usability,  
40  
41  
42 process explicitness, and improved reflexivity and falsifiability. These analysis processes  
43  
44  
45 were all done in Excel 2013 (Microsoft Corporation, Redmond, WA, USA).

46  
47  
48 YS analyzed the data in each step, and a co-researcher (OM) reviewed the  
49  
50  
51 transcripts and analysis results.

## 52 53 54 55 **Patient or public involvement**

56  
57  
58 This research was conducted with partial participant involvement. Participants were not  
59  
60

1  
2  
3  
4  
5  
6 invited to comment on the study design and methods. However, they were emailed their  
7  
8  
9 own transcripts and analysis results, and invited to comment on them. Four commented  
10  
11  
12 via email or face-to-face, and confirmed that there were no issues in the readability and  
13  
14  
15 accuracy of the transcripts and the results obtained from them. This process strengthened  
16  
17  
18 the overall credibility of the study.<sup>36</sup>  
19  
20  
21  
22  
23

## 24 **RESULTS**

25  
26  
27 While exploring what kind of experiences influence *chiikiwaku* students' motivation for  
28  
29  
30 practicing CH and the mechanisms of this influence, three mechanisms emerged as the  
31  
32  
33 main themes: envisioning and preparing for practicing CH, belonging to a supportive  
34  
35  
36 community, and psychological effects. The corresponding experiences, which emerged  
37  
38  
39 as sub-themes, brought about the changes and influences described in the presented  
40  
41  
42 mechanisms and had both a positive and negative impact on students' motivation toward  
43  
44  
45 CH, depending on the level of fulfillment obtained through the experiences and whether  
46  
47  
48 students were able to accept them.  
49  
50  
51  
52

### 53 **1. Envisioning and preparing for practicing CH**

54  
55  
56 *Chiikiwaku* students envisioned and prepared for their future practice of CH through five  
57  
58  
59  
60

1  
2  
3  
4  
5  
6 experiences: “empathy for the community,” “grasping the demands for CH,”  
7  
8  
9 “understanding the practices of CH,” “finding a role model,” and “diminishing the  
10  
11  
12 conflicts between personal life and career.”  
13  
14  
15  
16

### 17 1.1 Empathy for the community

18  
19  
20 Students generated empathy by comparing their own thoughts, living environments, and  
21  
22  
23 cultural backgrounds with those of community residents and healthcare professionals  
24  
25  
26 through community dialogues and experiences.  
27  
28  
29

30 I’ve been to many different areas... When I talk to local people, I can see their  
31  
32  
33 lives are not different from those in other areas. I think it’s very important to  
34  
35  
36 listen to local people. (Student 5, rural)  
37  
38  
39

40 This empathy results from the recognition that there is little difference between them.  
41  
42  
43 Even if there were some differences, they still felt empathy.  
44  
45  
46

47 In certain areas I’ve visited, I heard I couldn’t survive without a car. As my  
48  
49  
50 parents don’t have a car, I could never imagine a life in which a car is  
51  
52  
53 indispensable. I understood what such a life is like when I went there... It may  
54  
55  
56 be simply that different people have different lifestyles. (Student 6, urban)  
57  
58  
59  
60

1  
2  
3  
4  
5  
6 This empathy created a sense of familiarity and security in the community and reduced  
7  
8  
9 psychological barriers to continuing to belong to the community in the future.  
10  
11

## 12 13 1.2 Grasping the demands of CH

14  
15  
16 Students saw that patients and their families appreciated healthcare professionals and  
17  
18 directly experienced the community residents' expectations of the students. These  
19  
20 experiences satisfied the needs of being evaluated by others, and evoked the willingness  
21  
22 to commit to this demand in their future CH practice.  
23  
24  
25  
26  
27  
28

29 Every individual I saw expressed gratitude to the doctor...It was a good  
30  
31 experience. I'm not sure if this will be my life's work, but I thought it would  
32  
33 be nice to commit to this kind of work for a certain period. (Student 14, urban)  
34  
35  
36

37  
38 The residents were kind. I was impressed when they said to me, 'Please come  
39  
40 back.' This experience made me feel that doctors like us are in demand.  
41  
42  
43

44 (Student 13, rural)  
45  
46  
47  
48

49 Conversely, community residents' excessive expectations for students led to  
50  
51 students' fears that they may not be able to fulfill them. This caused anxiety about future  
52  
53 CH practices.  
54  
55  
56  
57

58 Of course, I would be glad...if I could actually save people's lives in the  
59  
60

1  
2  
3  
4  
5  
6 future. That being said, the pressure is too much, I wouldn't be able to do  
7  
8  
9 everything perfectly. Therefore... I feel it would be challenging. (Student 7,  
10  
11  
12 urban)

### 17 1.3 Understanding the practices of CH

18  
19  
20 Students understood CH practices such as holistic medical care, comprehensive care,  
21  
22  
23 home care, preventive care, and a community-oriented approach, then imagined their  
24  
25  
26 future practice. This experience enabled students to replace uncertainty about their own  
27  
28  
29 future practices with practical knowledge. Furthermore, if students were interested in  
30  
31  
32 these practices, the desire to practice these activities was stimulated.

33  
34  
35  
36 It goes without saying that I want to do this job. These experiences are really  
37  
38  
39 helpful in that I can now imagine how I would be working in the future. They  
40  
41  
42 were very effective opportunities because I could think about what I need to  
43  
44  
45 know. (Student 12, urban)

### 49 1.4 Finding a role model

50  
51  
52 If the students' role models' practices were deemed achievable for students in the future,  
53  
54  
55 their desire to emulate the role model was stimulated. This experience contributed to the  
56  
57  
58 formation of future self-images engaging in CH.  
59  
60

1  
2  
3  
4  
5  
6 The doctor was really...the best... He can be an ideal role model. I'm grateful

7  
8  
9 I had many opportunities to see the doctor thereafter. I listened to many of his  
10  
11  
12 stories. (Student 5, rural)

13  
14  
15  
16  
17 However, this was obstructed if the students thought the role models' abilities  
18  
19 were beyond their own capacities. Their anxiety about carrying out unfeasible practices  
20  
21  
22 in the future was stimulated.

23  
24  
25  
26  
27 I really admire them. I think they're great. On the other hand, I'm not  
28  
29 confident I can be like them... There are a lot of genuinely smart doctors and  
30  
31  
32 those who are passionate about CH. If I was asked if I have such a strong  
33  
34  
35 passion, I don't have that much passion, so I'm worried if I can actually  
36  
37  
38 become a doctor like them. (Student 7, urban)

### 39 40 41 42 43 1.5 Diminishing the conflicts between personal life and career

44  
45  
46 Students felt a potential conflict between their imagined future private lives, including  
47  
48  
49 marriage and childcare, and their career ideals (e.g., attaining specialist certifications).

50  
51  
52 Diminishing this conflict secured the autonomy of their future daily lives and career  
53  
54  
55 choices.

1  
2  
3  
4  
5  
6 I felt that life events like marriage and having a child will inevitably weaken  
7  
8  
9 motivation. That's why, having listened to Dr. A., I'm glad her talk helped  
10  
11  
12 me figure out how I can overcome such challenges. (Student 4, urban)

13  
14  
15 Specialist physician...I have been worried constantly because I don't know  
16  
17  
18 what to do if I became interested in obtaining certification. I mean, I thought  
19  
20  
21 I would be far behind if I continued as a *chiikiwaku* physician. However, I've  
22  
23  
24 heard *chiikiwaku* physicians have been able to obtain specialist  
25  
26  
27 certification.... I appreciate this because I no longer have to be worried.

28  
29  
30 (Student 4, urban)

## 31 32 33 34 **2. Belonging to a supportive community**

35  
36  
37 Robust construction of students' CH community and harmonization with community  
38  
39  
40 residents brought about a sense of belonging to a supportive community for *chiikiwaku*  
41  
42  
43 students.

### 44 45 46 47 48 **2.1 Robust construction of students' CH community**

49  
50  
51 The sense of belonging to the medical student community interested in CH was increased  
52  
53  
54 by constructing a robust community relationship.

55  
56  
57  
58 Listening to different views and expectations of CH helps increase motivation.



1  
2  
3  
4  
5  
6 This is because through such experiences, I can feel first-hand that I am part  
7  
8  
9 of a group of people who take CH seriously. (Student 12, urban)  
10  
11  
12

13  
14 On the other hand, critics of CH can decrease students' motivation. However, if  
15  
16 the students' CH community functioned in a robust manner and students recognized their  
17  
18 own sense of community belonging, then these conflicts might conversely strengthen  
19  
20 their sense of belonging.  
21  
22  
23

24  
25  
26 From time to time, I came across a doctor who unshakably believes in  
27  
28 specialists. I didn't enjoy listening to such a doctor ... I would have a myopic  
29  
30 view if I constantly listened to people who keep on saying that community  
31  
32 physicians are better. I would rather like to say I have seen that side and I dare  
33  
34 to have chosen this side. At that time, I felt uncomfortable. Though, in  
35  
36 hindsight, that experience helped me choose the right path. (Student 1, urban)  
37  
38  
39  
40  
41  
42  
43  
44  
45

46 Furthermore, the community support system made students feel secure. In this  
47  
48 regard, students' affinity with the community of medical doctors had an interesting role.  
49  
50 For some *chiikiwaku* students, their relationships with the local government's  
51  
52 administrative department that has the authority to decide their future working location  
53  
54 was perceived as an employee–employer relationship. However, when students realized  
55  
56  
57  
58  
59  
60

1  
2  
3  
4  
5  
6 there were doctors in the administrative department and that these doctors were involved  
7  
8  
9 in supporting their careers, the feeling of an employee–employer relationship was eased,  
10  
11  
12 and their feeling of autonomy regarding career choice was secured.  
13  
14  
15

16 As the government always tells us where to go, I've been feeling that I'm  
17  
18 made to work for them. As I didn't know that certain doctors are working as  
19  
20 government officers, I was thinking that those who don't know much about  
21  
22 what doctors do are unilaterally deciding what we should do. It was valuable  
23  
24 to learn that the government includes those who understand doctors' work  
25  
26 and that such people care about our careers and are trying to develop a system  
27  
28  
29  
30  
31  
32  
33  
34 in which we can have equal opportunities. (Student 1, urban)  
35  
36  
37  
38

## 39 2.2 Harmonization with community residents 40

41  
42 As newcomers, students felt anxious about creating relationships with the community  
43  
44 residents. However, as students recognized that they were accepted into the community,  
45  
46 the sense of belonging to the community of residents was engendered. Furthermore,  
47  
48 community residents' dedication to CH and medical education evoked students' desires  
49  
50  
51  
52 to contribute to the community.  
53  
54  
55  
56  
57

58 As I was very welcomed there, I would like to give back to them by working  
59  
60

1  
2  
3  
4  
5  
6 hard. ...When they said, 'Is there anything to learn from us?' and 'I would be  
7  
8  
9 more than happy to help you if it would be beneficial,' I felt that I was given  
10  
11  
12 such valuable opportunities to learn. (Student 10, urban)  
13  
14  
15  
16

### 17 **3. Psychological effects**

18  
19  
20 Psychological effects, namely the affect heuristic and framing effect, stimulated students'  
21  
22  
23 motivation to contribute to CH, by improving their conceptual image of CH.  
24  
25  
26

#### 27 **3.1 Affect heuristic**

28  
29  
30 This is a psychological effect in which emotions affect the judgment of things quickly  
31  
32  
33 and automatically.<sup>40</sup> CBME elements such as unique experiences in the community,  
34  
35  
36 interaction with others, enjoyable and relaxed practice environments, acquisition of fresh  
37  
38  
39 knowledge and skills, and finding a role model induced enjoyable, happy, and positive  
40  
41  
42 feelings in students. These positive feelings impacted their conceptual image of CH.  
43  
44  
45

46  
47 For clinical clerkship in university, for example, I have to take training  
48  
49  
50 seriously, but the summer program was rather fun, a more harmonious  
51  
52  
53 training and hence was quite interesting. (Student 5, rural)  
54  
55  
56  
57  
58  
59  
60

### 3.2 Framing effect

This is a cognitive bias in which a presentation of something creates a decision-making bias.<sup>41</sup> Showing that CH professionals had an enjoyable work life and lifestyle, and describing how rewarding CH can be to students created a framing effect that CH was worthwhile. This affected students' conceptual image of CH.

All doctors look happy there. Every time I go there, I'm reminded they all enjoy working there. Every doctor is thriving there. (Student 4, urban)

## DISCUSSION

We explored what kind of experiences influence *chiikiwaku* students' motivation for practicing CH and the mechanism of this influence. Three mechanisms (main themes) and corresponding experiences (sub-themes) emerged. The first theme was envisioning and preparing for practicing CH. Its sub-themes were empathy for the community, grasping the demands for CH, understanding the practices of CH, finding a role model, and diminishing the conflicts between personal life and career. The second theme was belonging to a supportive community. Its sub-themes included robust construction of students' CH community and harmonization with community residents. The third theme included psychological effects. Its sub-themes were the affect heuristic and framing effect.

1  
2  
3  
4  
5  
6 The corresponding experiences brought about the changes and influences on the students  
7  
8  
9 described in the presented mechanisms, and motivated them to practice CH.  
10

11  
12 We used theoretical frameworks<sup>27-30</sup> to interpret the process of how these  
13  
14 experiences motivated students. The first mechanism, envisioning and preparing for  
15  
16 practicing CH, strengthens the expectation of success and subjective task value<sup>29</sup> through  
17  
18 self-images of future CH practice. In addition, each experience that led to envisioning and  
19  
20 preparing for practicing CH also included other motivating factors for students. Empathy  
21  
22 for the community brings positive emotions such as optimism, calmness, and relaxation  
23  
24 from familiarity and security, which influence intrinsic motivation.<sup>30</sup> Furthermore, deeper  
25  
26 knowledge of the region can building a self-image of living in the region through reducing  
27  
28 psychological barriers, and increase expectation of success<sup>29</sup> in living and practicing CH  
29  
30 in the region. With regard to grasping the demands for CH, students can recognize the  
31  
32 importance of CH from the gratitude shown to healthcare professionals and the  
33  
34 expectations of the students expressed by community residents and patients. This  
35  
36 experience makes students recognize the task value<sup>29</sup> of CH. Furthermore, the regulation  
37  
38 types proposed by SDT<sup>28</sup> can also be used to interpret these experiences. This is an  
39  
40 example of introjected regulation if their practice of CH is praised by others, and  
41  
42 identified regulation which refers to the recognition that CH is important. Through these  
43  
44  
45  
46  
47  
48  
49  
50  
51  
52  
53  
54  
55  
56  
57  
58  
59  
60

1  
2  
3  
4  
5  
6 regulations, students' need for competence can be stimulated. On the other hand,  
7  
8  
9 excessive expectations cause negative emotions for students (i.e., anxiety), who fear that  
10  
11  
12 they may not have the required abilities or may not meet the expectations of residents and  
13  
14  
15 patients, and reduce their expectation of success.<sup>29</sup> With regard to finding a role model, if  
16  
17  
18 a student's expectation that they can become like their role model increases, their need  
19  
20  
21 for competence is stimulated; by contrast, if the expectation of success decreases, the need  
22  
23  
24 for competence is stifled.<sup>28</sup> Additionally, finding a role model evokes a positive emotion  
25  
26  
27 arising from the desire to be like the role model: enthusiasm. This positive emotion could  
28  
29  
30 bring more internalized regulation,<sup>30</sup> specifically integrated regulation, which integrates  
31  
32  
33 the identification of the value of CH and students' self-beliefs, or intrinsic regulation  
34  
35  
36 related to students' strong interests.<sup>28</sup> With regard to diminishing the conflicts between  
37  
38  
39 personal life and career, knowing how physicians practicing CH deal with these conflicts  
40  
41  
42 and improving students' ability to cope can increase the expectation of success.<sup>29</sup>  
43  
44  
45 Assurance of students' autonomy in career choice secure their need for autonomy.<sup>28</sup>  
46  
47  
48 Moreover, confirmation of autonomy bring about a shift from negative (worry) to positive  
49  
50  
51 emotions (calmness).<sup>30</sup>  
52  
53

54  
55 With reference to the second mechanism, belonging to a supportive community  
56  
57 satisfies students' relatedness needs.<sup>28</sup> In addition, regarding the robust construction of  
58  
59  
60

1  
2  
3  
4  
5  
6 students' CH community, the fact that doctors working in the local government actively  
7  
8  
9 support students and reduce the sense of an employee-employer relationship brings  
10  
11  
12 positive emotions (calmness)<sup>30</sup> for students, and secures their autonomy needs<sup>28</sup> regarding  
13  
14  
15 their career choice. With regard to harmonization with community residents, the active  
16  
17  
18 involvement of residents in student education arouses the students' needs for  
19  
20  
21 competence,<sup>28</sup> stimulating their desire to contribute to the community. This could also  
22  
23  
24 stimulate integrated regulation, which goes beyond simple praise or recognition of  
25  
26  
27 importance.<sup>28</sup>

28  
29  
30 Regarding the third main theme, the affect heuristic and framing effects induce  
31  
32  
33 improvements in the students' image of CH. Positive emotions (enthusiasm, cheerfulness,  
34  
35  
36 optimism, contentedness, calmness, and relaxation) are greatly involved in this.<sup>40 41</sup> These  
37  
38  
39 positive emotions also promote intrinsic regulation, related to students' strong interests.<sup>30</sup>

40  
41  
42 In previous studies, broad practice scope,<sup>42-45</sup> general practice,<sup>46</sup> specialty,<sup>42 44</sup>  
43  
44  
45 clinical skill,<sup>46</sup> role models,<sup>43 44 47 48</sup> work satisfaction,<sup>42 49</sup> lifestyle,<sup>43 44 46 50</sup> exposure to  
46  
47  
48 different places,<sup>49</sup> rural rotation,<sup>49</sup> patient interaction,<sup>46</sup> and social network<sup>47</sup> have been  
49  
50  
51 listed as factors that increase the medical students' primary care and/or rural healthcare  
52  
53  
54 motivations. Our study's findings are consistent with these previous findings. For  
55  
56  
57 example, broad practice scope, general practice, specialty, clinical skill and work  
58  
59  
60

1  
2  
3  
4  
5  
6 satisfaction would be included in understanding the practices of CH. Lifestyle would be  
7  
8  
9 included in diminishing the conflicts between personal life and career. Exposure to  
10  
11  
12 different places, rural rotation, and patient interaction would be included in empathy for  
13  
14  
15 the community, grasping the demands for CH, and harmonization with community  
16  
17  
18 residents. Finally, social network would be included in robust construction of students'  
19  
20  
21 CH community and harmonization with community residents. However, the novel  
22  
23  
24 significance of our study is that it includes detailed descriptions of how these factors  
25  
26  
27 (experiences) affected students' motivation and interprets the results through the lenses  
28  
29  
30 of multi-faceted motivation theories. In addition, importantly, the influence of  
31  
32  
33 psychological effects on students' motivation was suggested.  
34  
35  
36  
37

### 38 **Lessons for CBME programming**

39  
40  
41 How should our results be used when designing and reconstructing CBME programs so  
42  
43  
44 as to effectively foster students' motivation to become involved in CH? We suggest five  
45  
46  
47 possible approaches.  
48  
49

50 First, there should be many opportunities to interact with community residents as  
51  
52  
53 well as patients. By interacting with them, students can learn more about the community  
54  
55  
56 and the region, understand appreciation for and expectations of healthcare professionals  
57  
58  
59  
60



1  
2  
3  
4  
5  
6 and students, construct relationships with the community of residents, and have enjoyable  
7  
8  
9 experiences that they cannot otherwise gain by working in hospitals.  
10

11  
12 Second, patients and community residents should be asked to share their  
13  
14 appreciation for healthcare professionals and health-related concerns with students.  
15  
16 Communicating gratitude and expectations to others is sometimes embarrassing.  
17  
18  
19 However, this is important for helping students easily grasp the demands of CH.  
20  
21  
22

23  
24 Third, healthcare professionals should provide positive messages to students  
25  
26 about why they continue their work, how they feel rewarded, what they enjoy in work  
27  
28 and life, and how to deal with conflicts between their private lives and careers. These  
29  
30 make it easier for students to perceive healthcare professionals as role models, and  
31  
32 facilitate the student's vision of their future CH practice. Furthermore, the framing effect  
33  
34 improves the student's conceptual image of CH.  
35  
36  
37  
38  
39  
40  
41

42  
43 Fourth, there should be time for students to interact with each other and have an  
44  
45 enjoyable leisure time. This would construct robust student relationships and generate  
46  
47 pleasant memories, which would improve the students' conceptual image of CH through  
48  
49 affect heuristics.  
50  
51  
52

53  
54 Fifth, there should be time to become familiar with the community environments  
55  
56 and cultures. If these become enjoyable experiences for students, students would become  
57  
58  
59  
60

1  
2  
3  
4  
5  
6 attached to the community and region, have increased empathy for them, and their  
7  
8  
9 conceptual image of CH would again be improved through affect heuristics.  
10

11  
12 Incorporation of these items into CBME programs may encourage students to  
13  
14  
15 maintain and improve their motivation for practicing CH.  
16  
17

## 18 19 20 **Limitations**

21  
22  
23 There were several limitations to our study.

24  
25  
26 First, this study focused on what kind of experiences influence *chiikiwaku*  
27  
28 students' motivation for practicing CH, and the mechanism of this influence, and was not  
29  
30 intended to provide reasons to motivate other students to participate in the *chiikiwaku*  
31  
32 system or engage in CH. In order to increase the number of physicians engaged in CH, it  
33  
34 is necessary to motivate not only *chiikiwaku* students but all other students as well.  
35  
36  
37  
38  
39  
40  
41 Further research targeting general students who have no CH obligations are needed.  
42  
43

44  
45 Second, study participants were limited to *chiikiwaku* students from a single  
46  
47 university. There are many variations in the *chiikiwaku* system, including selection  
48  
49 methods, scholarship options, and working style after graduation, among others.  
50  
51  
52  
53 *Chiikiwaku* doctors who graduate from Kobe University may work at small medical  
54  
55 institutions in rural areas, but some *chiikiwaku* doctors who attended other universities  
56  
57  
58  
59  
60

1  
2  
3  
4  
5  
6 may work after graduation at tertiary care medical institutions in the prefectures where  
7  
8  
9 their own universities were located. Thus, it is unclear whether all obligated students will  
10  
11  
12 be motivated to participate in CH through similar mechanisms. In this regard, further  
13  
14  
15 research targeting *chiikiwaku* students who belong to other universities is also needed.  
16  
17

18  
19 Third, this study was conducted with students by their teachers. Thus, their  
20  
21 hierarchical relationship could be a problem.<sup>34</sup> To address this problem, we made various  
22  
23 efforts as described in the Methods, however we cannot completely eliminate the social  
24  
25 desirability bias.<sup>35</sup>  
26  
27  
28  
29  
30  
31  
32  
33  
34

## 35 CONCLUSIONS

36  
37  
38 The *chiikiwaku* students developed a motivation to be involved in CH through self-images  
39  
40 of their future CH practice and life (i.e., envisioning and preparing for practicing CH);  
41  
42  
43 constructing a robust student CH community and harmonizing with community residents  
44  
45 (i.e., belonging to a supportive community); and experiences generating positive  
46  
47 emotions that improve their conceptual image of CH (psychological effects). Many of  
48  
49  
50 these mechanisms are generated by positive interaction with community residents,  
51  
52  
53 healthcare professionals, and other students, and in exposure to attractive community  
54  
55  
56  
57  
58  
59  
60

1  
2  
3  
4  
5  
6 environments and cultures. Thus, these experiences should be incorporated into CBME  
7  
8  
9 programs to further encourage students' positive attitudes toward CH.  
10

## 11 12 13 14 15 **ACKNOWLEDGEMENTS**

16  
17  
18 The authors wish to thank Editage (www.editage.com) for English language editing.  
19

## 20 21 22 **COMPETING INTERESTS**

23  
24 The authors report no conflicts of interest. The authors alone are responsible for the  
25  
26  
27 content and writing of the article.  
28

## 29 30 31 **FUNDING**

32  
33  
34 This study was supported by Grants-in-Aid for Scientific Research from the Japan Society  
35  
36  
37 for the Promotion of Science (JSPS KAKENHI Grant Number JP16K08870).  
38

## 39 40 41 **ETHICAL APPROVAL**

42  
43 The Institutional Review Board of Kobe University Graduate School of Medicine  
44  
45  
46 approved this study on July 17, 2018 (number 180087).  
47

## 48 49 50 **CONTRIBUTORS**

51  
52  
53 YS was chiefly responsible for the study design, acquisition, analysis, and interpretation  
54  
55  
56 of the data and drafting of the manuscript. OM contributed to the study design, analysis,  
57  
58  
59  
60

1  
2  
3  
4  
5  
6 and interpretation of the data, and a critical revision of the manuscript. TT and KT  
7  
8  
9 contributed to the study design and the critical revision of the manuscript. All of the  
10  
11  
12 authors approved the final version of the manuscript.  
13  
14

## 15 16 **DATA AVAILABILITY STATEMENT**

17  
18  
19 The data used and/or analyzed during the current study are available from the  
20  
21  
22 corresponding author on reasonable request.  
23  
24  
25  
26  
27

## 28 **REFERENCES**

- 29  
30  
31 1. Marengoni A, Angleman S, Melis R, et al. Aging with multimorbidity: a systematic  
32  
33  
34 review of the literature. *Ageing Res Rev* 2011;10(4):430-9. doi:  
35  
36  
37 10.1016/j.arr.2011.03.003 [published Online First: 16 March 2011]  
38  
39  
40 2. Tsutsui T. Implementation process and challenges for the community-based integrated  
41  
42  
43 care system in Japan. *Int J Integr Care* 2014;14:e002. doi: 10.5334/ijic.988  
44  
45  
46 [published Online First: 31 January 2014]  
47  
48  
49 3. World Health Organization Centre for Health Development (Kobe, Japan). *A glossary*  
50  
51  
52 *of terms for community health care and services for older persons. Kobe, Japan:*  
53  
54  
55 *World Health Organization Centre for Health Development. 2004.*  
56  
57  
58 <https://apps.who.int/iris/handle/10665/68896> (accessed 3 April 2020).  
59  
60

- 1  
2  
3  
4  
5  
6  
7 4. Kainuma M, Kikukawa M, Nagata M, et al. Competencies necessary for becoming a  
8  
9 leader in the field of community medicine: a Japanese qualitative interview study.  
10  
11  
12 *BMJ Open* 2018;8(4):e020082. doi: 10.1136/bmjopen-2017-020082 [published  
13  
14  
15 Online First: 19 April 2018]  
16  
17  
18 5. World Health Organization. (ed.) *Increasing Access to Health Workers in Remote and*  
19  
20  
21 *Rural Areas Through Improved Retention: Global Policy Recommendations.*  
22  
23  
24 Geneva, Switzerland: WHO Press, 2010.  
25  
26  
27 6. Matsumoto M, Inoue K, Takeuchi K. Quality of care in Japan: an additional strategy.  
28  
29  
30 *Lancet* 2011;378(9807):e17. doi: 10.1016/S0140-6736(11)61841-2 [published  
31  
32  
33 Online First: 6 December 2011]  
34  
35  
36 7. Kataoka Y, Takayashiki A, Sato M, et al. Japanese regional-quota medical students in  
37  
38  
39 their final year are less motivated to work in medically underserved areas than  
40  
41  
42 they were in their first year: a prospective observational study. *Rural Remote*  
43  
44  
45 *Health* 2018;18(4):4840. doi: 10.22605/RRH4840 [published Online First: 27  
46  
47  
48 October 2018]  
49  
50  
51 8. Matsumoto M, Takeuchi K, Owaki T, et al. Results of physician licence examination  
52  
53  
54 and scholarship contract compliance by the graduates of regional quotas in  
55  
56  
57 Japanese medical schools: a nationwide cross-sectional survey. *BMJ Open*  
58  
59  
60

- 1  
2  
3  
4  
5  
6  
7  
8  
9  
10  
11  
12  
13  
14  
15  
16  
17  
18  
19  
20  
21  
22  
23  
24  
25  
26  
27  
28  
29  
30  
31  
32  
33  
34  
35  
36  
37  
38  
39  
40  
41  
42  
43  
44  
45  
46  
47  
48  
49  
50  
51  
52  
53  
54  
55  
56  
57  
58  
59  
60
- 2017;7(12):e019418. doi: 10.1136/bmjopen-2017-019418 [published Online First: 25 December 2017]
9. Hearst N, Shore WB, Hudes ES, et al. Family practice bashing as perceived by students at a university medical center. *Fam Med* 1995;27(6):366-70. [published Online First: 1 June 1995]
10. Bowman MA, Haynes RA, Rivo ML, et al. Characteristics of medical students by level of interest in family practice. *Fam Med* 1996;28(10):713-9. [published Online First: 1 November 1996]
11. Barrett FA, Lipsky MS, Lutfiyya MN. The impact of rural training experiences on medical students: a critical review. *Acad Med* 2011;86(2):259-63. doi: 10.1097/ACM.0b013e3182046387 [published Online First: 21 December 2010]
12. Kelly L. (ed.) *Community-based medical education: a teacher's handbook*. Radcliffe Publishing: London, England, 2012.
13. Crampton PES, McLachlan JC, Illing JC. A systematic literature review of undergraduate clinical placements in underserved areas. *Med Educ* 2013;47(10):969-78. doi: 10.1111/medu.12215 [published Online First: 11 September 2013]
14. Lee SW, Clement N, Tang N, et al. The current provision of community-based

- 1  
2  
3  
4  
5  
6 teaching in UK medical schools: an online survey and systematic review. *BMJ*  
7  
8  
9 *Open* 2014;4(12):e005696. doi: 10.1136/bmjopen-2014-005696 [published  
10  
11  
12 Online First: 3 December 2014]
- 13  
14  
15 15. Laven G, Wilkinson D. Rural doctors and rural backgrounds: how strong is the  
16  
17  
18 evidence? A systematic review. *Aust J Rural Health* 2003;11(6):277-84. doi:  
19  
20  
21 10.1111/j.1440-1584.2003.00534.x [published Online First: 18 December 2003]  
22  
23
- 24 16. Okayama M, Kajii E. Does community-based education increase students' motivation  
25  
26  
27 to practice community health care?--a cross sectional study. *BMC Med Educ*  
28  
29  
30 2011;11:19. doi: 10.1186/1472-6920-11-19  
31  
32
- 33 17. Viscomi M, Larkins S, Gupta TS. Recruitment and retention of general practitioners  
34  
35  
36 in rural Canada and Australia: a review of the literature. *Can J Rural Med*  
37  
38  
39 2013;18(1):13-23. [published Online First: 25 December 2012]  
40  
41
- 42 18. Pfarrwaller E, Sommer J, Chung C, et al. Impact of Interventions to Increase the  
43  
44  
45 Proportion of Medical Students Choosing a Primary Care Career: A Systematic  
46  
47  
48 Review. *J Gen Intern Med* 2015;30(9):1349-58. doi: 10.1007/s11606-015-3372-  
49  
50  
51 9 [published Online First: 16 July 2015]  
52  
53
- 54 19. Strasser R, Worley P, Cristobal F, et al. Putting communities in the driver's seat: the  
55  
56  
57 realities of community-engaged medical education. *Acad Med* 2015;90(11):1466-  
58  
59  
60



- 1  
2  
3  
4  
5  
6  
7 70. doi: 10.1097/acm.0000000000000765 [published Online First: 29 May 2015]  
8  
9  
10 20. Budhathoki SS, Zwanikken PA, Pokharel PK, et al. Factors influencing medical  
11  
12 students' motivation to practise in rural areas in low-income and middle-income  
13  
14 countries: a systematic review. *BMJ Open* 2017;7(2):e013501. doi:  
15  
16 10.1136/bmjopen-2016-013501 [published Online First: 25 February 2017]  
17  
18  
19  
20  
21 21. Johnson GE, Wright FC, Foster K. The impact of rural outreach programs on medical  
22  
23 students' future rural intentions and working locations: a systematic review. *BMC*  
24  
25 *Med Educ* 2018;18(1):196. doi: 10.1186/s12909-018-1287-y [published Online  
26  
27 First: 16 August 2018]  
28  
29  
30  
31  
32  
33 22. Crampton PES. *Medical student learning during longitudinal clinical placements in*  
34  
35 *under-served, deprived, community areas: A qualitative study*. Doctoral theses.  
36  
37 Durham University; 2015.  
38  
39  
40  
41  
42 23. Dube TV, Schinke RJ, Strasser R, et al. Transition processes through a longitudinal  
43  
44 integrated clerkship: a qualitative study of medical students' experiences. *Med*  
45  
46 *Educ* 2015;49(10):1028-37. doi: 10.1111/medu.12797 [published Online First: 19  
47  
48 September 2015]  
49  
50  
51  
52  
53  
54 24. O'Brien BC, Harris IB, Beckman TJ, et al. Standards for reporting qualitative  
55  
56 research: a synthesis of recommendations. *Acad Med* 2014;89(9):1245-51. doi:  
57  
58  
59  
60

- 1  
2  
3  
4  
5  
6  
7 10.1097/acm.0000000000000388 [published Online First: 1 July 2014]  
8  
9  
10 25. Denzin NK, Lincoln YS. *The SAGE Handbook of Qualitative Research*. 5th ed.  
11  
12 Thousand Oaks, CA: SAGE Publications; 2017.  
13  
14  
15 26. Cook DA, Artino AR, Jr. Motivation to learn: an overview of contemporary theories.  
16  
17  
18 *Med Educ* 2016;50(10):997-1014. doi: 10.1111/medu.13074  
19  
20  
21 27. Reeve J. *Understanding Motivation and Emotion*. 7th ed. Hoboken, NJ: John Wiley  
22  
23 & Sons; 2018.  
24  
25  
26  
27 28. Deci EL, Ryan RM. The "What" and "Why" of Goal Pursuits: Human Needs and the  
28  
29 Self-Determination of Behavior. *Psychol Inq* 2000;11(4):227-68. doi:  
30  
31 10.1207/S15327965PLI1104\_01  
32  
33  
34  
35  
36 29. Wigfield A, Eccles JS. Expectancy-Value Theory of Achievement Motivation.  
37  
38  
39 *Contemp Educ Psychol* 2000;25(1):68-81. doi: 10.1006/ceps.1999.1015  
40  
41 [published Online First: 6 January 2000]  
42  
43  
44  
45 30. Vandercammen L, Hofmans J, Theuns P. Relating specific emotions to intrinsic  
46  
47 motivation: on the moderating role of positive and negative emotion  
48  
49 differentiation. *PloS One* 2014;9(12):e115396-e96. doi:  
50  
51 10.1371/journal.pone.0115396  
52  
53  
54  
55  
56  
57 31. Ten Cate TJ, Kusurkar RA, Williams GC. How self-determination theory can assist  
58  
59  
60

- our understanding of the teaching and learning processes in medical education.
- AMEE guide No. 59. *Med Teach* 2011;33(12):961-73. doi: 10.3109/0142159x.2011.595435 [published Online First: 10 January 2012]
32. Kusurkar RA, Croiset G, Mann KV, et al. Have motivation theories guided the development and reform of medical education curricula? A review of the literature. *Acad Med* 2012;87(6):735-43. doi: 10.1097/ACM.0b013e318253cc0e [published Online First: 27 April 2012]
33. Orsini C, Binnie VI, Wilson SL. Determinants and outcomes of motivation in health professions education: a systematic review based on self-determination theory. *J Educ Eval Health Prof* 2016;13:19-19. doi: 10.3352/jeehp.2016.13.19
34. Boet S, Sharma S, Goldman J, et al. Review article: medical education research: an overview of methods. *Can J Anaesth* 2012;59(2):159-70. doi: 10.1007/s12630-011-9635-y [published Online First: 5 January 2012]
35. Nederhof AJ. Methods of coping with social desirability bias: A review. *Eur J Soc Psychol* 1985;15(3):263-80. doi: 10.1002/ejsp.2420150303
36. Polit DF, Beck CT. *Nursing Research: Principles and Methods*. 7th ed. Philadelphia, PA: Lippincott Williams & Wilkins; 2004.
37. Saunders B, Sim J, Kingstone T, et al. Saturation in qualitative research: exploring its

- 1  
2  
3  
4  
5  
6 conceptualization and operationalization. *Qual Quant* 2018;52(4):1893-907. doi:  
7  
8  
9 10.1007/s11135-017-0574-8 [published Online First: 14 September 2017]  
10  
11  
12 38. Otani T. "SCAT" A qualitative data analysis method by four-step coding: Easy  
13  
14 startable and small scale data-applicable process of theorization. *Bulletin of the*  
15  
16 *Graduate School of Education and Human Development (Educational Sciences),*  
17  
18 *Nagoya University* 2007;54:27-44 (in Japanese with English abstract).  
19  
20  
21  
22  
23  
24 39. Otani T. Qualitative research series SCAT: Steps for Coding and Theorization--A  
25  
26 qualitative data analysis methodology with explicit procedures that is easy to start  
27  
28 and applicable to smaller data. *Kansei Kougaku* 2011;10(3):155-60 (in Japanese).  
29  
30  
31  
32  
33 40. Finucane ML, Alhakami A, Slovic P, et al. The affect heuristic in judgments of risks  
34  
35 and benefits. *J Behav Decis Mak* 2000;13(1):1-17. doi: 10.1002/(sici)1099-  
36  
37 0771(200001/03)13:1<1::Aid-bdm333>3.0.Co;2-s  
38  
39  
40  
41  
42 41. Tversky A, Kahneman D. The framing of decisions and the psychology of choice.  
43  
44 *Science* 1981;211(4481):453-58. doi: 10.1126/science.7455683  
45  
46  
47  
48 42. Dixon AS, Lam CL, Lam TP. Does a brief clerkship change Hong Kong medical  
49  
50 students' ideas about general practice? *Med Educ* 2000;34(5):339-47. [published  
51  
52 Online First: 12 April 2000]  
53  
54  
55  
56  
57 43. Jordan J, Brown JB, Russell G. Choosing family medicine. What influences medical  
58  
59  
60

- 1  
2  
3  
4  
5  
6 students? *Can Fam Physician* 2003;49:1131-7. [published Online First: 7 October  
7  
8  
9 2003]
- 10  
11  
12 44. Scott I, Wright B, Brenneis F, et al. Why would I choose a career in family medicine?:  
13  
14  
15 Reflections of medical students at 3 universities. *Can Fam Physician*  
16  
17  
18 2007;53(11):1956-7. [published Online First: 15 November 2007]  
19
- 20  
21 45. Ohta R, Ryu Y, Katsube T, et al. Students' perceptions of general medicine following  
22  
23  
24 community-based medical education in rural Japan. *J Gen Fam Med*  
25  
26  
27 2019;20(6):236-43. doi: 10.1002/jgf2.274  
28
- 29  
30 46. Stagg P, Greenhill J, Worley PS. A new model to understand the career choice and  
31  
32  
33 practice location decisions of medical graduates. *Rural Remote Health*  
34  
35  
36 2009;9(4):1245. [published Online First: 1 December 2009]  
37
- 38  
39 47. Roberts C, Daly M, Kumar K, et al. A longitudinal integrated placement and medical  
40  
41  
42 students' intentions to practise rurally. *Med Educ* 2012;46(2):179-91. doi:  
43  
44  
45 10.1111/j.1365-2923.2011.04102.x [published Online First: 14 January 2012]  
46  
47
- 48 48. Kawamoto R, Uemoto A, Ninomiya D, et al. Characteristics of Japanese medical  
49  
50  
51 students associated with their intention for rural practice. *Rural Remote Health*  
52  
53  
54 2015;15(2):3112. [published Online First: 13 June 2015]  
55
- 56  
57 49. Codsí MP, Rodrigue R, Authier M, et al. Family medicine rotations and medical  
58  
59  
60

1  
2  
3  
4  
5  
6 students' intention to pursue family medicine: Descriptive study. *Can Fam*  
7  
8  
9 *Physician* 2019;65(7):e316-e20. [published Online First: 14 July 2019]51. Birden  
10  
11  
12 HH, Wilson I. Rural placements are effective for teaching medicine in Australia:  
13  
14  
15 evaluation of a cohort of students studying in rural placements. *Rural Remote*  
16  
17  
18 *Health* 2012;12:2167. [published Online First: 2012/11/20]  
19

- 20  
21  
22 50. Birden HH, Wilson I. Rural placements are effective for teaching medicine in  
23  
24  
25 Australia: evaluation of a cohort of students studying in rural placements. *Rural*  
26  
27  
28 *Remote Health* 2012;12:2167. [published Online First: 20 November 2012]  
29  
30  
31  
32  
33  
34  
35  
36  
37  
38  
39  
40  
41  
42  
43  
44  
45  
46  
47  
48  
49  
50  
51  
52  
53  
54  
55  
56  
57  
58  
59  
60

1  
2 **Supplemental appendix. Interview guide used in the study.**

---

- 3 1. What do you think about community healthcare (CH)?  
4 2. Why do you think so?  
5 3. What were the events that affected your perception about CH?  
6 4. How did the events affect your perception about CH?  
7 5. How does the experience of home care affect your perception about CH?  
8 6. How does the experience of day care/service affect your perception about CH?  
9 7. How does the experience of health education for local residents affect your perception about CH?  
10 8. How does the experience in the rural area affect your perception about CH?  
11  
12
- 

13  
14  
15  
16  
17  
18  
19  
20  
21  
22  
23  
24  
25  
26  
27  
28  
29  
30  
31  
32  
33  
34  
35  
36  
37  
38  
39  
40  
41  
42  
43  
44  
45  
46  
47  
48  
49  
50  
51  
52  
53  
54  
55  
56  
57  
58  
59  
60

For peer review only

# Reporting checklist for qualitative study.

Based on the SRQR guidelines.

## Instructions to authors

Complete this checklist by entering the page numbers from your manuscript where readers will find each of the items listed below.

Your article may not currently address all the items on the checklist. Please modify your text to include the missing information. If you are certain that an item does not apply, please write "n/a" and provide a short explanation.

Upload your completed checklist as an extra file when you submit to a journal.

In your methods section, say that you used the SRQR reporting guidelines, and cite them as:

O'Brien BC, Harris IB, Beckman TJ, Reed DA, Cook DA. Standards for reporting qualitative research: a synthesis of recommendations. Acad Med. 2014;89(9):1245-1251.

|              |                                                                                                                                                                                                                                                                | Page   |
|--------------|----------------------------------------------------------------------------------------------------------------------------------------------------------------------------------------------------------------------------------------------------------------|--------|
|              | Reporting Item                                                                                                                                                                                                                                                 | Number |
| <b>Title</b> | <p><a href="#">#1</a> Concise description of the nature and topic of the study identifying the study as qualitative or indicating the approach (e.g. ethnography, grounded theory) or data collection methods (e.g. interview, focus group) is recommended</p> | 1      |



## Abstract

[#2](#) Summary of the key elements of the study using the abstract format of the intended publication; typically includes background, purpose, methods, results and conclusions

## Introduction

[#3](#) Description and significance of the problem / phenomenon studied: review of relevant theory and empirical work; problem statement

[#4](#) Purpose of the study and specific objectives or question

## Methods

[#5](#) Qualitative approach and research paradigm

Qualitative approach (e.g. ethnography, grounded theory, case study, phenomenology, narrative research) and guiding theory if appropriate; identifying the research paradigm (e.g. postpositivist, constructivist / interpretivist) is also recommended; rationale. The rationale should briefly discuss the justification for choosing that theory, approach, method or technique rather than other options available; the assumptions and limitations implicit in those choices and how those choices influence study conclusions and transferability.

As appropriate the rationale for several items might be discussed together.

|    |                           |                     |        |
|----|---------------------------|---------------------|--------|
| 1  |                           |                     |        |
| 2  |                           |                     |        |
| 3  |                           |                     |        |
| 4  |                           |                     |        |
| 5  |                           |                     |        |
| 6  | Researcher                | <a href="#">#6</a>  | 9-10   |
| 7  |                           |                     |        |
| 8  | characteristics and       |                     |        |
| 9  |                           |                     |        |
| 10 | reflexivity               |                     |        |
| 11 |                           |                     |        |
| 12 |                           |                     |        |
| 13 |                           |                     |        |
| 14 |                           |                     |        |
| 15 |                           |                     |        |
| 16 |                           |                     |        |
| 17 |                           |                     |        |
| 18 |                           |                     |        |
| 19 |                           |                     |        |
| 20 |                           |                     |        |
| 21 |                           |                     |        |
| 22 | Context                   | <a href="#">#7</a>  | 10-11  |
| 23 |                           |                     |        |
| 24 |                           |                     |        |
| 25 | Sampling strategy         | <a href="#">#8</a>  | 11     |
| 26 |                           |                     |        |
| 27 |                           |                     |        |
| 28 |                           |                     |        |
| 29 |                           |                     |        |
| 30 |                           |                     |        |
| 31 |                           |                     |        |
| 32 |                           |                     |        |
| 33 |                           |                     |        |
| 34 |                           |                     |        |
| 35 | Ethical issues pertaining | <a href="#">#9</a>  | 11, 32 |
| 36 |                           |                     |        |
| 37 | to human subjects         |                     |        |
| 38 |                           |                     |        |
| 39 |                           |                     |        |
| 40 |                           |                     |        |
| 41 |                           |                     |        |
| 42 |                           |                     |        |
| 43 |                           |                     |        |
| 44 |                           |                     |        |
| 45 | Data collection methods   | <a href="#">#10</a> | 12     |
| 46 |                           |                     |        |
| 47 |                           |                     |        |
| 48 |                           |                     |        |
| 49 |                           |                     |        |
| 50 |                           |                     |        |
| 51 |                           |                     |        |
| 52 |                           |                     |        |
| 53 |                           |                     |        |
| 54 |                           |                     |        |
| 55 |                           |                     |        |
| 56 |                           |                     |        |
| 57 |                           |                     |        |
| 58 |                           |                     |        |
| 59 |                           |                     |        |
| 60 |                           |                     |        |

|    |                         |                     |                                                          |       |
|----|-------------------------|---------------------|----------------------------------------------------------|-------|
| 1  | Data collection         | <a href="#">#11</a> | Description of instruments (e.g. interview guides,       | 12    |
| 2  |                         |                     | questionnaires) and devices (e.g. audio recorders)       |       |
| 3  | instruments and         |                     | used for data collection; if / how the instruments(s)    |       |
| 4  |                         |                     | changed over the course of the study                     |       |
| 5  | technologies            |                     |                                                          |       |
| 6  |                         |                     |                                                          |       |
| 7  |                         |                     |                                                          |       |
| 8  |                         |                     |                                                          |       |
| 9  |                         |                     |                                                          |       |
| 10 |                         |                     |                                                          |       |
| 11 | Units of study          | <a href="#">#12</a> | Number and relevant characteristics of participants,     | 12    |
| 12 |                         |                     | documents, or events included in the study; level of     |       |
| 13 |                         |                     | participation (could be reported in results)             |       |
| 14 |                         |                     |                                                          |       |
| 15 |                         |                     |                                                          |       |
| 16 |                         |                     |                                                          |       |
| 17 |                         |                     |                                                          |       |
| 18 |                         |                     |                                                          |       |
| 19 | Data processing         | <a href="#">#13</a> | Methods for processing data prior to and during          | 12    |
| 20 |                         |                     | analysis, including transcription, data entry, data      |       |
| 21 |                         |                     | management and security, verification of data integrity, |       |
| 22 |                         |                     | data coding, and anonymisation / deidentification of     |       |
| 23 |                         |                     | excerpts                                                 |       |
| 24 |                         |                     |                                                          |       |
| 25 |                         |                     |                                                          |       |
| 26 |                         |                     |                                                          |       |
| 27 |                         |                     |                                                          |       |
| 28 |                         |                     |                                                          |       |
| 29 |                         |                     |                                                          |       |
| 30 |                         |                     |                                                          |       |
| 31 | Data analysis           | <a href="#">#14</a> | Process by which inferences, themes, etc. were           | 13-14 |
| 32 |                         |                     | identified and developed, including the researchers      |       |
| 33 |                         |                     | involved in data analysis; usually references a specific |       |
| 34 |                         |                     | paradigm or approach; rationale                          |       |
| 35 |                         |                     |                                                          |       |
| 36 |                         |                     |                                                          |       |
| 37 |                         |                     |                                                          |       |
| 38 |                         |                     |                                                          |       |
| 39 |                         |                     |                                                          |       |
| 40 |                         |                     |                                                          |       |
| 41 | Techniques to enhance   | <a href="#">#15</a> | Techniques to enhance trustworthiness and credibility    | 14-15 |
| 42 | trustworthiness         |                     | of data analysis (e.g. member checking, audit trail,     |       |
| 43 |                         |                     | triangulation); rationale                                |       |
| 44 |                         |                     |                                                          |       |
| 45 |                         |                     |                                                          |       |
| 46 |                         |                     |                                                          |       |
| 47 |                         |                     |                                                          |       |
| 48 | <b>Results/findings</b> |                     |                                                          |       |
| 49 |                         |                     |                                                          |       |
| 50 |                         |                     |                                                          |       |
| 51 | Syntheses and           | <a href="#">#16</a> | Main findings (e.g. interpretations, inferences, and     | 15    |
| 52 | interpretation          |                     | themes); might include development of a theory or        |       |
| 53 |                         |                     | model, or integration with prior research or theory      |       |
| 54 |                         |                     |                                                          |       |
| 55 |                         |                     |                                                          |       |
| 56 |                         |                     |                                                          |       |
| 57 |                         |                     |                                                          |       |
| 58 |                         |                     |                                                          |       |
| 59 |                         |                     |                                                          |       |
| 60 |                         |                     |                                                          |       |

|    |                              |                     |                                                          |       |
|----|------------------------------|---------------------|----------------------------------------------------------|-------|
| 1  | Links to empirical data      | <a href="#">#17</a> | Evidence (e.g. quotes, field notes, text excerpts,       | 15-24 |
| 2  |                              |                     | photographs) to substantiate analytic findings           |       |
| 3  |                              |                     |                                                          |       |
| 4  |                              |                     |                                                          |       |
| 5  |                              |                     |                                                          |       |
| 6  | <b>Discussion</b>            |                     |                                                          |       |
| 7  |                              |                     |                                                          |       |
| 8  |                              |                     |                                                          |       |
| 9  |                              |                     |                                                          |       |
| 10 | Intergration with prior      | <a href="#">#18</a> | Short summary of main findings; explanation of how       | 24-30 |
| 11 | work, implications,          |                     | findings and conclusions connect to, support, elaborate  |       |
| 12 |                              |                     | on, or challenge conclusions of earlier scholarship;     |       |
| 13 | transferability and          |                     | discussion of scope of application / generalizability;   |       |
| 14 |                              |                     | identification of unique contributions(s) to scholarship |       |
| 15 | contribution(s) to the field |                     | in a discipline or field                                 |       |
| 16 |                              |                     |                                                          |       |
| 17 |                              |                     |                                                          |       |
| 18 |                              |                     |                                                          |       |
| 19 |                              |                     |                                                          |       |
| 20 |                              |                     |                                                          |       |
| 21 |                              |                     |                                                          |       |
| 22 |                              |                     |                                                          |       |
| 23 |                              |                     |                                                          |       |
| 24 | Limitations                  | <a href="#">#19</a> | Trustworthiness and limitations of findings              | 30-31 |
| 25 |                              |                     |                                                          |       |
| 26 |                              |                     |                                                          |       |
| 27 | <b>Other</b>                 |                     |                                                          |       |
| 28 |                              |                     |                                                          |       |
| 29 |                              |                     |                                                          |       |
| 30 | Conflicts of interest        | <a href="#">#20</a> | Potential sources of influence of perceived influence on | 32    |
| 31 |                              |                     | study conduct and conclusions; how these were            |       |
| 32 |                              |                     | managed                                                  |       |
| 33 |                              |                     |                                                          |       |
| 34 |                              |                     |                                                          |       |
| 35 |                              |                     |                                                          |       |
| 36 |                              |                     |                                                          |       |
| 37 |                              |                     |                                                          |       |
| 38 | Funding                      | <a href="#">#21</a> | Sources of funding and other support; role of funders in | 32    |
| 39 |                              |                     | data collection, interpretation and reporting            |       |
| 40 |                              |                     |                                                          |       |
| 41 |                              |                     |                                                          |       |
| 42 |                              |                     |                                                          |       |

43 The SRQR checklist is distributed with permission of Wolters Kluwer © 2014 by the Association of  
 44 American Medical Colleges. This checklist was completed on 11. April 2020 using  
 45 <https://www.goodreports.org/>, a tool made by the [EQUATOR Network](#) in collaboration with  
 46 [Penelope.ai](#)
