# Supplementary material for: Fostering student motivation towards community healthcare: a qualitative study
Source: PubMed Central journal article supplement — BMJ Open. 2021 Jan 7;11(1):e039344. doi: 10.1136/bmjopen-2020-039344 (PMC7797248; doi:10.1136/bmjopen-2020-039344), 2021-01-07
Supplement: bmjopen-2020-039344supp001.pdf [file bmjopen-2020-039344supp001.pdf]

**Supplemental appendix.** Interview guide used in the study.

---

1. What do you think about community healthcare (CH)?
  2. Why do you think so?
  3. What were the events that affected your perception about CH?
  4. How did the events affect your perception about CH?
  5. How does the experience of home care affect your perception about CH?
  6. How does the experience of day care/service affect your perception about CH?
  7. How does the experience of health education for local residents affect your perception about CH?
  8. How does the experience in the rural area affect your perception about CH?
-
